# Supplementary material for: Surfing motility is a complex adaptation dependent on the stringent stress response in Pseudomonas aeruginosa LESB58
Source: PLoS Pathog. 2020 Mar 24;16(3):e1008444. doi: 10.1371/journal.ppat.1008444 (PMC7122816; doi:10.1371/journal.ppat.1008444)
Supplement: S1 Data — (CSV) [file ppat.1008444.s014.csv]

gene	baseMean	log2FoldChange	lfcSE	stat	pvalue	padj	ABSLFC	FC	LESB58_name	LESB58_description	PAO1_locus_tag	PAO1_name	PAO1_description
PALES_15621	393.7536818	2.967675054	0.233615264	12.70325837	5.67E-37	4.35E-35	2.967675054	7.822745632	PALES_15621	hypothetical protein	NA	NA	NA
PALES_15631	233.2765367	3.182486558	0.256997352	12.38334375	3.22E-35	1.96E-33	3.182486558	9.078705211	PALES_15631	hypothetical protein	NA	NA	NA
PALES_15531	485.5830184	2.70639534	0.230517067	11.74054216	7.90E-32	3.79E-30	2.70639534	6.526888256	orf6	transposase A	NA	NA	NA
PALES_15641	149.3705914	3.665985148	0.317583288	11.5433818	7.97E-31	3.54E-29	3.665985148	12.69321082	PALES_15641	putative integral membrane protein	NA	NA	NA
PALES_37721.1	58.96951631	-4.397368622	0.420755139	-10.45113468	1.45E-25	4.20E-24	4.397368622	-21.07365458	PALES_37721.1	NA	NA	NA	NA
PALES_15581	420.29157	2.61630527	0.256762011	10.18961202	2.21E-24	5.80E-23	2.61630527	6.131777171	PALES_15581	COG4396: Mu-like prophage host-nuclease inhibitor protein Gam	NA	NA	NA
PALES_15511	288.8021507	2.780862778	0.278213382	9.995431421	1.60E-23	3.83E-22	2.780862778	6.87263232	PALES_15511	hypothetical protein	NA	NA	NA
PALES_15551	243.0959436	2.601248856	0.262618022	9.905066045	3.96E-23	9.13E-22	2.601248856	6.068116802	orf8	hypothetical protein	NA	NA	NA
PALES_47391	93.90210967	5.992772199	0.609826431	9.827012898	8.61E-23	1.94E-21	5.992772199	63.68016635	PALES_47391	hypothetical protein	NA	NA	NA
PALES_15591	133.8670523	2.593320787	0.279624611	9.274293778	1.79E-20	3.25E-19	2.593320787	6.034862024	PALES_15591	hypothetical protein	NA	NA	NA
PALES_15601	244.854677	2.512137347	0.292603879	8.585454699	9.05E-18	1.28E-16	2.512137347	5.704645934	PALES_15601	hypothetical protein	NA	NA	NA
PALES_15501	226.8224684	2.779978055	0.335927996	8.275517626	1.28E-16	1.61E-15	2.779978055	6.868419014	orf2	Ner-like protein	NA	NA	NA
PALES_15561	153.0960151	2.549014183	0.320386678	7.956055474	1.78E-15	2.02E-14	2.549014183	5.852342418	PALES_15561	hypothetical protein	NA	NA	NA
PALES_15541	170.3674405	2.099942835	0.269303768	7.797673414	6.31E-15	6.85E-14	2.099942835	4.286923982	orf7	DNA transposition protein	NA	NA	NA
PALES_13361	42.9441963	3.363898844	0.466364653	7.213022737	5.47E-13	4.83E-12	3.363898844	10.29519209	PALES_13361	protein of unknown function DUF1654	NA	NA	NA
PALES_28721	47.81602087	-7.603992952	1.061371762	-7.16430682	7.82E-13	6.82E-12	7.603992952	-194.5494311	PALES_28721	hypothetical protein	NA	NA	NA
PALES_15691	94.91010147	2.094878322	0.298265339	7.023539274	2.16E-12	1.80E-11	2.094878322	4.27190132	orf23	hypothetical protein	NA	NA	NA
PALES_15661	331.9951051	1.640624728	0.247442232	6.630334337	3.35E-11	2.49E-10	1.640624728	3.118008214	orf21	putative structural protein	NA	NA	NA
PALES_15761	257.6239903	1.891597858	0.289274515	6.539109956	6.19E-11	4.46E-10	1.891597858	3.710459495	orf29b	hypothetical protein	NA	NA	NA
PALES_15521	27.52498739	3.315320827	0.518306446	6.39644915	1.59E-10	1.09E-09	3.315320827	9.954306623	PALES_15521	hypothetical protein	NA	NA	NA
PALES_15731	262.4081854	1.694119734	0.265527831	6.380196481	1.77E-10	1.21E-09	1.694119734	3.235793932	PALES_15731	portal protein	NA	NA	NA
PALES_08631	168.5457605	1.580308655	0.263540863	5.996446392	2.02E-09	1.24E-08	1.580308655	2.990338191	PALES_08631	hypothetical protein	NA	NA	NA
PALES_15651	106.0166384	1.80316914	0.304255438	5.926497651	3.09E-09	1.86E-08	1.80316914	3.489859945	orf20	hypothetical protein	NA	NA	NA
PALES_27351	48.67171949	2.00915587	0.341008575	5.891804546	3.82E-09	2.28E-08	2.00915587	4.025466185	PALES_27351	hypothetical protein	NA	NA	NA
PALES_25791	11.83511527	-7.414304631	1.25967306	-5.885896005	3.96E-09	2.36E-08	7.414304631	-170.5799925	pltR	PltR	NA	NA	NA
PALES_15571	97.13879137	2.067957499	0.351769918	5.878721838	4.13E-09	2.45E-08	2.067957499	4.192926378	PALES_15571	hypothetical protein	NA	NA	NA
PALES_15711	231.9390976	1.643575016	0.290264313	5.662339263	1.49E-08	8.29E-08	1.643575016	3.124391013	PALES_15711	hypothetical protein	NA	NA	NA
PALES_46081	152.1479635	1.556846882	0.276095624	5.638795945	1.71E-08	9.41E-08	1.556846882	2.942101221	PALES_46081	hypothetical protein	NA	NA	NA
PALES_23051	104.561821	1.454687461	0.263496293	5.520713196	3.38E-08	1.78E-07	1.454687461	2.740971755	PALES_23051	hypothetical protein	NA	NA	NA
PALES_25611	9.057791391	-6.998211076	1.281671321	-5.460222882	4.76E-08	2.47E-07	6.998211076	-127.8413799	PALES_25611	hypothetical protein	NA	NA	NA
PALES_15681	391.9469467	1.834445976	0.337935388	5.428392642	5.69E-08	2.91E-07	1.834445976	3.566344266	orf22	hypothetical protein	NA	NA	NA
PALES_15751	48.375459	2.033651176	0.381587062	5.329455264	9.85E-08	4.87E-07	2.033651176	4.094397512	PALES_15751	hypothetical protein	NA	NA	NA
PALES_03891	60.22922187	1.725692127	0.324171339	5.323395136	1.02E-07	5.02E-07	1.725692127	3.307387597	PALES_03891	hypothetical protein	NA	NA	NA
PALES_41291	13.18530781	-6.625285671	1.254646225	-5.280600649	1.29E-07	6.25E-07	6.625285671	-98.72103881	PALES_41291	hypothetical protein	NA	NA	NA
PALES_31521	45.00630402	1.829158884	0.347862077	5.25828771	1.45E-07	7.01E-07	1.829158884	3.553298488	PALES_31521	hypothetical protein	NA	NA	NA
PALES_33861	13.82429638	-5.774705764	1.100425106	-5.247704485	1.54E-07	7.39E-07	5.774705764	-54.74691494	PALES_33861	hypothetical protein	NA	NA	NA
PALES_23731	8.031590683	-6.80695589	1.298509287	-5.242131078	1.59E-07	7.59E-07	6.80695589	-111.9690264	PALES_23731	hypothetical protein	NA	NA	NA
PALES_15951	66.9297125	1.621154716	0.315071189	5.145360078	2.67E-07	1.24E-06	1.621154716	3.07621154	PALES_15951	hypothetical protein	NA	NA	NA
PALES_13371	1782.259369	3.10093569	0.608942862	5.092326199	3.54E-07	1.60E-06	3.10093569	8.579750473	PALES_13371	hypothetical protein	NA	NA	NA
PALES_15721	511.9678395	1.488991779	0.302087101	4.929014753	8.26E-07	3.55E-06	1.488991779	2.806927457	PALES_15721	phage uncharacterized protein	NA	NA	NA
PALES_15741	219.4636632	1.424485408	0.290214024	4.908396183	9.18E-07	3.91E-06	1.424485408	2.684187417	PALES_15741	virion morphogenesis protein	NA	NA	NA
PALES_19041	363.869567	-1.007923116	0.210068118	-4.798077525	1.60E-06	6.64E-06	1.007923116	-2.011013987	PALES_19041	still frameshift 3-PHOSPHOSHIKIMATE 1-CARBOXYVINYLTRANSFERASE prephenate dehydrogenase	NA	NA	NA
PALES_15781	52.3005353	1.524473901	0.325775591	4.679521556	2.88E-06	1.15E-05	1.524473901	2.876817896	PALES_15781	hypothetical protein	NA	NA	NA
PALES_15611	25.47332229	2.39519966	0.51570056	4.644555085	3.41E-06	1.34E-05	2.39519966	5.260499009	PALES_15611	hypothetical protein	NA	NA	NA
PALES_31841	24.86832333	2.082677368	0.44998431	4.6283333	3.69E-06	1.44E-05	2.082677368	4.235925946	PALES_31841	hypothetical protein	NA	NA	NA
PALES_42471	183.3350368	1.496496053	0.324874239	4.606385718	4.10E-06	1.59E-05	1.496496053	2.821565915	PALES_42471	hypothetical protein	NA	NA	NA
PALES_15771	123.3342089	1.703324558	0.374455739	4.548800779	5.40E-06	2.05E-05	1.703324558	3.256505263	PALES_15771	hypothetical protein	NA	NA	NA
PALES_32091	92.4574161	1.229016358	0.280456908	4.382193215	1.17E-05	4.21E-05	1.229016358	2.344071145	PALES_32091	hypothetical protein	NA	NA	NA
PALES_16201	269.3525425	1.021992417	0.239368952	4.269527882	1.96E-05	6.79E-05	1.021992417	2.030721527	PALES_16201	hypothetical protein	NA	NA	NA
PALES_15701	121.2522098	1.294694875	0.305507798	4.237845589	2.26E-05	7.76E-05	1.294694875	2.453251046	PALES_15701	conserved hypothetical DNA-binding protein	NA	NA	NA
PALES_15851	1038.974034	1.014218398	0.242669276	4.179426479	2.92E-05	9.89E-05	1.014218398	2.019808335	PALES_15851	hypothetical protein	NA	NA	NA
PALES_35281	41.04729239	3.93961411	0.956462865	4.118940999	3.81E-05	1.26E-04	3.93961411	15.34412114	PALES_35281	hypothetical protein	NA	NA	NA
PALES_33881	37.40273729	-1.766730108	0.432101869	-4.088688886	4.34E-05	1.42E-04	1.766730108	-3.402818278	PALES_33881	hypothetical protein	NA	NA	NA
PALES_15671	28.11134826	1.862447068	0.457557596	4.070410116	4.69E-05	1.53E-04	1.862447068	3.636239105	orf21a	hypothetical protein	NA	NA	NA
PALES_15861	138.4483703	1.128780403	0.280062319	4.030461538	5.57E-05	1.79E-04	1.128780403	2.18673804	PALES_15861	hypothetical protein	NA	NA	NA
PALES_15491	40.4684896	1.469795883	0.37514447	3.917946286	8.93E-05	2.77E-04	1.469795883	2.769827025	PALES_15491	putative c repressor	NA	NA	NA
PALES_39291	58.15995612	-1.124612507	0.294793013	-3.814922528	1.36E-04	4.06E-04	1.124612507	-2.180429746	PALES_39291	hypothetical protein	NA	NA	NA
PALES_15961	54.50464909	1.186627654	0.316711091	3.746719604	1.79E-04	5.25E-04	1.186627654	2.276200516	PALES_15961	hypothetical protein	NA	NA	NA
PALES_49101	74.18369353	-1.068254658	0.286160816	-3.733057075	1.89E-04	5.52E-04	1.068254658	-2.096895053	pilC	still frameshift type 4 fimbrial biogenesis protein PilC	NA	NA	NA
PALES_13211	297.8421288	1.288635866	0.347040587	3.71321371	2.05E-04	5.92E-04	1.288635866	2.442969524	PALES_13211	phage integrase, putative	NA	NA	NA
PALES_15881	195.269361	0.998424014	0.270312394	3.693593178	2.21E-04	6.35E-04	0.998424014	1.997816413	orf46e	hypothetical protein	NA	NA	NA
PALES_50271	80.43018408	1.031538769	0.281575482	3.663453799	2.49E-04	7.09E-04	1.031538769	2.044203423	PALES_50271	hypothetical protein	NA	NA	NA
PALES_31881	13.01784728	2.113962096	0.58921166	3.587780485	3.34E-04	9.29E-04	2.113962096	4.328784845	PALES_31881	hypothetical protein	NA	NA	NA
PALES_15911	149.2508504	1.06312721	0.306486314	3.468759167	5.23E-04	0.001393631	1.06312721	2.089455757	PALES_15911	hypothetical protein	NA	NA	NA
PALES_23341	32.30968501	1.313372241	0.378795717	3.467230969	5.26E-04	0.001400009	1.313372241	2.485217711	PALES_23341	hypothetical protein	NA	NA	NA
PALES_23241	214.9027055	0.845227406	0.244519988	3.456680217	5.47E-04	0.001449489	0.845227406	1.796547905	PALES_23241	hypothetical protein	NA	NA	NA
PALES_23131	82.23042435	1.020860189	0.305429171	3.34237946	8.31E-04	0.00212414	1.020860189	2.029128442	PALES_23131	hypothetical protein	NA	NA	NA
PALES_15821	698.1392896	0.955725725	0.288805206	3.309239948	9.35E-04	0.002367368	0.955725725	1.939555052	PALES_15821	hypothetical protein	NA	NA	NA
PALES_50751	140.0106059	0.905433456	0.275609264	3.2852069	0.001019075	0.002558449	0.905433456	1.873107184	PALES_50751	putative paraquat-inducible protein	NA	NA	NA
PALES_38651	11.77481652	1.996747658	0.608922279	3.279150276	0.001041202	0.002607117	1.996747658	3.990992751	PALES_38651	hypothetical protein	NA	NA	NA
PALES_34091	16.09781981	1.665487496	0.517898811	3.215855032	0.001300565	0.003181166	1.665487496	3.172208275	PALES_34091	hypothetical protein	NA	NA	NA
PALES_15831	169.4463909	0.957825729	0.298135047	3.212724364	0.001314824	0.003211088	0.957825729	1.942380346	PALES_15831	hypothetical protein	NA	NA	NA
PALES_13381	209.7197997	2.250541703	0.706706528	3.184549191	0.001449797	0.003508287	2.250541703	4.758614889	PALES_13381	hypothetical protein	NA	NA	NA
PALES_08271	341.2315005	1.124681584	0.370610593	3.034671983	0.002407974	0.005585326	1.124681584	2.180534148	PALES_08271	hypothetical protein	NA	NA	NA
PALES_23301	6.373012125	2.708206089	0.899908503	3.009423824	0.002617437	0.0060328	2.708206089	6.5350854	PALES_23301	hypothetical protein	NA	NA	NA
PALES_53841	23.61178674	-1.425445613	0.476247917	-2.993074744	0.002761821	0.006328896	1.425445613	-2.685974508	PALES_53841	asparagine synthetase (glutamine-hydrolyzing)	NA	NA	NA
PALES_13531	555.6558781	-0.86326404	0.29425484	-2.933729278	0.003349162	0.007519011	0.86326404	-1.819149411	PALES_13531	Putative Clp protease	NA	NA	NA
PALES_26621	18.42900814	-1.41424448	0.484597567	-2.918389557	0.003518445	0.007869335	1.41424448	-2.665201258	PALES_26621	AAA ATPase, central domain protein	NA	NA	NA
PALES_53611	9.624678566	1.876416169	0.644467415	2.911576483	0.003596099	0.008016619	1.876416169	3.671618514	PALES_53611	hypothetical protein	NA	NA	NA
PALES_15791	1051.217449	0.767031929	0.271789629	2.822153045	0.004770241	0.010371511	0.767031929	1.701765121	PALES_15791	protease (I) and scaffold (Z) proteins	NA	NA	NA
PALES_07981	89.09418284	1.071623438	0.379975565	2.820243027	0.004798729	0.010428682	1.071623438	2.101797151	PALES_07981	hypothetical protein	NA	NA	NA
PALES_07951	62.36662731	0.964459921	0.34271292	2.814191896	0.004890003	0.010588326	0.964459921	1.951332895	PALES_07951	transcriptional regulator, LuxR family	NA	NA	NA
PALES_37751.1	45.67660424	-0.971674232	0.34579885	-2.809940615	0.004955064	0.010709696	0.971674232	-1.961115128	PALES_37751.1	NA	NA	NA	NA
PALES_28971	10.78887106	-1.526738096	0.547606647	-2.788019658	0.005303133	0.011353622	1.526738096	-2.881336377	pvdD	peptide synthase	NA	NA	NA
PALES_32461	9.58752033	1.905710802	0.688875145	2.76640958	0.00566773	0.012068991	1.905710802	3.746934613	PALES_32461	hypothetical protein	NA	NA	NA
PALES_15891	118.7976961	0.720422574	0.265233091	2.716186629	0.006603868	0.013845411	0.720422574	1.647664575	orf48	hypothetical protein	NA	NA	NA
PALES_08051	36.3987106	1.122622105	0.41597859	2.698749723	0.00696005	0.014483605	1.122622105	2.177423609	PALES_08051	hypothetical protein	NA	NA	NA
PALES_07971	176.7900099	0.679713014	0.257096399	2.643806041	0.008197962	0.016715827	0.679713014	1.601821083	endY	EndY	NA	NA	NA
PALES_07941	95.68565734	0.765458623	0.290868565	2.631630627	0.008497619	0.017245489	0.765458623	1.699910303	PALES_07941	hypothetical protein	NA	NA	NA
PALES_56691	29.21476698	0.976979589	0.384492988	2.540955543	0.011054998	0.021939279	0.976979589	1.968340196	PALES_56691	hypothetical protein	NA	NA	NA
PALES_15941	375.1044429	0.810283882	0.319382828	2.537030208	0.011179731	0.022159722	0.810283882	1.753556459	PALES_15941	hypothetical protein	NA	NA	NA
PALES_26461	33.72805591	-1.217649821	0.481784478	-2.527374537	0.011491888	0.022730418	1.217649821	-2.325675513	PALES_26461	STY4579	NA	NA	NA
PALES_08011	98.96652526	0.933484878	0.370032582	2.522709953	0.011645441	0.023005431	0.933484878	1.909883817	PALES_08011	hypothetical protein	NA	NA	NA
PALES_15901	195.3978259	0.722184074	0.29025306	2.488118728	0.012842085	0.025139611	0.722184074	1.649677566	orf49	hypothetical protein	NA	NA	NA
PALES_13571	144.278489	0.946551897	0.381731555	2.479627068	0.013151986	0.025714512	0.946551897	1.927260912	PALES_13571	hypothetical protein	NA	NA	NA
PALES_08061	22.44687534	1.168287278	0.475789354	2.455471665	0.014069984	0.027262745	1.168287278	2.247447286	PALES_08061	hypothetical protein	NA	NA	NA
PALES_08161	113.733939	-0.731557451	0.30041479	-2.435157907	0.014885292	0.0286673	0.731557451	-1.660430631	PALES_08161	hypothetical protein	NA	NA	NA
PALES_00411	34.78970759	-1.003921828	0.413499981	-2.427864265	0.015188026	0.029191215	1.003921828	-2.005444204	PALES_00411	hypothetical protein	NA	NA	NA
PALES_23361	102.7406135	0.652585834	0.278534243	2.342928566	0.019133046	0.035860321	0.652585834	1.571983238	PALES_23361	hypothetical protein	NA	NA	NA
PALES_08211	667.4484798	0.804754401	0.345039726	2.332352888	0.019682134	0.036802418	0.804754401	1.746848389	PALES_08211	Putative tail length tape measure protein	NA	NA	NA
PALES_15931	290.6878615	0.641643186	0.277343969	2.313528533	0.020693598	0.038504444	0.641643186	1.56010506	PALES_15931	hypothetical protein	NA	NA	NA
PALES_00011	547.302674	-0.947246473	0.197044526	-4.807271191	1.53E-06	6.35E-06	0.947246473	-1.928189003	dnaN	DNA polymerase III subunit beta	PA0002	dnaN	DNA polymerase III, beta chain
PALES_00031	985.2441913	-0.745647971	0.200355877	-3.721617662	1.98E-04	5.75E-04	0.745647971	-1.676727184	gyrB	DNA gyrase subunit B	PA0004	gyrB	DNA gyrase subunit B
PALES_00041	87.35984603	-1.04521852	0.270335876	-3.866369997	1.10E-04	3.37E-04	1.04521852	-2.063678914	lptA	lysophosphatidic acid acyltransferase, LptA	PA0005	lptA	lysophosphatidic acid acyltransferase, LptA
PALES_00061	880.2322664	1.003627076	0.196766185	5.100607484	3.39E-07	1.54E-06	1.003627076	2.005034521	PALES_00061	hypothetical protein	PA0007	PA0007	hypothetical protein
PALES_00071	227.1507821	-1.12852179	0.219229089	-5.147682703	2.64E-07	1.22E-06	1.12852179	-2.186346086	glyS	glycyl-tRNA synthetase subunit beta	PA0008	glyS	glycyl-tRNA synthetase beta chain
PALES_00081	193.2695774	-0.862899207	0.270137748	-3.194293331	0.001401736	0.003407595	0.862899207	-1.818689438	glyQ	glycyl-tRNA synthetase subunit alpha	PA0009	glyQ	glycyl-tRNA synthetase alpha chain
PALES_00111	47.81987244	1.048990728	0.320279337	3.275236982	0.001055734	0.002640723	1.048990728	2.069081866	PALES_00111	hypothetical protein	PA0012	PA0012	hypothetical protein
PALES_00171	42.62307094	-0.937102345	0.314551357	-2.979171201	0.002890292	0.00659153	0.937102345	-1.914678739	fmt	methionyl-tRNA formyltransferase	PA0018	fmt	methionyl-tRNA formyltransferase
PALES_00191	435.6903295	-2.24397856	0.22320654	-10.05337281	8.88E-24	2.16E-22	2.24397856	-4.737016051	PALES_00191	putative lysin domain	PA0020	tsaP	T4P secretin-associated protein TsaP
PALES_00211	30.58611819	-1.37073187	0.393400339	-3.484317966	4.93E-04	0.001322482	1.37073187	-2.586017199	PALES_00211	putative translation factor	PA0022	PA0022	conserved hypothetical protein
PALES_00221	78.58689966	-1.324394895	0.301633674	-4.390739525	1.13E-05	4.06E-05	1.324394895	-2.504278295	qor	quinone oxidoreductase	PA0023	qor	quinone oxidoreductase
PALES_00231	177.4336668	-1.694828953	0.24642678	-6.877616774	6.09E-12	4.85E-11	1.694828953	-3.237385016	hemF	coproporphyrinogen III oxidase	PA0024	hemF	coproporphyrinogen III oxidase, aerobic
PALES_00241	52.56124106	-1.486957865	0.315569125	-4.711987786	2.45E-06	9.90E-06	1.486957865	-2.802973034	aroE	shikimate 5-dehydrogenase	PA0025	aroE	shikimate dehydrogenase
PALES_00251	157.1030613	-3.138542156	0.256551987	-12.23355233	2.06E-34	1.19E-32	3.138542156	-8.806337621	plcB	phospholipase C, PlcB	PA0026	plcB	phospholipase C, PlcB
PALES_00261	51.0615835	-2.846206337	0.36763051	-7.742029733	9.78E-15	1.03E-13	2.846206337	-7.191069421	PALES_00261	putative peptidyl-prolyl isomerase	PA0027	PA0027	hypothetical protein
PALES_00271	22.61371705	-3.223025235	0.486617084	-6.623329391	3.51E-11	2.60E-10	3.223025235	-9.337428139	PALES_00271	hypothetical protein	PA0028	PA0028	hypothetical protein
PALES_00311	33.73728886	1.359380881	0.366442432	3.709671054	2.08E-04	6.00E-04	1.359380881	2.565750492	PALES_00311	putative transcriptional regulator	PA0032	PA0032	probable transcriptional regulator
PALES_00371	248.0475083	1.381027123	0.248492746	5.557615441	2.73E-08	1.46E-07	1.381027123	2.604537344	PALES_00371	hypothetical protein	PA0038	PA0038	hypothetical protein
PALES_00381	1372.849407	0.64559031	0.186576713	3.460186958	5.40E-04	0.001432339	0.64559031	1.564379256	PALES_00381	hypothetical protein	PA0039	PA0039	hypothetical protein
PALES_00431	31.30628862	-1.306656994	0.359347717	-3.636191163	2.77E-04	7.81E-04	1.306656994	-2.473676761	PALES_00431	hypothetical protein	PA0042	PA0042	hypothetical protein
PALES_00461	60.71052339	-1.926904696	0.381513125	-5.05069045	4.40E-07	1.96E-06	1.926904696	-3.802385213	PALES_00461	putative lipoprotein	PA0045	PA0045	hypothetical protein
PALES_00471	12.32246321	-1.618722626	0.545019394	-2.970027567	0.00297773	0.006764982	1.618722626	-3.071030043	PALES_00471	putative lipoprotein	PA0046	PA0046	hypothetical protein
PALES_00491	24.19951453	-2.798553437	0.467921341	-5.980820258	2.22E-09	1.36E-08	2.798553437	-6.957424929	PALES_00491	putative transcriptional regulator	PA0048	PA0048	probable transcriptional regulator
PALES_00501	126.3462916	-5.600530836	0.40286667	-13.90169815	6.19E-44	7.00E-42	5.600530836	-48.52077995	PALES_00501	hypothetical protein	PA0049	PA0049	hypothetical protein
PALES_00521	115.7884639	-3.360731202	0.288417772	-11.65230276	2.23E-31	1.04E-29	3.360731202	-10.27261233	phzH	potential phenazine-modifying enzyme	PA0051	phzH	potential phenazine-modifying enzyme
PALES_00531	192.2046524	1.015278044	0.236362194	4.29543332	1.74E-05	6.07E-05	1.015278044	2.021292409	PALES_00531	hypothetical protein	PA0052	PA0052	hypothetical protein
PALES_00561	218.1302953	-0.772405057	0.256626036	-3.009846813	0.002613795	0.006027446	0.772405057	-1.708114939	PALES_00561	hypothetical protein	PA0055	PA0055	hypothetical protein
PALES_00631	78.5602106	-0.737293167	0.293008454	-2.516286331	0.011859879	0.023399885	0.737293167	-1.667045137	PALES_00631	putative lipoprotein	PA0062	PA0062	hypothetical protein
PALES_00661	37.97084116	-0.763514278	0.328696984	-2.322851488	0.020187132	0.037649627	0.763514278	-1.697620848	PALES_00661	putative phosphatase	PA0065	PA0065	hypothetical protein
PALES_00701	84.05217082	1.095311035	0.264292157	4.144319101	3.41E-05	1.14E-04	1.095311035	2.136591401	PALES_00701	putative DNA repair photolyase	PA0069	PA0069	conserved hypothetical protein
PALES_00711	779.6921392	-2.444675909	0.220720968	-11.0758662	1.64E-28	5.92E-27	2.444675909	-5.444033366	PALES_00711	hypothetical protein	PA0070	tagQ1	TagQ1
PALES_00731	15.07958731	-2.003110571	0.497320433	-4.027806698	5.63E-05	1.81E-04	2.003110571	-4.008633638	PALES_00731	putative permease	PA0072	tagS1	TagS1
PALES_00741	11.35140254	-1.874358639	0.566503296	-3.308645603	9.37E-04	0.002369876	1.874358639	-3.66638589	PALES_00741	putative ATP-binding component of ABC transporter	PA0073	tagT1	TagT1
PALES_00751	203.8820464	-1.959770548	0.228372768	-8.581454632	9.37E-18	1.32E-16	1.959770548	-3.890001058	ppkA	serine/threonine protein kinase PpkA	PA0074	ppkA	serine/threonine protein kinase PpkA
PALES_00761	534.6168359	-1.044476275	0.307086822	-3.40124095	6.71E-04	0.001755468	1.044476275	-2.062617454	PALES_00761	putative phosphoprotein phosphatase	PA0075	pppA	PppA
PALES_00771	24.27523059	-1.543436707	0.400306662	-3.855635822	1.15E-04	3.50E-04	1.543436707	-2.914880436	PALES_00771	hypothetical protein	PA0076	tagF1	TagF1
PALES_00781	199.3397342	-1.734657196	0.269488976	-6.436839156	1.22E-10	8.48E-10	1.734657196	-3.328004065	PALES_00781	hypothetical protein	PA0077	icmF1	IcmF1
PALES_00791	72.85231121	-1.575273648	0.291600716	-5.402159737	6.58E-08	3.33E-07	1.575273648	-2.979920098	PALES_00791	hypothetical protein	PA0078	tssL1	TssL1
PALES_00801	86.6821771	-1.197414668	0.305255934	-3.922658116	8.76E-05	2.73E-04	1.197414668	-2.293283425	PALES_00801	hypothetical protein	PA0079	tssK1	TssK1
PALES_00811	87.43619623	-0.962723918	0.256234258	-3.757202199	1.72E-04	5.04E-04	0.962723918	-1.948986257	PALES_00811	putative lipoprotein	PA0080	tssJ1	TssJ1
PALES_00841	234.0720931	-1.35673276	0.226015431	-6.00283243	1.94E-09	1.19E-08	1.35673276	-2.561045278	PALES_00841	hypothetical protein	PA0083	tssB1	TssB1
PALES_00851	1043.765327	-1.508105016	0.247049379	-6.104467946	1.03E-09	6.53E-09	1.508105016	-2.844361858	PALES_00851	hypothetical protein	PA0084	tssC1	TssC1
PALES_00861	456.6510592	-1.808937074	0.241834102	-7.480074384	7.43E-14	7.16E-13	1.808937074	-3.50384043	PALES_00861	hypothetical protein	PA0085	hcp1	Hcp1
PALES_00871	73.85006453	-1.416979742	0.274807264	-5.156267424	2.52E-07	1.17E-06	1.416979742	-2.670259112	PALES_00871	putative secretion protein	PA0086	tagJ1	TagJ1
PALES_00881	36.2890932	-1.094540219	0.345396249	-3.168940665	0.001529956	0.00369099	1.094540219	-2.135450149	PALES_00881	hypothetical protein	PA0087	tssE1	TssE1
PALES_00891	120.9047701	-1.650231783	0.270072937	-6.110318935	9.94E-10	6.31E-09	1.650231783	-3.138840637	PALES_00891	hypothetical protein	PA0088	tssF1	TssF1
PALES_00901	81.30767473	-1.757190324	0.279520948	-6.286435188	3.25E-10	2.14E-09	1.757190324	-3.380391458	PALES_00901	hypothetical protein	PA0089	tssG1	TssG1
PALES_00911	282.7853074	-1.657078867	0.208450439	-7.949510071	1.87E-15	2.12E-14	1.657078867	-3.153773098	PALES_00911	putative ClpA/B-type chaperone	PA0090	clpV1	ClpV1
PALES_00921	187.0783809	-1.800650285	0.244203355	-7.373568978	1.66E-13	1.56E-12	1.800650285	-3.483772187	PALES_00921	hypothetical protein	PA0091	vgrG1	VgrG1
PALES_00931	24.37422038	-1.181278976	0.395084737	-2.989938274	0.002790338	0.006388088	1.181278976	-2.267777306	PALES_00931	hypothetical protein	PA0092	tsi6	Tsi6
PALES_00941	41.36598205	-1.846551417	0.33810412	-5.461487476	4.72E-08	2.45E-07	1.846551417	-3.596394833	PALES_00941	hypothetical protein	PA0093	tse6	Tse6
PALES_00951	68.41686273	-1.300777422	0.273812644	-4.750611229	2.03E-06	8.32E-06	1.300777422	-2.463616033	PALES_00951	hypothetical protein	PA0094	eagT6	EagT6
PALES_01041	45.07137131	0.957899984	0.354545675	2.701767509	0.006897197	0.01437168	0.957899984	1.942480323	PALES_01041	putative sulfate transporter	PA0103	PA0103	probable sulfate transporter
PALES_01051	34.5657807	1.496548864	0.383816092	3.899130062	9.65E-05	2.98E-04	1.496548864	2.821669203	PALES_01051	hypothetical protein	PA0104	PA0104	hypothetical protein
PALES_01061	2187.825918	3.020630717	0.190000176	15.89804167	6.54E-57	1.55E-54	3.020630717	8.115222875	coxB	cytochrome c oxidase, subunit II	PA0105	coxB	cytochrome c oxidase, subunit II
PALES_01071	457.9756493	1.78734583	0.233084872	7.668218947	1.74E-14	1.79E-13	1.78734583	3.451792713	coxA	cytochrome c oxidase, subunit I	PA0106	coxA	cytochrome c oxidase, subunit I
PALES_01081	129.2219517	2.092954021	0.275558182	7.595325264	3.07E-14	3.09E-13	2.092954021	4.266207155	PALES_01081	cytochrome C oxidase assembly protein	PA0107	PA0107	conserved hypothetical protein
PALES_01091	297.0864797	1.874603044	0.221043089	8.480713219	2.24E-17	3.01E-16	1.874603044	3.66700706	coIII	cytochrome c oxidase, subunit III	PA0108	coIII	cytochrome c oxidase, subunit III
PALES_01101	63.15303185	1.854237076	0.318002871	5.830881562	5.51E-09	3.21E-08	1.854237076	3.615605006	PALES_01101	hypothetical protein	PA0109	PA0109	hypothetical protein
PALES_01111	288.702343	2.164875627	0.228518734	9.473514861	2.71E-21	5.32E-20	2.164875627	4.484277711	PALES_01111	hypothetical protein	PA0110	PA0110	hypothetical protein
PALES_01121	96.47615654	2.188426382	0.27805207	7.870563162	3.53E-15	3.96E-14	2.188426382	4.55808043	PALES_01121	hypothetical protein	PA0111	PA0111	hypothetical protein
PALES_01131	45.90708652	2.139915935	0.371072848	5.766835134	8.08E-09	4.63E-08	2.139915935	4.407363642	PALES_01131	putative cytochrome oxidase assembly protein	PA0112	PA0112	hypothetical protein
PALES_01141	45.72898275	1.251373239	0.324913832	3.851400327	1.17E-04	3.55E-04	1.251373239	2.380679217	PALES_01141	protoheme IX farnesyltransferase	PA0113	PA0113	probable cytochrome c oxidase assembly factor
PALES_01151	184.9051991	0.69970007	0.259023476	2.70129982	0.006906904	0.014385602	0.69970007	1.624167101	PALES_01151	putative Sco1/SenC family protein	PA0114	senC	SenC
PALES_01201	62.79548387	1.614629891	0.307023317	5.258981319	1.45E-07	6.99E-07	1.614629891	3.062330283	PALES_01201	C4-dicarboxylate transporter DctA	PA0119	PA0119	probable dicarboxylate transporter
PALES_01231	9283.578673	0.655005453	0.242061689	2.705944326	0.006811046	0.014229581	0.655005453	1.574621904	PALES_01231	putative hemolysin	PA0122	rahU	rahU
PALES_01241	15.18770616	-1.760962057	0.491268205	-3.584522752	3.38E-04	9.40E-04	1.760962057	-3.3892406	PALES_01241	putative transcriptional regulator	PA0123	PA0123	probable transcriptional regulator
PALES_01271	52.84988146	-2.895198788	0.371674652	-7.789605165	6.72E-15	7.26E-14	2.895198788	-7.439464547	PALES_01271	hypothetical protein	PA0126	PA0126	hypothetical protein
PALES_01341	36.13990257	0.9039824	0.339475666	2.662878345	0.007747542	0.01587228	0.9039824	1.871224168	PALES_01341	putative transcriptional regulator	PA0133	bauR	BauR
PALES_01351	92.46064214	1.099444765	0.271208336	4.053875273	5.04E-05	1.64E-04	1.099444765	2.14272212	PALES_01351	guanine deaminase	PA0134	PA0134	probable guanine deaminase
PALES_01371	113.4045868	1.60810621	0.299223757	5.374259797	7.69E-08	3.84E-07	1.60810621	3.048514082	PALES_01371	putative ATP-binding component of ABC transporter	PA0136	PA0136	probable ATP-binding component of ABC transporter
PALES_01381	87.0078295	7.13236754	0.87423909	8.158371805	3.40E-16	4.13E-15	7.13236754	140.2996442	PALES_01381	putative permease of ABC transporter	PA0137	PA0137	probable permease of ABC transporter
PALES_01391	35.75993601	4.159015867	0.566803682	7.337665572	2.17E-13	2.02E-12	4.159015867	17.86440386	PALES_01391	putative permease of ABC transporter	PA0138	PA0138	probable permease of ABC transporter
PALES_01401	1897.536842	-1.016736641	0.182751295	-5.563498964	2.64E-08	1.42E-07	1.016736641	-2.023337015	ahpC	alkyl hydroperoxide reductase subunit C	PA0139	ahpC	alkyl hydroperoxide reductase subunit C
PALES_01411	119.5854175	-1.590907016	0.279877532	-5.684297012	1.31E-08	7.34E-08	1.590907016	-3.012386774	ahpF	alkyl hydroperoxide reductase subunit F	PA0140	ahpF	alkyl hydroperoxide reductase subunit F
PALES_01421	515.2271311	-5.273836604	0.312987322	-16.85000071	1.05E-63	3.33E-61	5.273836604	-38.68859961	PALES_01421	hypothetical protein	PA0141	PA0141	conserved hypothetical protein
PALES_01441	245.8686743	-0.984591888	0.23510785	-4.187830768	2.82E-05	9.57E-05	0.984591888	-1.97875348	nuh	nonspecific ribonucleoside hydrolase	PA0143	nuh	purine nucleosidase Nuh
PALES_01451	58.07849545	2.387990066	0.33986592	7.026271015	2.12E-12	1.77E-11	2.387990066	5.234276244	PALES_01451	putative nucleoside 2-deoxyribosyltransferase	PA0144	PA0144	hypothetical protein
PALES_01471	61.56802629	3.847119684	0.41911771	9.179091206	4.35E-20	7.53E-19	3.847119684	14.39124682	PALES_01471	putative basic membrane protein (bmp)	PA0146	PA0146	conserved hypothetical protein
PALES_01481	82.01450658	1.861076561	0.289078521	6.437962087	1.21E-10	8.43E-10	1.861076561	3.63278645	PALES_01481	putative oxidoreductase	PA0147	PA0147	probable oxidoreductase
PALES_01501	34.17574942	2.800974913	0.439246888	6.376766669	1.81E-10	1.23E-09	2.800974913	6.969112349	PALES_01501	putative sigma-70 factor, ECF subfamily	PA0149	PA0149	probable sigma-70 factor, ECF subfamily
PALES_01511	37.51625513	1.886626892	0.377961318	4.991587237	5.99E-07	2.61E-06	1.886626892	3.697696695	PALES_01511	putative transmembrane sensor	PA0150	PA0150	anti-sigma factor
PALES_01521	34.01358893	2.587203809	0.428017866	6.044616388	1.50E-09	9.35E-09	2.587203809	6.009328584	PALES_01521	putative TonB-dependent receptor	PA0151	PA0151	probable TonB-dependent receptor
PALES_01541	18.49608681	1.142884193	0.494016258	2.313454617	0.020697657	0.038504444	1.142884193	2.20822043	pcaH	protocatechuate 3,4-dioxygenase, beta subunit	PA0153	pcaH	protocatechuate 3,4-dioxygenase, beta subunit
PALES_01561	80.46035242	0.679963431	0.305943475	2.222513267	0.026248638	0.047493256	0.679963431	1.602099145	pcaR	transcriptional regulator PcaR	PA0155	pcaR	transcriptional regulator PcaR
PALES_01581	83.29554324	-0.66640995	0.278368009	-2.393989	0.016666249	0.031572913	0.66640995	-1.587118611	PALES_01581	putative Resistance-Nodulation-Cell Division (RND) efflux membrane fusion protein precursor	PA0157	triB	Resistance-Nodulation-Cell Division (RND) triclosan efflux membrane fusion protein, TriB
PALES_01591	184.8044125	-0.807616817	0.232370501	-3.475556553	5.10E-04	0.001361074	0.807616817	-1.750317709	PALES_01591	putative Resistance-Nodulation-Cell Division (RND) efflux transporter	PA0158	triC	Resistance-Nodulation-Cell Division (RND) triclosan efflux transporter, TriC
PALES_01621	27.51857967	1.466485711	0.431599066	3.397796306	6.79E-04	0.001775766	1.466485711	2.763479117	PALES_01621	hypothetical protein	PA0161	PA0161	hypothetical protein
PALES_01651	22.09735998	1.164924848	0.430890591	2.70352816	0.006860763	0.014308303	1.164924848	2.242215353	PALES_01651	putative gamma-glutamyltranspeptidase	PA0164	PA0164	probable gamma-glutamyltranspeptidase
PALES_01661	164.0397537	1.145104899	0.268160893	4.270215859	1.95E-05	6.78E-05	1.145104899	2.211622109	PALES_01661	putative outer membrane protein	PA0165	PA0165	hypothetical protein
PALES_01671	42.12473464	2.983675212	0.419790347	7.107536498	1.18E-12	1.01E-11	2.983675212	7.909986388	PALES_01671	putative transporter	PA0166	PA0166	probable transporter
PALES_01761	161.8126834	0.962189871	0.237796155	4.046280187	5.20E-05	1.68E-04	0.962189871	1.948264929	PALES_01761	putative chemotaxis protein methyltransferase	PA0175	PA0175	probable chemotaxis protein methyltransferase
PALES_01781	215.3745737	0.93459326	0.2203945	4.240547109	2.23E-05	7.68E-05	0.93459326	1.91135169	PALES_01781	putative purine-binding chemotaxis protein	PA0177	PA0177	probable purine-binding chemotaxis protein
PALES_01791	487.0268751	0.883897737	0.208032233	4.248849921	2.15E-05	7.42E-05	0.883897737	1.845354176	PALES_01791	putative two-component sensor	PA0178	PA0178	probable two-component sensor
PALES_01801	562.6693571	1.416782894	0.194966502	7.266801637	3.68E-13	3.30E-12	1.416782894	2.669894793	PALES_01801	putative two-component response regulator	PA0179	PA0179	probable two-component response regulator
PALES_01811	287.5184162	0.624572186	0.21212378	2.944376085	0.003236065	0.007292649	0.624572186	1.541753568	PALES_01811	putative chemotaxis transducer	PA0180	cttP	chemotactic transducer for trichloroethylene [positive chemotaxis], CttP
PALES_01821	45.97783146	0.789661793	0.328701597	2.402366768	0.016289367	0.03095761	0.789661793	1.728669168	PALES_01821	putative transcriptional regulator	PA0181	PA0181	probable transcriptional regulator
PALES_01911	64.83556263	-1.060616954	0.37808378	-2.805243204	0.005027863	0.010842398	1.060616954	-2.085823312	PALES_01911	putative acid phosphatase	PA0190	PA0190	probable acid phosphatase
PALES_02001	8.951619796	1.871247489	0.669647874	2.794375317	0.005200009	0.011157961	1.871247489	3.658487904	exbD1	transport protein ExbD	PA0199	exbD1	transport protein ExbD
PALES_02011	160.3806091	-2.154025776	0.332338393	-6.481423223	9.09E-11	6.45E-10	2.154025776	-4.450679999	PALES_02011	hypothetical protein	PA0200	PA0200	hypothetical protein
PALES_02031	70.5301313	-1.046407088	0.281830444	-3.712895855	2.05E-04	5.92E-04	1.046407088	-2.065379781	mdcA	malonate decarboxylase alpha subunit	PA0208	mdcA	malonate decarboxylase alpha subunit
PALES_02071	16.92499665	-1.521992013	0.463773856	-3.281754663	0.001031633	0.002587245	1.521992013	-2.871873123	mdcE	malonate decarboxylase gamma subunit	PA0212	mdcE	malonate decarboxylase gamma subunit
PALES_02141	38.61787609	1.607648716	0.357175954	4.50099929	6.76E-06	2.52E-05	1.607648716	3.047547518	PALES_02141	putative transcriptional regulator	PA0218	PA0218	probable transcriptional regulator
PALES_02191	8.571440803	2.003003298	0.714716211	2.802515554	0.005070577	0.010919653	2.003003298	4.008335584	PALES_02191	putative binding protein component of ABC transporter	PA0222	PA0222	hypothetical protein
PALES_02201	11.34955428	-2.082026898	0.574234352	-3.625744248	2.88E-04	8.10E-04	2.082026898	-4.234016519	PALES_02201	putative dihydrodipicolinate synthetase	PA0223	PA0223	probable dihydrodipicolinate synthetase
PALES_02231	26.47916505	1.724718103	0.44797573	3.850025764	1.18E-04	3.56E-04	1.724718103	3.305155396	PALES_02231	putative CoA transferase, subunit A	PA0226	PA0226	probable CoA transferase, subunit A
PALES_02241	29.12050907	1.233743541	0.394813441	3.12487725	0.001778793	0.004233212	1.233743541	2.351764405	PALES_02241	putative CoA transferase, subunit B	PA0227	PA0227	probable CoA transferase, subunit B
PALES_02251	41.90476483	1.570063289	0.34593378	4.538623802	5.66E-06	2.14E-05	1.570063289	2.969177393	pcaF	beta-ketoadipyl CoA thiolase	PA0228	pcaF	beta-ketoadipyl CoA thiolase PcaF
PALES_02321	30.57018957	-1.006180263	0.450240719	-2.234760696	0.025433063	0.046211011	1.006180263	-2.008586041	pcaK	4-hydroxybenzoate transporter PcaK	PA0235	pcaK	4-hydroxybenzoate transporter PcaK
PALES_02331	16.57585085	-1.880763867	0.474015098	-3.967729875	7.26E-05	2.29E-04	1.880763867	-3.682699974	PALES_02331	putative transcriptional regulator	PA0236	PA0236	probable transcriptional regulator
PALES_02361	9.065292195	2.635034517	0.754830528	3.490895533	4.81E-04	0.001294727	2.635034517	6.211899619	PALES_02361	putative permease	PA0239	PA0239	hypothetical protein
PALES_02371	48.90091503	-1.4474499	0.431640959	-3.353365496	7.98E-04	0.002047553	1.4474499	-2.727255568	PALES_02371	putative porin	PA0240	PA0240	probable porin
PALES_02451	16.73908894	1.254398593	0.477967844	2.624441392	0.008679123	0.017576333	1.254398593	2.385676777	PALES_02451	putative transcriptional regulator	PA0248	PA0248	probable transcriptional regulator
PALES_02501	18.16981072	-1.125099542	0.4430117	-2.539661015	0.011095996	0.022011456	1.125099542	-2.181165955	PALES_02501	putative transcriptional regulator	PA0253	hudR	HudR
PALES_02531	329.2602648	2.072216171	0.224427123	9.233358889	2.62E-20	4.67E-19	2.072216171	4.205321707	PALES_02531	hypothetical protein	PA0256	PA0256	hypothetical protein
PALES_02541	36.92140591	0.772603073	0.343785707	2.247339133	0.024618362	0.044885088	0.772603073	1.7083494	PALES_02541	hypothetical protein	PA0258	PA0258	hypothetical protein
PALES_02561	374.3360233	-0.840875755	0.315130783	-2.668338994	0.00762273	0.015657055	0.840875755	-1.791137081	PALES_02561	hypothetical protein	PA0260	tle3	Tle3
PALES_56611	21.7295049	-1.72732051	0.454355326	-3.801695304	1.44E-04	4.26E-04	1.72732051	-3.311122785	hcpB	secreted protein Hcp	PA0263	hcpC	secreted protein Hcp
PALES_02611	545.1727298	-0.590519736	0.216212167	-2.731204932	0.006310322	0.01332397	0.590519736	-1.505789116	gabD	succinate-semialdehyde dehydrogenase I	PA0265	davD	glutaric semialdehyde dehydrogenase
PALES_02641	16.46875584	-1.356722041	0.462360626	-2.934337323	0.003342607	0.007511388	1.356722041	-2.561026251	PALES_02641	putative transcriptional regulator	PA0268	PA0268	probable transcriptional regulator
PALES_02651	117.3906764	-2.569536919	0.289980699	-8.861061881	7.93E-19	1.23E-17	2.569536919	-5.93618856	PALES_02651	putative decarboxylase	PA0269	PA0269	conserved hypothetical protein
PALES_02661	29.71261097	-1.82114837	0.406565521	-4.479347795	7.49E-06	2.77E-05	1.82114837	-3.533623593	PALES_02661	hypothetical protein	PA0270	PA0270	hypothetical protein
PALES_02671	18.53460784	-1.637931082	0.480679749	-3.40753087	6.56E-04	0.001719288	1.637931082	-3.112192032	PALES_02671	hypothetical protein	PA0271	PA0271	hypothetical protein
PALES_02691	8.653973135	2.506448271	0.754596648	3.321573556	8.95E-04	0.002268799	2.506448271	5.682194718	PALES_02691	putative major facilitator superfamily (MFS) transporter	PA0273	PA0273	probable major facilitator superfamily (MFS) transporter
PALES_02701	16.57277704	1.583962898	0.499725023	3.169668968	0.001526127	0.003683621	1.583962898	2.997922104	PALES_02701	hypothetical protein	PA0274	PA0274	hypothetical protein
PALES_02731	56.09290386	-2.480466666	0.347477513	-7.138495519	9.44E-13	8.16E-12	2.480466666	-5.580779579	PALES_02731	putative putative Zn-dependent protease with chaperone function	PA0277	PA0277	conserved hypothetical protein
PALES_02761	69.86119612	-1.799781107	0.346522446	-5.193837012	2.06E-07	9.71E-07	1.799781107	-3.481673956	cysA	sulfate transport protein CysA	PA0280	cysA	sulfate transport protein CysA
PALES_02771	93.13056892	-1.430896963	0.357020808	-4.007881136	6.13E-05	1.96E-04	1.430896963	-2.696142898	cysW	sulfate transport protein CysW	PA0281	cysW	sulfate transport protein CysW
PALES_02781	31.00297363	-1.956783869	0.392873207	-4.980700731	6.34E-07	2.75E-06	1.956783869	-3.881956277	cysT	sulfate transport protein CysT	PA0282	cysT	sulfate transport protein CysT
PALES_02791	189.9459756	-2.511991673	0.333734586	-7.526914426	5.20E-14	5.09E-13	2.511991673	-5.704069947	sbp	sulfate-binding protein precursor	PA0283	sbp	sulfate-binding protein precursor
PALES_02801	46.17183748	-2.175185244	0.372958371	-5.832246746	5.47E-09	3.19E-08	2.175185244	-4.516437498	PALES_02801	hypothetical protein	PA0284	PA0284	hypothetical protein
PALES_02811	58.81561778	-1.233426548	0.285581785	-4.318995869	1.57E-05	5.51E-05	1.233426548	-2.351247725	PALES_02811	putative sensory box/GGDEF domain/EAL domain protein	PA0285	PA0285	conserved hypothetical protein
PALES_02821	1272.13176	1.009795865	0.254414711	3.969093853	7.21E-05	2.28E-04	1.009795865	2.01362616	desA	delta-9 fatty acid desaturase, DesA	PA0286	desA	delta-9 fatty acid desaturase, DesA
PALES_02831	7.390117893	3.085884386	0.899177365	3.431897318	5.99E-04	0.001580713	3.085884386	8.490705223	gpuP	3-guanidinopropionate transport protein	PA0287	gpuP	3-guanidinopropionate transport protein
PALES_02841	13.83259287	1.592752232	0.546626278	2.913786431	0.003570741	0.007971302	1.592752232	3.016242101	gpuA	3-guanidinopropionase	PA0288	gpuA	3-guanidinopropionase
PALES_02861	156.3083437	0.743246066	0.232753201	3.193279673	0.001406666	0.003417833	0.743246066	1.673937968	PALES_02861	putative sensory box/GGDEF domain protein	PA0290	PA0290	hypothetical protein
PALES_02871	290.2848499	-2.077817603	0.258044954	-8.052153591	8.13E-16	9.48E-15	2.077817603	-4.221681098	oprE	Anaerobically-induced outer membrane porin OprE precursor	PA0291	oprE	Anaerobically-induced outer membrane porin OprE precursor
PALES_02901	208.5749983	-0.886343722	0.254371706	-3.484443051	4.93E-04	0.001322482	0.886343722	-1.848485494	aguR	transcriptional regulator AguR	PA0294	aguR	transcriptional regulator AguR
PALES_02911	68.55027013	-0.970640457	0.286858695	-3.383688465	7.15E-04	0.001856296	0.970640457	-1.959710378	PALES_02911	putative periplasmic polyamine binding protein	PA0295	PA0295	probable periplasmic polyamine binding protein
PALES_02921	904.4561594	0.751374538	0.224128647	3.352425259	8.01E-04	0.002053413	0.751374538	1.683395934	PALES_02921	putative glutamine synthetase	PA0296	spuI	Glutamylpolyamine synthetase
PALES_02931	169.4177129	1.824142299	0.266675454	6.840308202	7.90E-12	6.21E-11	1.824142299	3.5409643	spuA	putative glutamine amidotransferase	PA0297	spuA	probable glutamine amidotransferase
PALES_02961	1913.930759	0.960031334	0.217768605	4.408492827	1.04E-05	3.76E-05	0.960031334	1.945352146	spuD	polyamine transport protein	PA0300	spuD	polyamine transport protein
PALES_02971	442.2279915	1.21878771	0.255457256	4.771004469	1.83E-06	7.55E-06	1.21878771	2.327510555	spuE	polyamine transport protein	PA0301	spuE	polyamine transport protein
PALES_02981	240.904558	1.007936303	0.234245683	4.302902362	1.69E-05	5.90E-05	1.007936303	2.011032369	spuF	polyamine transport protein PotG	PA0302	spuF	polyamine transport protein PotG
PALES_03011	71.7393188	-0.788816693	0.265425201	-2.971898257	0.002959647	0.006733552	0.788816693	-1.727656847	PALES_03011	putative penicillin amidase	PA0305	hacB	acylhomoserine lactone acylase B
PALES_03061	52.29567931	1.45747544	0.320303523	4.550294752	5.36E-06	2.04E-05	1.45747544	2.746273748	PALES_03061	putative proline hydroxylase	PA0310	PA0310	hypothetical protein
PALES_03081	96.21141555	0.699940686	0.261693545	2.674657821	0.007480556	0.015418311	0.699940686	1.624438005	PALES_03081	hypothetical protein	PA0312	PA0312	conserved hypothetical protein
PALES_03091	57.73713292	0.956916726	0.292536482	3.271102187	0.001071292	0.002676822	0.956916726	1.941156891	PALES_03091	putative permease of ABC transporter	PA0313	PA0313	L-cysteine transporter of ABC system YecS
PALES_03101	264.9949879	0.707341238	0.21955499	3.221704229	0.001274306	0.003124974	0.707341238	1.632792248	PALES_03101	putative binding protein component of ABC transporter	PA0314	PA0314	L-cysteine transporter of ABC system FliY
PALES_03151	98.40596122	-0.835530845	0.264950731	-3.153532889	0.001613071	0.003869904	0.835530845	-1.784513537	PALES_03151	putatitve transcriptional regulator	PA0319	PA0319	hypothetical protein
PALES_03191	34.09380896	2.133003738	0.412803931	5.16711101	2.38E-07	1.11E-06	2.133003738	4.38629772	PALES_03191	putative binding protein component of ABC transporter	PA0323	PA0323	probable binding protein component of ABC transporter
PALES_03201	6.573610688	3.158579564	1.001504189	3.1538356	0.001611398	0.003867844	3.158579564	8.929501044	PALES_03201	putative permease of ABC transporter	PA0324	PA0324	probable permease of ABC transporter
PALES_03221	27.02027101	3.403841726	0.545687048	6.237717644	4.44E-10	2.91E-09	3.403841726	10.58421029	PALES_03221	putative ATP-binding component of ABC transporter	PA0326	PA0326	probable ATP-binding component of ABC transporter
PALES_03231	73.91591955	1.958881379	0.292321476	6.701120298	2.07E-11	1.57E-10	1.958881379	3.887604293	PALES_03231	putative transcriptional regulator	PA0327	carP	calcium-regulated beta-propeller protein CarP
PALES_03261	680.5171402	0.658217983	0.220433127	2.98602117	0.002826331	0.006461155	0.658217983	1.578132111	PALES_03261	hypothetical protein	PA0329	PA0329	conserved hypothetical protein
PALES_03281	164.4775144	-0.626796998	0.243727843	-2.571708634	0.010119802	0.020226843	0.626796998	-1.544132976	ilvA1	threonine dehydratase	PA0331	ilvA1	threonine dehydratase, biosynthetic
PALES_03291	94.25949632	1.135317561	0.327364658	3.468051705	5.24E-04	0.001396522	1.135317561	2.196669098	PALES_03291	putative integral membrane protein	PA0332	PA0332	hypothetical protein
PALES_03301	61.55063072	1.059389901	0.360284138	2.940428928	0.003277582	0.00738271	1.059389901	2.084050015	PALES_03301	putative epimerase	PA0333	PA0333	hypothetical protein
PALES_03431	11.22739214	-2.363587324	0.602765898	-3.921235977	8.81E-05	2.74E-04	2.363587324	-5.146484651	PALES_03431	hypothetical protein	PA0346	PA0346	hypothetical protein
PALES_03471	12.81456497	-1.733392733	0.520248076	-3.331858039	8.63E-04	0.00219244	1.733392733	-3.325088484	folA	dihydrofolate reductase	PA0350	folA	dihydrofolate reductase
PALES_03481	38.86585732	0.937585028	0.362024187	2.589840846	0.009602031	0.019264835	0.937585028	1.915319441	PALES_03481	putative phosphoesterase	PA0351	PA0351	conserved hypothetical protein
PALES_03501	443.3712948	0.831897518	0.208004124	3.999427992	6.35E-05	2.02E-04	0.831897518	1.780025018	ilvD	dihydroxy-acid dehydratase	PA0353	ilvD	dihydroxy-acid dehydratase
PALES_03551	21.90251825	-1.169113561	0.406495813	-2.876077743	0.004026505	0.008888595	1.169113561	-2.248734849	PALES_03551	putative phosphate acyltransferase	PA0358	PA0358	hypothetical protein
PALES_03601	106.7773552	-1.321365009	0.247163347	-5.346120396	8.99E-08	4.46E-07	1.321365009	-2.499024437	coaD	phosphopantetheine adenylyltransferase	PA0363	coaD	phosphopantetheine adenylyltransferase
PALES_03641	101.5127712	1.697938695	0.290684147	5.84118092	5.18E-09	3.03E-08	1.697938695	3.244370755	PALES_03641	putative transcriptional regulator	PA0367	laoR	LaoR
PALES_03681	96.54206741	-0.791192063	0.246640573	-3.207874741	0.001337197	0.003262377	0.791192063	-1.730503745	PALES_03681	putative peptidase	PA0371	PA0371	hypothetical protein
PALES_03761	17.56430997	-0.987591644	0.445642544	-2.216107185	0.026684162	0.04818034	0.987591644	-1.982872128	PALES_03761	hypothetical protein	PA0379	PA0379	conserved hypothetical protein
PALES_03771	25.83907479	-1.873258665	0.405648344	-4.617937412	3.88E-06	1.51E-05	1.873258665	-3.663591543	PALES_03771	sulfur carrier protein ThiS	PA0380	PA0380	conserved hypothetical protein
PALES_03781	173.980035	-1.745803903	0.222834977	-7.834514688	4.71E-15	5.19E-14	1.745803903	-3.353816842	thiG	thiazole synthase	PA0381	thiG	thiamine biosynthesis protein, thiazole moiety
PALES_03791	36.48241686	-1.554219723	0.364827485	-4.260149764	2.04E-05	7.08E-05	1.554219723	-2.936748506	trmB	tRNA (guanine-N(7)-)-methyltransferase	PA0382	micA	DNA mismatch repair protein MicA
PALES_03801	23.23617451	-1.165110091	0.411088831	-2.834205173	0.004593983	0.010020757	1.165110091	-2.242503274	PALES_03801	hypothetical protein	PA0383	PA0383	conserved hypothetical protein
PALES_03811	33.16117785	1.65696433	0.375618855	4.41129168	1.03E-05	3.72E-05	1.65696433	3.153522727	PALES_03811	hypothetical protein	PA0384	PA0384	hypothetical protein
PALES_03821	16.70160061	-1.10512684	0.449625537	-2.457882725	0.01397588	0.027102493	1.10512684	-2.151177901	PALES_03821	hypothetical protein	PA0385	PA0385	hypothetical protein
PALES_03831	40.60603574	-0.825800666	0.341011292	-2.421622645	0.015451386	0.029601668	0.825800666	-1.772518477	PALES_03831	coproporphyrinogen III oxidase	PA0386	PA0386	probable oxidase
PALES_03841	188.4520904	-0.735756236	0.237012542	-3.104292412	0.001907347	0.004507672	0.735756236	-1.665270147	PALES_03841	putative deoxyribonucleotide triphosphate pyrophosphatase	PA0387	PA0387	conserved hypothetical protein
PALES_03851	503.0158812	-0.769938404	0.216619045	-3.554343075	3.79E-04	0.001040292	0.769938404	-1.705196978	PALES_03851	hypothetical protein	PA0388	PA0388	hypothetical protein
PALES_03861	81.35828263	-2.042728372	0.293788303	-6.953062289	3.57E-12	2.88E-11	2.042728372	-4.120239989	PALES_03861	putative methionine biosynthesis protein	PA0389	PA0389	hypothetical protein
PALES_03871	88.05440275	-1.572422915	0.259046268	-6.070046577	1.28E-09	8.05E-09	1.572422915	-2.974037657	metX	homoserine O-acetyltransferase	PA0390	metX	homoserine O-acetyltransferase
PALES_03881	216.131103	-0.951561245	0.241550755	-3.939384277	8.17E-05	2.56E-04	0.951561245	-1.93396441	PALES_03881	hypothetical protein	PA0391	PA0391	hypothetical protein
PALES_03901	110.6449582	1.249220733	0.253329861	4.931202062	8.17E-07	3.51E-06	1.249220733	2.377129884	PALES_03901	putative YGGT family protein	PA0392	PA0392	conserved hypothetical protein
PALES_03911	87.20172466	1.023200865	0.315421384	3.243917237	0.00117898	0.002921339	1.023200865	2.032423239	proC	pyrroline-5-carboxylate reductase	PA0393	proC	pyrroline-5-carboxylate reductase
PALES_03921	411.4592007	1.916764319	0.250266569	7.65889078	1.88E-14	1.92E-13	1.916764319	3.775752814	PALES_03921	putative PLP dependent enzyme	PA0394	PA0394	conserved hypothetical protein
PALES_03931	601.2116547	0.676040637	0.206852395	3.268227259	0.001082234	0.002701325	0.676040637	1.597748836	pilT	twitching motility protein PilT	PA0395	pilT	twitching motility protein PilT
PALES_03941	468.5575013	0.750188085	0.198861911	3.772407108	1.62E-04	4.75E-04	0.750188085	1.682012101	pilU	twitching motility protein PilU	PA0396	pilU	twitching motility protein PilU
PALES_03951	40.80398228	1.070867858	0.347698125	3.079878152	0.002070853	0.004857872	1.070867858	2.100696668	PALES_03951	putative cation efflux system protein	PA0397	PA0397	probable cation efflux system protein
PALES_03971	233.7440314	-1.429316572	0.235781508	-6.062038468	1.34E-09	8.44E-09	1.429316572	-2.693191043	PALES_03971	cystathionine beta-synthase	PA0399	PA0399	cystathionine beta-synthase
PALES_03981	299.4795915	-1.783360648	0.23100641	-7.719961741	1.16E-14	1.22E-13	1.783360648	-3.442270921	PALES_03981	putative cystathionine gamma-lyase	PA0400	PA0400	probable cystathionine gamma-lyase
PALES_03991	191.6547714	-0.951328544	0.241428014	-3.940423191	8.13E-05	2.55E-04	0.951328544	-1.933652494	pyrC	dihydroorotase	PA0401	PA0401	noncatalytic dihydroorotase-like protein
PALES_04001	85.41164428	-0.865699099	0.259712178	-3.333301908	8.58E-04	0.002185766	0.865699099	-1.822222463	pyrB	aspartate carbamoyltransferase catalytic subunit	PA0402	pyrB	aspartate carbamoyltransferase
PALES_04011	49.44359092	-1.094429136	0.308010524	-3.553219937	3.81E-04	0.001042938	1.094429136	-2.135285732	pyrR	bifunctional pyrimidine regulatory protein PyrR uracil phosphoribosyltransferase	PA0403	pyrR	transcriptional regulator PyrR
PALES_04041	42.16522223	-1.112844784	0.314139765	-3.54251485	3.96E-04	0.001083077	1.112844784	-2.162716833	PALES_04041	putative tonB domain protein	PA0406	tonB3	TonB3
PALES_04051	231.0469062	0.721258387	0.216033384	3.338643198	8.42E-04	0.002147623	0.721258387	1.648619412	gshB	glutathione synthetase	PA0407	gshB	glutathione synthetase
PALES_04061	436.2556491	-1.074033546	0.205515147	-5.226055409	1.73E-07	8.24E-07	1.074033546	-2.105311261	pilG	twitching motility protein PilG	PA0408	pilG	twitching motility protein PilG
PALES_04071	377.3330224	-1.25062863	0.204611165	-6.112220867	9.83E-10	6.27E-09	1.25062863	-2.37945081	pilH	twitching motility protein PilH	PA0409	pilH	twitching motility protein PilH
PALES_04081	52.80130063	-1.470695941	0.299376565	-4.912528613	8.99E-07	3.84E-06	1.470695941	-2.771555584	pilI	twitching motility protein PilI	PA0410	pilI	twitching motility protein PilI
PALES_04091	502.2540611	-1.706470548	0.205816627	-8.291218111	1.12E-16	1.42E-15	1.706470548	-3.263614258	pilJ	twitching motility protein PilJ	PA0411	pilJ	twitching motility protein PilJ
PALES_04101	70.57769035	-0.689527995	0.277180271	-2.487651778	0.012858957	0.02516228	0.689527995	-1.612755788	pilK	methyltransferase PilK	PA0412	pilK	methyltransferase PilK
PALES_04111	537.5213529	-1.326212462	0.205684161	-6.447810336	1.13E-10	7.95E-10	1.326212462	-2.507435277	chpA	still frameshift putative component of chemotactic signal transduction system	PA0413	chpA	component of chemotactic signal transduction system
PALES_04121	48.65451951	-1.060515989	0.312284894	-3.395988756	6.84E-04	0.001785571	1.060515989	-2.085677344	chpB	putative methylesterase	PA0414	chpB	probable methylesterase
PALES_04131	26.48158818	-0.845048798	0.373051587	-2.265233086	0.02349838	0.043024565	0.845048798	-1.796325504	chpC	putative chemotaxis protein	PA0415	chpC	probable chemotaxis protein
PALES_04141	15.54061215	-1.175197076	0.479314551	-2.451828498	0.014213239	0.027495504	1.175197076	-2.25823727	chpD	putative transcriptional regulator	PA0416	chpD	probable transcriptional regulator
PALES_04161	39.36665397	-1.170017533	0.34185424	-3.422562592	6.20E-04	0.001634187	1.170017533	-2.250144315	PALES_04161	hypothetical protein	PA0418	PA0418	hypothetical protein
PALES_04171	22.11639842	-2.079645534	0.430623865	-4.829378265	1.37E-06	5.72E-06	2.079645534	-4.227033465	PALES_04171	16S ribosomal RNA methyltransferase RsmE	PA0419	PA0419	conserved hypothetical protein
PALES_04181	100.1861447	-1.063498108	0.25707552	-4.136909287	3.52E-05	1.18E-04	1.063498108	-2.089992996	bioA	adenosylmethionine--8-amino-7-oxononanoate transaminase	PA0420	bioA	adenosylmethionine-8-amino-7-oxononanoate aminotransferase
PALES_04191	218.1289049	-1.212472568	0.252179097	-4.807982041	1.52E-06	6.34E-06	1.212472568	-2.317344556	PALES_04191	putative monoamine oxidase	PA0421	PA0421	hypothetical protein
PALES_04211	990.045828	-1.232625281	0.231428341	-5.326163935	1.00E-07	4.95E-07	1.232625281	-2.349942214	pasP	hypothetical protein	PA0423	pasP	PasP
PALES_04261	1202.811651	0.652255607	0.182744726	3.569217135	3.58E-04	9.90E-04	0.652255607	1.571623458	PALES_04261	putative ATP-dependent RNA helicase	PA0428	PA0428	probable ATP-dependent RNA helicase
PALES_04281	148.3605472	-1.522252465	0.232505423	-6.547169714	5.86E-11	4.24E-10	1.522252465	-2.872391632	metF	5,10-methylenetetrahydrofolate reductase	PA0430	metF	5,10-methylenetetrahydrofolate reductase
PALES_04291	173.908375	-1.246692177	0.241240589	-5.167837552	2.37E-07	1.11E-06	1.246692177	-2.372967229	PALES_04291	hypothetical protein	PA0431	PA0431	hypothetical protein
PALES_04301	1389.967525	-1.299737712	0.20597136	-6.310283684	2.79E-10	1.85E-09	1.299737712	-2.461841212	sahH	S-adenosyl-L-homocysteine hydrolase	PA0432	sahH	S-adenosyl-L-homocysteine hydrolase
PALES_04371	46.44786055	4.758790993	0.582390208	8.171138407	3.05E-16	3.72E-15	4.758790993	27.07315265	PALES_04371	dihydropyrimidine dehydrogenase	PA0439	PA0439	probable oxidoreductase
PALES_04391	278.747205	6.217380913	0.400841019	15.51084002	2.93E-54	6.63E-52	6.217380913	74.40774607	dht	phenylhydantoinase	PA0441	dht	dihydropyrimidinase
PALES_04401	71.37809773	3.92345074	0.406621367	9.648904499	4.97E-22	1.03E-20	3.92345074	15.17317124	PALES_04401	putative transporter	PA0443	PA0443	probable transporter
PALES_04411	76.6153061	5.041411662	0.515472031	9.780184676	1.37E-22	3.03E-21	5.041411662	32.93185015	PALES_04411	allantoate amidohydrolase	PA0444	PA0444	N-carbamoyl-beta-alanine amidohydrolase
PALES_04421	194.5083771	-1.88920995	0.240824084	-7.844771672	4.34E-15	4.81E-14	1.88920995	-3.704323128	PALES_04421	putative acyl-CoA transferase	PA0446	PA0446	conserved hypothetical protein
PALES_04431	658.1345856	-2.608833543	0.210466869	-12.39545946	2.77E-35	1.73E-33	2.608833543	-6.100102748	gcdH	glutaryl-CoA dehydrogenase	PA0447	gcdH	glutaryl-CoA dehydrogenase
PALES_04451	231.9072238	-0.931232285	0.238971051	-3.896841394	9.75E-05	3.00E-04	0.931232285	-1.906904093	PALES_04451	putative long-chain acyl-CoA thioester hydrolase family protein	PA0449	PA0449	hypothetical protein
PALES_04471	279.4365958	1.544261745	0.310842972	4.967980252	6.77E-07	2.93E-06	1.544261745	2.916547853	PALES_04471	putative membrane-bound protease	PA0451	PA0451	conserved hypothetical protein
PALES_04501	79.57428653	0.814767568	0.268543478	3.034024781	0.002413146	0.005594171	0.814767568	1.759014734	PALES_04501	hypothetical protein	PA0454	PA0454	conserved hypothetical protein
PALES_04511	142.6425066	0.63094943	0.242268767	2.60433665	0.009205229	0.018554838	0.63094943	1.548583773	dbpA	ATP-dependent RNA helicase DbpA	PA0455	dbpA	RNA helicase DbpA
PALES_04521	9863.63093	0.849404172	0.275556251	3.082507364	0.002052647	0.004817539	0.849404172	1.801756653	PALES_04521	putative cold-shock protein	PA0456	PA0456	probable cold-shock protein
PALES_04571	128.2566858	-1.373443508	0.249324233	-5.508664321	3.62E-08	1.89E-07	1.373443508	-2.590882354	PALES_04571	putative acyltransferase	PA0461	PA0461	conserved hypothetical protein
PALES_04641	74.15020327	-0.716475443	0.296770867	-2.41423779	0.015768168	0.030066655	0.716475443	-1.64316282	PALES_04641	putative streptogramin lyase	PA0468	PA0468	hypothetical protein
PALES_04661	119.2163542	2.355966367	0.308859375	7.627958098	2.39E-14	2.42E-13	2.355966367	5.119370309	fiuA	Ferrichrome receptor FiuA	PA0470	fiuA	Ferrichrome receptor FiuA
PALES_04671	52.55568872	1.508327402	0.345347426	4.367565209	1.26E-05	4.49E-05	1.508327402	2.844800341	PALES_04671	putative transmembrane sensor	PA0471	fiuR	FiuR
PALES_04681	114.3448088	1.511657035	0.253456499	5.964167593	2.46E-09	1.49E-08	1.511657035	2.85137351	PALES_04681	RNA polymerase sigma factor	PA0472	fiuI	FiuI
PALES_04721	26.62010329	2.397486964	0.452594321	5.297209563	1.18E-07	5.75E-07	2.397486964	5.268845823	PALES_04721	putative permease	PA0476	PA0476	probable permease
PALES_04781	474.3167759	-1.035505116	0.209029622	-4.953867822	7.28E-07	3.14E-06	1.035505116	-2.049831207	glcB	malate synthase G	PA0482	glcB	malate synthase G
PALES_04791	82.65727761	1.363231835	0.27986455	4.871041488	1.11E-06	4.68E-06	1.363231835	2.572608341	PALES_04791	putative acetyltransferase	PA0483	PA0483	probable acetyltransferase
PALES_04801	278.2666896	1.27396273	0.230138953	5.535624074	3.10E-08	1.64E-07	1.27396273	2.418248879	PALES_04801	putative ACT domain protein	PA0484	PA0484	conserved hypothetical protein
PALES_04811	59.35514649	3.024240857	0.362193961	8.349782675	6.84E-17	8.84E-16	3.024240857	8.135555499	PALES_04811	putative permease	PA0485	PA0485	conserved hypothetical protein
PALES_04851	29.02730929	0.851352967	0.378558546	2.24893342	0.024516732	0.044734099	0.851352967	1.804192112	PALES_04851	putative phosphoribosyl transferase	PA0489	PA0489	probable phosphoribosyl transferase
PALES_04861	34.9195212	1.030068583	0.366378356	2.811488633	0.004931283	0.010667995	1.030068583	2.042121327	PALES_04861	hypothetical protein	PA0490	PA0490	hypothetical protein
PALES_04871	38.30300412	1.915389414	0.391196294	4.896236092	9.77E-07	4.14E-06	1.915389414	3.77215619	PALES_04871	putative transcriptional regulator	PA0491	PA0491	probable transcriptional regulator
PALES_04881	12.69073547	1.50132757	0.545680441	2.75129445	0.005936026	0.012589565	1.50132757	2.831031044	PALES_04881	hypothetical protein	PA0492	PA0492	conserved hypothetical protein
PALES_04961	443.4076115	-0.844640699	0.211479285	-3.993964226	6.50E-05	2.07E-04	0.844640699	-1.795817445	bioB	biotin synthase	PA0500	bioB	biotin synthase
PALES_04971	90.12016184	-0.599573845	0.25848702	-2.319551074	0.020365175	0.037945301	0.599573845	-1.515268908	bioF	8-amino-7-oxononanoate synthase	PA0501	bioF	8-amino-7-oxononanoate synthase
PALES_05011	634.9878443	2.140131264	0.246984261	8.665051178	4.51E-18	6.58E-17	2.140131264	4.40802151	PALES_05011	hypothetical protein	PA0505	PA0505	hypothetical protein
PALES_05071	67.98275167	-1.265955345	0.28370082	-4.462290052	8.11E-06	2.97E-05	1.265955345	-2.40486406	PALES_05071	putative uroporphyrin-III c-methyltransferase	PA0510	nirE	NirE
PALES_05081	129.6542149	-1.013535766	0.239015732	-4.240456297	2.23E-05	7.68E-05	1.013535766	-2.018852859	nirJ	heme d1 biosynthesis protein NirJ	PA0511	nirJ	heme d1 biosynthesis protein NirJ
PALES_05101	21.64396381	-1.327033963	0.414409908	-3.20222547	0.001363702	0.003321928	1.327033963	-2.50886347	PALES_05101	putative transcriptional regulator	PA0513	nirG	NirG
PALES_05111	71.38177447	-1.309953511	0.287466849	-4.556885487	5.19E-06	1.98E-05	1.309953511	-2.479335506	nirL	heme d1 biosynthesis protein NirL	PA0514	nirL	heme d1 biosynthesis protein NirL
PALES_05121	35.25803006	-1.262285125	0.36282792	-3.47901872	5.03E-04	0.001345572	1.262285125	-2.398753855	PALES_05121	putative transcriptional regulator	PA0515	PA0515	probable transcriptional regulator
PALES_05131	142.0144811	-1.378300431	0.267101794	-5.160206569	2.47E-07	1.15E-06	1.378300431	-2.599619421	nirF	heme d1 biosynthesis protein NirF	PA0516	nirF	heme d1 biosynthesis protein NirF
PALES_05141	24.59720065	-1.100661502	0.391934369	-2.808280136	0.004980688	0.010760187	1.100661502	-2.144530006	nirC	putative c-type cytochrome precursor	PA0517	nirC	probable c-type cytochrome precursor
PALES_05151	96.26614919	-1.384275718	0.359145542	-3.854358628	1.16E-04	3.51E-04	1.384275718	-2.610408731	nirM	cytochrome c-551 precursor	PA0518	nirM	cytochrome c-551 precursor
PALES_05161	1615.344886	-2.226007085	0.27809174	-8.004578212	1.20E-15	1.36E-14	2.226007085	-4.678373632	nirS	nitrite reductase precursor	PA0519	nirS	nitrite reductase precursor
PALES_05181	11.35014842	2.022722753	0.612710514	3.301269861	9.62E-04	0.002425334	2.022722753	4.063499601	PALES_05181	putative cytochrome c oxidase subunit	PA0521	PA0521	probable cytochrome c oxidase subunit
PALES_05221	167.9632688	1.695061501	0.314473345	5.390159542	7.04E-08	3.54E-07	1.695061501	3.237906892	PALES_05221	putative dinitrification protein NorD	PA0525	PA0525	probable dinitrification protein NorD
PALES_05231	13.68634358	-1.897478037	0.519041132	-3.655737322	2.56E-04	7.29E-04	1.897478037	-3.725613557	PALES_05231	hypothetical protein	PA0526	PA0526	hypothetical protein
PALES_05241	88.72956928	-3.011662235	0.303889742	-9.910378065	3.75E-23	8.70E-22	3.011662235	-8.064931249	dnr	transcriptional regulator Dnr	PA0527	dnr	transcriptional regulator Dnr
PALES_05251	70.65354816	2.77966269	0.36128185	7.693889653	1.43E-14	1.49E-13	2.77966269	6.86691778	PALES_05251	putative transcriptional regulator	PA0528	PA0528	probable transcriptional regulator
PALES_05261	22.80684362	1.727905983	0.44884992	3.849629703	1.18E-04	3.57E-04	1.727905983	3.312466773	PALES_05261	putative sulfurase	PA0529	PA0529	conserved hypothetical protein
PALES_05271	17.5511647	1.411395312	0.484343352	2.914038785	0.003567856	0.007968602	1.411395312	2.659942965	PALES_05271	putative class III pyridoxal phosphate-dependent aminotransferase	PA0530	PA0530	probable class III pyridoxal phosphate-dependent aminotransferase
PALES_05321	241.3191498	-0.631637347	0.256128158	-2.466098814	0.013659365	0.026575401	0.631637347	-1.549322356	PALES_05321	putative oxidoreductase	PA0534	pauB1	FAD-dependent oxidoreductase
PALES_05341	188.4393455	-0.935661893	0.223229653	-4.191476711	2.77E-05	9.43E-05	0.935661893	-1.912767992	PALES_05341	putative dehydrogenase	PA0536	PA0536	hypothetical protein
PALES_05351	168.9388468	-0.750065254	0.221121045	-3.392102526	6.94E-04	0.001806131	0.750065254	-1.681868901	PALES_05351	hypothetical protein	PA0537	PA0537	conserved hypothetical protein
PALES_05391	90.44640178	-1.92773058	0.26465129	-7.284039982	3.24E-13	2.94E-12	1.92773058	-3.804562546	PALES_05391	putative cytochrome c'	PA0541	PA0541	hypothetical protein
PALES_05401	36.11873007	-1.424770556	0.344794219	-4.13223447	3.59E-05	1.20E-04	1.424770556	-2.684717998	PALES_05401	hypothetical protein	PA0542	PA0542	conserved hypothetical protein
PALES_05411	60.28603135	1.130491239	0.30320932	3.728418508	1.93E-04	5.61E-04	1.130491239	2.189332746	PALES_05411	putative depolymerase	PA0543	PA0543	hypothetical protein
PALES_05451	554.0822249	1.381489162	0.265525552	5.202848289	1.96E-07	9.29E-07	1.381489162	2.60537161	PALES_05451	putative transcriptional regulator	PA0547	PA0547	probable transcriptional regulator
PALES_05461	795.4707099	-0.932871038	0.200051319	-4.663158656	3.11E-06	1.24E-05	0.932871038	-1.909071369	tktA	transketolase	PA0548	tktA	transketolase
PALES_05481	14.29539088	-1.611575557	0.497674881	-3.238209558	0.001202824	0.002969589	1.611575557	-3.055853872	PALES_05481	putative hydroxypyruvate isomerase	PA0550	PA0550	conserved hypothetical protein
PALES_05491	144.9785158	-1.115290199	0.2299505	-4.850131661	1.23E-06	5.18E-06	1.115290199	-2.166385816	epd	D-erythrose 4-phosphate dehydrogenase	PA0551	epd	D-erythrose 4-phosphate dehydrogenase
PALES_05501	187.5130141	-1.222155012	0.22742658	-5.373844224	7.71E-08	3.85E-07	1.222155012	-2.332949392	pgk	phosphoglycerate kinase	PA0552	pgk	phosphoglycerate kinase
PALES_05531	745.3674349	-0.587407901	0.222827564	-2.636154565	0.008385153	0.017046345	0.587407901	-1.502544689	fda	fructose-1,6-bisphosphate aldolase	PA0555	fda	fructose-1,6-bisphosphate aldolase
PALES_05541	13.88732405	-1.326037874	0.495093412	-2.678358953	0.007398388	0.015262185	1.326037874	-2.507131858	PALES_05541	hypothetical protein	PA0556	PA0556	hypothetical protein
PALES_05551	28.23340051	0.927090818	0.374243823	2.477237461	0.013240378	0.025876694	0.927090818	1.901437894	PALES_05551	putative isomerase	PA0557	PA0557	hypothetical protein
PALES_05561	66.95999474	0.965818839	0.295595991	3.267361091	0.001085551	0.002708183	0.965818839	1.95317178	PALES_05561	hypothetical protein	PA0558	PA0558	conserved hypothetical protein
PALES_05571	40.01350256	-1.714874337	0.330073559	-5.195430807	2.04E-07	9.63E-07	1.714874337	-3.282680492	PALES_05571	putative periplasmic protein	PA0559	PA0559	conserved hypothetical protein
PALES_05691	296.6190576	-2.865218285	0.255473869	-11.21530861	3.43E-29	1.35E-27	2.865218285	-7.286461055	PALES_05691	hypothetical protein	PA0572	PA0572	hypothetical protein
PALES_05721	366.2756808	1.658739652	0.233562876	7.101897694	1.23E-12	1.05E-11	1.658739652	3.157405712	PALES_05721	hypothetical protein	PA0575	PA0575	conserved hypothetical protein
PALES_05751	143.0380063	-1.957858048	0.243288147	-8.047486369	8.45E-16	9.80E-15	1.957858048	-3.884847719	PALES_05751	hypothetical protein	PA0578	PA0578	conserved hypothetical protein
PALES_05761	453.787484	-2.24739389	0.278935543	-8.057036632	7.82E-16	9.15E-15	2.24739389	-4.748243398	rpsU	30S ribosomal protein S21	PA0579	rpsU	30S ribosomal protein S21
PALES_05781	30.65127235	1.773617706	0.405952431	4.369028412	1.25E-05	4.47E-05	1.773617706	3.419102577	PALES_05781	putative glycerol-3-phosphate acyltransferase PlsY	PA0581	PA0581	conserved hypothetical protein
PALES_05811	97.63098166	1.128904488	0.261166948	4.322539651	1.54E-05	5.44E-05	1.128904488	2.186926128	cca	multifunctional tRNA nucleotidyl transferase/2'3'-cyclic phosphodiesterase/2'nucleotidase/phosphatase	PA0584	cca	tRNA nucleotidyl transferase
PALES_05821	86.44881857	2.040752656	0.291821643	6.993150461	2.69E-12	2.21E-11	2.040752656	4.114601339	PALES_05821	hypothetical protein	PA0585	PA0585	hypothetical protein
PALES_05831	1836.814181	1.165627056	0.192353931	6.059803676	1.36E-09	8.54E-09	1.165627056	2.243306979	PALES_05831	SpoVR family protein	PA0586	PA0586	conserved hypothetical protein
PALES_05841	2404.894219	1.037125843	0.192659165	5.3832157	7.32E-08	3.67E-07	1.037125843	2.052135286	PALES_05841	hypothetical protein	PA0587	PA0587	conserved hypothetical protein
PALES_05851	10689.47062	0.716465702	0.20173908	3.551447256	3.83E-04	0.001048779	0.716465702	1.643151725	PALES_05851	putative protein kinase	PA0588	PA0588	conserved hypothetical protein
PALES_05901	105.7815725	-0.937938668	0.257031178	-3.649124104	2.63E-04	7.46E-04	0.937938668	-1.915788991	pdxA	4-hydroxythreonine-4-phosphate dehydrogenase	PA0593	pdxA	pyridoxal phosphate biosynthetic protein PdxA
PALES_05911	315.1735525	-0.929397044	0.222208401	-4.182546828	2.88E-05	9.78E-05	0.929397044	-1.904479877	surA	peptidyl-prolyl cis-trans isomerase SurA	PA0594	surA	peptidyl-prolyl cis-trans isomerase SurA
PALES_05921	1222.619111	-1.041405606	0.205040856	-5.079015108	3.79E-07	1.71E-06	1.041405606	-2.058231996	ostA	organic solvent tolerance protein OstA precursor	PA0595	lptD	LPS-assembly protein LptD
PALES_05981	40.70458856	0.780390048	0.337526854	2.312082846	0.020773118	0.038614612	0.780390048	1.717595181	PALES_05981	putative two-component response regulator	PA0601	agtR	two-component response regulator, AgtR
PALES_06041	68.62572812	-1.304941246	0.277465446	-4.703076589	2.56E-06	1.03E-05	1.304941246	-2.47073665	rpe	ribulose-phosphate 3-epimerase	PA0607	rpe	ribulose-phosphate 3-epimerase
PALES_06051	40.04808682	-1.426234662	0.326605772	-4.366838512	1.26E-05	4.50E-05	1.426234662	-2.687443942	PALES_06051	phosphoglycolate phosphatase	PA0608	PA0608	probable phosphoglycolate phosphatase
PALES_06111	99.75891984	1.681476864	0.332350337	5.059350554	4.21E-07	1.88E-06	1.681476864	3.207561359	PALES_06111	putative holin	PA0614	PA0614	hypothetical protein
PALES_06121	43.93853477	2.173478266	0.382566931	5.681301981	1.34E-08	7.45E-08	2.173478266	4.511096868	PALES_06121	hypothetical protein	PA0615	PA0615	hypothetical protein
PALES_06131	173.2537282	1.540868492	0.263591544	5.845667385	5.05E-09	2.96E-08	1.540868492	2.909696124	PALES_06131	putative baseplate assembly protein V	PA0616	PA0616	hypothetical protein
PALES_06141	49.90309389	1.173288582	0.328488453	3.571780293	3.55E-04	9.82E-04	1.173288582	2.255251897	PALES_06141	putative bacteriophage protein	PA0617	PA0617	probable bacteriophage protein
PALES_06151	72.04908005	1.590400546	0.313690425	5.069968409	3.98E-07	1.78E-06	1.590400546	3.011329436	PALES_06151	putative bacteriophage protein	PA0618	PA0618	probable bacteriophage protein
PALES_06161	78.43974365	0.915022868	0.281888268	3.246048071	0.001170191	0.002902586	0.915022868	1.88559896	PALES_06161	putative bacteriophage protein	PA0619	PA0619	probable bacteriophage protein
PALES_06171	188.5255258	1.080468881	0.237754224	4.544478174	5.51E-06	2.09E-05	1.080468881	2.114723261	PALES_06171	putative bacteriophage protein	PA0620	PA0620	probable bacteriophage protein
PALES_06201	71.04695083	0.626428391	0.271304548	2.308949098	0.020946406	0.038860773	0.626428391	1.543738502	PALES_06201	hypothetical protein	PA0624	PA0624	hypothetical protein
PALES_06211	200.1674796	1.190744641	0.247063351	4.819592374	1.44E-06	6.00E-06	1.190744641	2.282705336	PALES_06211	putative tail length determinator protein	PA0625	PA0625	hypothetical protein
PALES_06221	70.3268533	0.902962465	0.293637138	3.07509626	0.002104346	0.004924294	0.902962465	1.869901745	PALES_06221	putative tail formation protein	PA0626	PA0626	hypothetical protein
PALES_06231	15.18660652	1.421126292	0.510027078	2.786374204	0.00533013	0.011406287	1.421126292	2.677944929	PALES_06231	putative phage protein X	PA0627	PA0627	conserved hypothetical protein
PALES_06241	74.30912465	1.717176739	0.303408415	5.659621335	1.52E-08	8.41E-08	1.717176739	3.287923515	PALES_06241	putative phage late control gene D protein	PA0628	PA0628	conserved hypothetical protein
PALES_06251	25.73944416	1.4395531	0.448707711	3.208220108	0.001335592	0.003260134	1.4395531	2.712368322	PALES_06251	putative lytic enzyme	PA0629	PA0629	conserved hypothetical protein
PALES_06261	28.9257419	2.035951719	0.433549813	4.696004143	2.65E-06	1.06E-05	2.035951719	4.100931707	PALES_06261	hypothetical protein	PA0630	PA0630	hypothetical protein
PALES_06271	6.544793581	2.266512252	0.834721357	2.715292034	0.006621735	0.013876752	2.266512252	4.811585124	PALES_06271	hypothetical protein	PA0631	PA0631	hypothetical protein
PALES_15871	991.7401822	1.197773166	0.29454302	4.066547445	4.77E-05	1.55E-04	1.197773166	2.293853359	PALES_15871	hypothetical protein	PA0636	PA0636	hypothetical protein
PALES_06291	528.8244698	0.729844298	0.207871719	3.511032198	4.46E-04	0.001211467	0.729844298	1.658460093	trpD	anthranilate phosphoribosyltransferase	PA0650	trpD	anthranilate phosphoribosyltransferase
PALES_06301	176.5244284	0.871404268	0.229283761	3.800549428	1.44E-04	4.28E-04	0.871404268	1.829442748	trpC	indole-3-glycerol-phosphate synthase	PA0651	trpC	indole-3-glycerol-phosphate synthase
PALES_06321	106.8345071	-0.959603728	0.245919942	-3.902098066	9.54E-05	2.94E-04	0.959603728	-1.944775641	PALES_06321	putative redox protein	PA0653	PA0653	conserved hypothetical protein
PALES_06331	328.5324953	-1.56573785	0.246007959	-6.364582102	1.96E-10	1.33E-09	1.56573785	-2.960288637	speD	S-adenosylmethionine decarboxylase	PA0654	speD	S-adenosylmethionine decarboxylase proenzyme
PALES_06351	86.67861823	0.928499744	0.280405282	3.311277653	9.29E-04	0.002351447	0.928499744	1.903295733	PALES_06351	putative HIT family protein	PA0656	PA0656	probable HIT family protein
PALES_06371	4519.315944	-0.802304194	0.270034632	-2.971115921	0.002967198	0.006747501	0.802304194	-1.74388414	PALES_06371	putative short-chain dehydrogenase	PA0658	PA0658	probable short-chain dehydrogenase
PALES_06381	365.8628093	-1.592015232	0.217900752	-7.306148399	2.75E-13	2.52E-12	1.592015232	-3.014701649	PALES_06381	hypothetical protein	PA0659	PA0659	hypothetical protein
PALES_06391	151.7876368	-0.782189362	0.251698564	-3.10764332	0.001885855	0.004463535	0.782189362	-1.719738684	PALES_06391	putative 2-nitropropane dioxygenase	PA0660	PA0660	hypothetical protein
PALES_06411	107.423162	-0.633914734	0.260717364	-2.431425061	0.015039559	0.028940957	0.633914734	-1.551769993	argC	N-acetyl-gamma-glutamyl-phosphate reductase	PA0662	argC	N-acetyl-gamma-glutamyl-phosphate reductase
PALES_06431	78.24252001	-1.090858061	0.276577544	-3.94413099	8.01E-05	2.51E-04	1.090858061	-2.130006836	PALES_06431	putative integral membrane protein	PA0664	PA0664	hypothetical protein
PALES_46601	53.62253191	1.19756326	0.316676203	3.781664831	1.56E-04	4.59E-04	1.19756326	2.293519638	dnaE2	error-prone DNA polymerase	PA0669	PA0669	probable DNA polymerase alpha chain
PALES_46591	17.84641439	1.697130864	0.507035178	3.347165915	8.16E-04	0.002089393	1.697130864	3.242554591	PALES_46591	hypothetical protein	PA0670	PA0670	hypothetical protein
PALES_46581	32.88962989	2.54106339	0.421602159	6.027159338	1.67E-09	1.04E-08	2.54106339	5.82017846	PALES_46581	hypothetical protein	PA0671	PA0671	hypothetical protein
PALES_46571	312.1049327	1.883974015	0.231948713	8.122373225	4.57E-16	5.48E-15	1.883974015	3.690903491	hemO	heme oxygenase	PA0672	hemO	heme oxygenase
PALES_46551	13.23506844	2.173472137	0.622870816	3.489442886	4.84E-04	0.001301049	2.173472137	4.511077705	vreA	VreA	PA0674	vreA	VreA
PALES_46411	56.35632793	2.350020858	0.352242158	6.671605889	2.53E-11	1.91E-10	2.350020858	5.09831622	PALES_46411	hypothetical protein	PA0689	lapB	low-molecular-weight alkaline phosphatase B, LapB
PALES_46401	120.826565	1.238624236	0.252010098	4.91497859	8.88E-07	3.79E-06	1.238624236	2.359733991	PALES_46401	hypothetical protein	PA0690	pdtA	phosphate depletion regulated TPS partner A, PdtA
PALES_46271	22.94947389	1.204711953	0.413830588	2.911123507	0.003601316	0.008024489	1.204711953	2.30491245	PALES_46271	putative major facilitator superfamily (MFS) transporter	PA0703	PA0703	probable major facilitator superfamily (MFS) transporter
PALES_46261	144.563739	0.982176438	0.238947153	4.110433727	3.95E-05	1.30E-04	0.982176438	1.9754433	PALES_46261	amidase	PA0704	PA0704	probable amidase
PALES_46241	55.84877971	-0.786687708	0.2882879	-2.728826664	0.00635601	0.013409809	0.786687708	-1.725109224	cat	chloramphenicol acetyltransferase	PA0706	cat	chloramphenicol acetyltransferase
PALES_46171	52.26991137	-2.429134241	0.342720211	-7.087805635	1.36E-12	1.16E-11	2.429134241	-5.385701387	PALES_46171	hypothetical protein	PA0713	PA0713	hypothetical protein
PALES_46161	36.8045296	-1.437620638	0.344512492	-4.17291294	3.01E-05	1.02E-04	1.437620638	-2.708737589	PALES_46161	hypothetical protein	PA0714	PA0714	hypothetical protein
PALES_46151	2802.40616	3.457514647	0.319586604	10.81870954	2.81E-27	9.14E-26	3.457514647	10.98539353	PALES_46151	putative transferase	PA0730	PA0730	probable transferase
PALES_46141	50.76841868	0.984908681	0.303106156	3.249385273	0.001156547	0.00287324	0.984908681	1.979188031	PALES_46141	hypothetical protein	PA0731	PA0731	hypothetical protein
PALES_46131	250.7010094	0.801180878	0.220142237	3.639378289	2.73E-04	7.72E-04	0.801180878	1.74252684	PALES_46131	hypothetical protein	PA0732	PA0732	hypothetical protein
PALES_46071	93.72808294	1.416107122	0.296969979	4.768519446	1.86E-06	7.63E-06	1.416107122	2.668644482	PALES_46071	hypothetical protein	PA0737	PA0737	hypothetical protein
PALES_46061	23.94997641	1.581307886	0.426411159	3.708411126	2.09E-04	6.02E-04	1.581307886	2.99241006	PALES_46061	hypothetical protein	PA0738	PA0738	conserved hypothetical protein
PALES_46031	11.47048547	2.089241805	0.646868132	3.229780075	0.001238855	0.003048151	2.089241805	4.255243837	sdsA1	SDS hydrolase SdsA1	PA0740	sdsA1	SDS hydrolase SdsA1
PALES_46021	35.13459571	1.763050789	0.379303467	4.648127268	3.35E-06	1.32E-05	1.763050789	3.394151093	PALES_46021	hypothetical protein	PA0741	PA0741	conserved hypothetical protein
PALES_45991	140.6936942	-2.136012624	0.256558242	-8.325644124	8.39E-17	1.07E-15	2.136012624	-4.395455331	PALES_45991	putative enoyl-CoA hydratase/isomerase	PA0744	PA0744	probable enoyl-CoA hydratase/isomerase
PALES_45981	233.5077633	-2.05439273	0.250596669	-8.198004938	2.44E-16	3.02E-15	2.05439273	-4.153687643	PALES_45981	enoyl-CoA hydratase	PA0745	dspI	DspI
PALES_45971	125.5534492	-1.961885506	0.251472847	-7.80157989	6.11E-15	6.68E-14	1.961885506	-3.895707894	PALES_45971	putative acyl-CoA dehydrogenase	PA0746	PA0746	probable acyl-CoA dehydrogenase
PALES_45961	246.1791323	-1.315184286	0.209650701	-6.273216742	3.54E-10	2.33E-09	1.315184286	-2.48834114	PALES_45961	putative aldehyde dehydrogenase	PA0747	PA0747	probable aldehyde dehydrogenase
PALES_45931	169.1757903	-1.804933737	0.256497429	-7.036849238	1.97E-12	1.64E-11	1.804933737	-3.494131095	ung	uracil-DNA glycosylase	PA0750	ung	uracil-DNA glycosylase
PALES_45861	17.81089065	-1.030478278	0.465311719	-2.214597733	0.026787688	0.048321493	1.030478278	-2.04270133	PALES_45861	putative two-component sensor	PA0757	PA0757	probable two-component sensor
PALES_45811	1115.978623	0.733657981	0.209372243	3.504084256	4.58E-04	0.001239276	0.733657981	1.662849939	algU	RNA polymerase sigma factor AlgU	PA0762	algU	sigma factor AlgU
PALES_45761	566.2504578	-1.229751468	0.218959797	-5.616334541	1.95E-08	1.07E-07	1.229751468	-2.345265847	lepA	GTP-binding protein LepA	PA0767	lepA	GTP-binding protein LepA
PALES_45741	173.6132025	1.090201799	0.240589554	4.531376286	5.86E-06	2.20E-05	1.090201799	2.129038146	PALES_45741	hypothetical protein	PA0769	PA0769	hypothetical protein
PALES_45731	304.0215833	0.638439572	0.236230755	2.702609876	0.006879744	0.014341597	0.638439572	1.556644572	rnc	ribonuclease III	PA0770	rnc	ribonuclease III
PALES_45691	15.84607004	-2.225264221	0.502610121	-4.427416258	9.54E-06	3.46E-05	2.225264221	-4.675965291	PALES_45691	hypothetical protein	PA0774	PA0774	conserved hypothetical protein
PALES_45681	66.13597369	-1.455479301	0.299569474	-4.858570138	1.18E-06	4.98E-06	1.455479301	-2.74247658	PALES_45681	hypothetical protein	PA0775	PA0775	conserved hypothetical protein
PALES_45671	46.29043212	1.337036342	0.330626925	4.043942707	5.26E-05	1.70E-04	1.337036342	2.526318162	PALES_45671	hypothetical protein	PA0776	PA0776	hypothetical protein
PALES_45651	80.87176792	2.164395397	0.324381651	6.672373089	2.52E-11	1.90E-10	2.164395397	4.482785277	icp	inhibitor of cysteine peptidase	PA0778	icp	inhibitor of cysteine peptidase
PALES_45641	2611.508121	3.174009957	0.219151836	14.48315478	1.55E-47	2.45E-45	3.174009957	9.025519393	PALES_45641	putative ATP-dependent protease	PA0779	asrA	AsrA
PALES_45621	10.62505343	2.122884013	0.64804539	3.275826118	0.001053534	0.002636608	2.122884013	4.355637872	PALES_45621	hypothetical protein	PA0781	PA0781	hypothetical protein
PALES_45591	288.1814394	1.046635139	0.221925658	4.716152017	2.40E-06	9.72E-06	1.046635139	2.065706287	PALES_45591	putative transcriptional regulator	PA0784	PA0784	probable transcriptional regulator
PALES_45561	17.21572974	-1.013003775	0.444911264	-2.276867	0.022794169	0.041847982	1.013003775	-2.018108548	PALES_45561	putative ATPase	PA0787	PA0787	hypothetical protein
PALES_45551	227.3546407	1.578092155	0.231716219	6.810451851	9.73E-12	7.57E-11	1.578092155	2.985747481	PALES_45551	hypothetical protein	PA0788	PA0788	hypothetical protein
PALES_45531	128.0505017	-2.001629263	0.244939614	-8.171929527	3.03E-16	3.71E-15	2.001629263	-4.004519828	PALES_45531	putative amino acid permease	PA0789	PA0789	probable amino acid permease
PALES_45511	24.77575258	1.629134358	0.430598299	3.783420328	1.55E-04	4.56E-04	1.629134358	3.093273414	PALES_45511	putative transcriptional regulator	PA0791	PA0791	probable transcriptional regulator
PALES_45501	112.4609037	-1.442334344	0.265878708	-5.42478319	5.80E-08	2.97E-07	1.442334344	-2.7176023	prpD	2-methylcitrate dehydratase	PA0792	prpD	propionate catabolic protein PrpD
PALES_45491	68.71915689	-2.129486895	0.301140053	-7.071417011	1.53E-12	1.30E-11	2.129486895	-4.375618307	PALES_45491	hypothetical protein	PA0793	PA0793	hypothetical protein
PALES_45481	113.2004989	-2.440188512	0.266321159	-9.162578457	5.07E-20	8.70E-19	2.440188512	-5.427126409	PALES_45481	aconitate hydratase	PA0794	PA0794	probable aconitate hydratase
PALES_45471	240.5480835	-2.629796953	0.269293992	-9.765524051	1.58E-22	3.45E-21	2.629796953	-6.189388809	prpC	methylcitrate synthase	PA0795	prpC	citrate synthase 2
PALES_45461	194.1524558	-2.185364515	0.280167603	-7.800204194	6.18E-15	6.74E-14	2.185364515	-4.548416963	prpB	2-methylisocitrate lyase	PA0796	prpB	carboxyphosphonoenolpyruvate phosphonomutase
PALES_45451	30.39723497	-1.826624378	0.36939495	-4.944908909	7.62E-07	3.28E-06	1.826624378	-3.547061583	PALES_45451	putative transcriptional regulator	PA0797	PA0797	probable transcriptional regulator
PALES_45411	26.62309836	0.866110519	0.390630344	2.217212598	0.026608567	0.0480896	0.866110519	1.822742189	PALES_45411	hypothetical protein	PA0801	PA0801	hypothetical protein
PALES_45371	1169.250873	1.15687273	0.226749876	5.101977338	3.36E-07	1.53E-06	1.15687273	2.229735729	PALES_45371	hypothetical protein	PA0805	PA0805	hypothetical protein
PALES_45351	165.7811319	1.34948354	0.253861578	5.315824279	1.06E-07	5.22E-07	1.34948354	2.548208877	ampDh3	AmpDh3	PA0807	ampDh3	AmpDh3
PALES_45341	27.43632837	1.569166424	0.399314312	3.929652343	8.51E-05	2.65E-04	1.569166424	2.967332148	PALES_45341	hypothetical protein	PA0808	PA0808	hypothetical protein
PALES_45321	49.17646464	1.490997692	0.361142887	4.128553396	3.65E-05	1.21E-04	1.490997692	2.810832904	PALES_45321	putative haloacid dehalogenase	PA0810	PA0810	probable haloacid dehalogenase
PALES_45301	19.16350591	2.062285003	0.530060599	3.890658932	1.00E-04	3.07E-04	2.062285003	4.176472687	PALES_45301	hypothetical protein	PA0812	PA0812	hypothetical protein
PALES_45291	13.67276079	1.169822046	0.511680773	2.286234128	0.022240565	0.040926427	1.169822046	2.249839439	PALES_45291	hypothetical protein	PA0813	PA0813	hypothetical protein
PALES_45251	17.26019506	1.215680091	0.493658667	2.462592421	0.013793662	0.026803785	1.215680091	2.322502406	PALES_45251	putative ring-cleaving dioxygenase	PA0817	PA0817	probable ring-cleaving dioxygenase
PALES_45211	62.26573539	0.667156399	0.283921076	2.349795262	0.01878374	0.035289088	0.667156399	1.587939997	PALES_45211	hypothetical protein	PA0821	PA0821	hypothetical protein
PALES_45181	13.54404359	2.880831405	0.679130365	4.241941686	2.22E-05	7.64E-05	2.880831405	7.36574476	PALES_45181	hypothetical protein	PA0825	PA0825	hypothetical protein
PALES_45171	328.4472305	1.873476383	0.245973834	7.616567808	2.61E-14	2.64E-13	1.873476383	3.66414446	PALES_45171	hypothetical protein	PA0826	PA0826	hypothetical protein
PALES_45171	328.4472305	1.873476383	0.245973834	7.616567808	2.61E-14	2.64E-13	1.873476383	3.66414446	PALES_45171	hypothetical protein	PA0826	PA0826	translated portion of tmRNA gene ssrA
PALES_44851	811.5726251	0.93420016	0.193427547	4.829716222	1.37E-06	5.72E-06	0.93420016	1.910830964	PALES_44851	hypothetical protein	PA0833	PA0833	hypothetical protein
PALES_44841	55.43134293	-1.071812208	0.287387091	-3.729507146	1.92E-04	5.59E-04	1.071812208	-2.102072179	PALES_44841	putative acyltransferase	PA0834	PA0834	conserved hypothetical protein
PALES_44831	390.7836535	-1.5567791	0.201599368	-7.722142774	1.14E-14	1.21E-13	1.5567791	-2.941962995	pta	phosphate acetyltransferase	PA0835	pta	phosphate acetyltransferase
PALES_44821	313.4428796	-1.907765989	0.259735887	-7.345022716	2.06E-13	1.93E-12	1.907765989	-3.752276103	ackA	acetate kinase	PA0836	ackA	acetate kinase
PALES_44801	204.6532209	0.855283588	0.244020173	3.504970821	4.57E-04	0.001236324	0.855283588	1.809114334	PALES_44801	putative glutathione peroxidase	PA0838	PA0838	probable glutathione peroxidase
PALES_44791	28.36103365	1.737860248	0.408518543	4.254054749	2.10E-05	7.25E-05	1.737860248	3.335401064	PALES_44791	putative transcriptional regulator	PA0839	PA0839	probable transcriptional regulator
PALES_44781	29.03011098	1.379237986	0.383178746	3.599463698	3.19E-04	8.92E-04	1.379237986	2.601309367	PALES_44781	putative oxidoreductase	PA0840	PA0840	probable oxidoreductase
PALES_44741	8.490600751	1.588223769	0.659899073	2.406767693	0.016094404	0.030611556	1.588223769	3.006789288	plcH	hemolytic phospholipase C precursor	PA0844	plcH	hemolytic phospholipase C precursor
PALES_44711	97.00083005	1.271758798	0.273824661	4.644427549	3.41E-06	1.34E-05	1.271758798	2.414557463	PALES_44711	hypothetical protein	PA0847	PA0847	diguanylate cyclase
PALES_44691	148.6907131	1.335756953	0.298580491	4.473691332	7.69E-06	2.84E-05	1.335756953	2.524078803	trxB2	thioredoxin reductase 2	PA0849	trxB2	thioredoxin reductase 2
PALES_44671	168.2988853	1.228396546	0.228318149	5.380196669	7.44E-08	3.72E-07	1.228396546	2.3430643	PALES_44671	hypothetical protein	PA0851	PA0851	hypothetical protein
PALES_44661	2396.736926	-3.596542658	0.225425673	-15.95445014	2.65E-57	6.64E-55	3.596542658	-12.09670865	cbpD	chitin-binding protein CbpD precursor	PA0852	cbpD	chitin-binding protein CbpD precursor
PALES_44661	2396.736926	-3.596542658	0.225425673	-15.95445014	2.65E-57	6.64E-55	3.596542658	-12.09670865	cbpD	chitin-binding protein CbpD precursor	PA0852	PA0852	Uncharacterized protein
PALES_44591	68.09991727	1.193903093	0.35243362	3.387597058	7.05E-04	0.00183405	1.193903093	2.287708274	PALES_44591	hypothetical protein	PA0859	PA0859	hypothetical protein
PALES_44581	63.1972449	0.872801046	0.292867128	2.980194645	0.002880653	0.006575854	0.872801046	1.831214822	PALES_44581	putative ATP-binding/permease fusion ABC transporter	PA0860	PA0860	probable ATP-binding/permease fusion ABC transporter
PALES_44571	780.7703856	1.687918502	0.189965722	8.88538459	6.37E-19	1.00E-17	1.687918502	3.221915153	PALES_44571	hypothetical protein	PA0861	rbdA	RbDA
PALES_44561	373.2966955	1.092763673	0.209411611	5.218257317	1.81E-07	8.57E-07	1.092763673	2.132822157	PALES_44561	hypothetical protein	PA0862	PA0862	hypothetical protein
PALES_44511	2170.818754	-0.938831775	0.224614807	-4.179741252	2.92E-05	9.88E-05	0.938831775	-1.916975336	hpd	4-hydroxyphenylpyruvate dioxygenase	PA0865	hpd	4-hydroxyphenylpyruvate dioxygenase
PALES_44491	79.93792559	-1.344473494	0.273301463	-4.919379068	8.68E-07	3.72E-06	1.344473494	-2.539375062	PALES_44491	lysozyme inhibitor	PA0867	mliC	membrane-bound lysozyme inhibitor of c-type lysozyme MliC
PALES_44471	193.6241321	0.711316437	0.220777477	3.221870478	0.001273567	0.003124773	0.711316437	1.637297444	pbpG	D-alanyl-D-alanine endopeptidase	PA0869	pbpG	D-alanyl-D-alanine-endopeptidase
PALES_44461	324.6299272	-1.157292245	0.225076437	-5.141774332	2.72E-07	1.26E-06	1.157292245	-2.230384198	phhC	aromatic amino acid aminotransferase	PA0870	phhC	aromatic amino acid aminotransferase
PALES_44451	246.4524944	-1.359569218	0.236579482	-5.74677569	9.10E-09	5.18E-08	1.359569218	-2.566085459	phhB	pterin-4-alpha-carbinolamine dehydratase	PA0871	phhB	pterin-4-alpha-carbinolamine dehydratase
PALES_44441	1060.120839	-0.826246244	0.200178008	-4.127557531	3.67E-05	1.22E-04	0.826246244	-1.773066005	phhA	phenylalanine 4-monooxygenase	PA0872	phhA	phenylalanine-4-hydroxylase
PALES_44431	96.25078068	1.119200654	0.258166704	4.3351859	1.46E-05	5.16E-05	1.119200654	2.172265816	phhR	transcriptional regulator PhhR	PA0873	phhR	transcriptional regulator PhhR
PALES_44411	18.47300103	1.939255483	0.501429297	3.867455482	1.10E-04	3.35E-04	1.939255483	3.835076837	PALES_44411	hypothetical protein	PA0875	PA0875	conserved hypothetical protein
PALES_44391	12.97636111	1.538386163	0.543266031	2.831736343	0.004629601	0.010088795	1.538386163	2.904693949	PALES_44391	putative transcriptional regulator	PA0877	PA0877	probable transcriptional regulator
PALES_44371	10.86794259	1.686528705	0.610127889	2.764221624	0.005705877	0.012139349	1.686528705	3.218812868	PALES_44371	putative acyl-CoA dehydrogenase	PA0879	PA0879	probable acyl-CoA dehydrogenase
PALES_44291	373.6373925	-1.985912524	0.233317669	-8.511625091	1.72E-17	2.32E-16	1.985912524	-3.961131304	acsA	acetyl-CoA synthetase	PA0887	acsA	acetyl-coenzyme A synthetase
PALES_44281	1379.046485	-1.046373937	0.226052452	-4.628898862	3.68E-06	1.44E-05	1.046373937	-2.065332322	aotJ	arginine/ornithine binding protein AotJ	PA0888	aotJ	arginine/ornithine binding protein AotJ
PALES_44251	82.97821842	-0.622900401	0.255530652	-2.4376739	0.014782102	0.028491648	0.622900401	-1.539968031	PALES_44251	hypothetical protein	PA0891	PA0891	hypothetical protein
PALES_44231	149.7444042	0.637497858	0.237892179	2.67977645	0.007367134	0.015210909	0.637497858	1.555628809	argR	transcriptional regulator ArgR	PA0893	argR	transcriptional regulator ArgR
PALES_44191	113.2709955	0.638881438	0.276671503	2.309169648	0.020934169	0.03885323	0.638881438	1.557121411	aruG	arginine/ornithine succinyltransferase AII subunit	PA0897	aruG	subunit II of arginine N2-succinyltransferase = ornithine N2-succinyltransferase
PALES_44171	235.7906698	1.274230545	0.217694162	5.853306016	4.82E-09	2.83E-08	1.274230545	2.418697833	aruB	succinylarginine dihydrolase	PA0899	aruB	N2-Succinylarginine dihydrolase
PALES_44131	569.6439227	-1.266406803	0.192258485	-6.587000854	4.49E-11	3.28E-10	1.266406803	-2.405616724	alaS	alanyl-tRNA synthetase	PA0903	alaS	alanyl-tRNA synthetase
PALES_44121	341.3401678	-1.232149901	0.19879387	-6.198128239	5.71E-10	3.73E-09	1.232149901	-2.349168017	lysC	aspartate kinase	PA0904	lysC	aspartate kinase alpha and beta chain
PALES_44111	4706.111237	2.107423415	0.597909358	3.524653674	4.24E-04	0.001154147	2.107423415	4.309210024	rsmA	carbon storage regulator	PA0905	rsmA	RsmA
PALES_44101	90.10171315	1.118548649	0.28591934	3.912112581	9.15E-05	2.83E-04	1.118548649	2.171284314	PALES_44101	putative transcriptional regulator	PA0906	alpR	lysis phenotype repressor, AlpR
PALES_44091	44.10720612	0.922146446	0.329382676	2.799620358	0.005116274	0.011003113	0.922146446	1.894932484	PALES_44091	hypothetical protein	PA0907	alpA	lysis phenotype activator, AlpA
PALES_44081	14.54984653	2.275759893	0.589839277	3.858271198	1.14E-04	3.47E-04	2.275759893	4.842526331	PALES_44081	hypothetical protein	PA0908	alpB	AlpB
PALES_44051	44.24452027	0.966800979	0.320670744	3.014933531	0.002570356	0.005930151	0.966800979	1.954501889	PALES_44051	hypothetical protein	PA0911	alpE	AlpE
PALES_43991	221.1545504	1.382159056	0.251096163	5.504500909	3.70E-08	1.93E-07	1.382159056	2.606581656	kup	potassium uptake protein Kup	PA0917	kup	potassium uptake protein Kup
PALES_43981	178.4749282	-1.490254056	0.286303955	-5.205146599	1.94E-07	9.18E-07	1.490254056	-2.809384435	PALES_43981	cytochrome b561	PA0918	PA0918	cytochrome b561
PALES_43941	78.72106182	1.113522119	0.273141566	4.076721585	4.57E-05	1.49E-04	1.113522119	2.163732451	PALES_43941	hypothetical protein	PA0922	PA0922	hypothetical protein
PALES_43931	52.32919747	1.130956308	0.306698359	3.687519915	2.26E-04	6.48E-04	1.130956308	2.190038616	dinB	DNA polymerase IV	PA0923	dinB	DNA Polymerase IV, DinB
PALES_43911	58.10138547	-1.158943689	0.302438124	-3.832002632	1.27E-04	3.81E-04	1.158943689	-2.232938766	PALES_43911	hypothetical protein	PA0925	PA0925	hypothetical protein
PALES_43901	42.9624094	-0.90413734	0.326384072	-2.770163794	0.005602811	0.011936096	0.90413734	-1.871425141	PALES_43901	hypothetical protein	PA0926	PA0926	hypothetical protein
PALES_43871	65.41128734	2.29662353	0.319798851	7.181462727	6.90E-13	6.03E-12	2.29662353	4.913065695	PALES_43871	two-component response regulator	PA0929	PA0929	two-component response regulator
PALES_43851	80.94081185	1.164895773	0.281956006	4.131480612	3.60E-05	1.20E-04	1.164895773	2.242170165	pirA	outer membrane receptor FepA	PA0931	pirA	ferric enterobactin receptor PirA
PALES_43781	813.5315919	-0.92437806	0.243384898	-3.798009114	1.46E-04	4.32E-04	0.92437806	-1.897865904	PALES_43781	hypothetical protein	PA0938	wzz2	Wzz2
PALES_43711	89.18425666	-1.072326824	0.305819236	-3.506407371	4.54E-04	0.00123131	1.072326824	-2.102822132	purN	phosphoribosylglycinamide formyltransferase	PA0944	purN	phosphoribosylaminoimidazole synthetase
PALES_43701	217.874184	-1.24393547	0.232547994	-5.349155878	8.84E-08	4.40E-07	1.24393547	-2.368437283	purM	phosphoribosylaminoimidazole synthetase	PA0945	purM	phosphoribosylaminoimidazole synthetase
PALES_43681	49.94499618	-2.199261159	0.359665437	-6.114741466	9.67E-10	6.18E-09	2.199261159	-4.592440911	PALES_43681	DNA replication initiation factor	PA0947	PA0947	conserved hypothetical protein
PALES_43671	17.57149615	-1.184287642	0.439397729	-2.695252074	0.00703354	0.014617344	1.184287642	-2.272511573	PALES_43671	hypothetical protein	PA0948	PA0948	hypothetical protein
PALES_43621	27.12575418	-3.393109637	0.46623637	-7.277659699	3.40E-13	3.06E-12	3.393109637	-10.50576736	PALES_43621	hypothetical protein	PA0952	PA0952	hypothetical protein
PALES_43611	48.58490726	0.827954051	0.304969853	2.714871791	0.006630143	0.013888252	0.827954051	1.775166135	PALES_43611	putative thioredoxin	PA0953	PA0953	probable thioredoxin
PALES_43591	119.9174888	-1.884500425	0.245366218	-7.680358107	1.59E-14	1.64E-13	1.884500425	-3.692250474	PALES_43591	hypothetical protein	PA0955	PA0955	hypothetical protein
PALES_43581	758.150803	-1.074726966	0.215284348	-4.992127744	5.97E-07	2.61E-06	1.074726966	-2.106323407	proS	prolyl-tRNA synthetase	PA0956	proS	prolyl-tRNA synthetase
PALES_43551	170.7347743	1.165492565	0.263157708	4.428874898	9.47E-06	3.44E-05	1.165492565	2.243097864	PALES_43551	hypothetical protein	PA0959	PA0959	hypothetical protein
PALES_43541	73.33878263	1.341781519	0.308514681	4.349165858	1.37E-05	4.86E-05	1.341781519	2.53464117	PALES_43541	hypothetical protein	PA0960	PA0960	hypothetical protein
PALES_43531	19.07274815	-1.362295396	0.455325719	-2.991914004	0.002772343	0.006349949	1.362295396	-2.570939028	PALES_43531	putative cold-shock protein	PA0961	PA0961	probable cold-shock protein
PALES_43521	1519.609184	-1.719164481	0.214643193	-8.009406	1.15E-15	1.31E-14	1.719164481	-3.292456732	PALES_43521	putative dna-binding stress protein	PA0962	dps	DNA-binding protein from starved cells, Dps
PALES_43511	707.264475	-1.792762664	0.20461463	-8.761654339	1.92E-18	2.90E-17	1.792762664	-3.464777393	aspS	aspartyl-tRNA synthetase	PA0963	aspS	aspartyl-tRNA synthetase
PALES_43501	615.40383	-1.902772868	0.205742547	-9.248319772	2.28E-20	4.09E-19	1.902772868	-3.739312042	PALES_43501	hypothetical protein	PA0964	pmpR	pqsR-mediated PQS regulator, PmpR
PALES_43451	306.8738285	-0.9094284	0.203551283	-4.467809712	7.90E-06	2.90E-05	0.9094284	-1.878301163	tolQ	TolQ protein	PA0969	tolQ	TolQ protein
PALES_43421	823.9881491	-1.058633073	0.224185673	-4.722126354	2.33E-06	9.46E-06	1.058633073	-2.082957023	tolB	translocation protein TolB	PA0972	tolB	TolB protein
PALES_43411	1084.777155	-1.692036342	0.180992813	-9.348638316	8.88E-21	1.64E-19	1.692036342	-3.231124503	oprL	Peptidoglycan associated lipoprotein OprL precursor	PA0973	oprL	Peptidoglycan associated lipoprotein OprL precursor
PALES_43401	298.7358091	-0.888263915	0.208722729	-4.255712436	2.08E-05	7.21E-05	0.888263915	-1.850947422	PALES_43401	hypothetical protein	PA0974	PA0974	conserved hypothetical protein
PALES_43391	48.09868761	-1.413418476	0.342931464	-4.121577116	3.76E-05	1.25E-04	1.413418476	-2.663675755	PALES_43391	putative radical activating enzyme	PA0975	PA0975	probable radical activating enzyme
PALES_23711	13.17276388	1.398885058	0.551389058	2.537019981	0.011180057	0.022159722	1.398885058	2.636977127	PALES_23711	insertion sequence IS407 OrfB	PA0987	PA0987	conserved hypothetical protein
PALES_43361	14.94952402	-1.178517125	0.512923624	-2.297646412	0.021581922	0.039884197	1.178517125	-2.263440096	PALES_43361	hypothetical protein	PA0989	PA0989	hypothetical protein
PALES_43351	66.67556365	1.120171887	0.294117159	3.808590741	1.40E-04	4.16E-04	1.120171887	2.173728695	PALES_43351	hypothetical protein	PA0990	PA0990	conserved hypothetical protein
PALES_43311	42.54418385	1.089727829	0.347248277	3.138180664	0.001700001	0.004062062	1.089727829	2.128338806	cupC3	usher CupC3	PA0994	cupC3	usher CupC3
PALES_43291	304.2821857	-0.657594804	0.228480702	-2.878119682	0.004000533	0.008835363	0.657594804	-1.577450576	pqsA	putative coenzyme A ligase	PA0996	pqsA	PqsA
PALES_43281	321.5615817	-1.819237615	0.233955559	-7.775996547	7.49E-15	8.05E-14	1.819237615	-3.528946639	pqsB	Homologous to beta-keto-acyl-acyl-carrier protein synthase	PA0997	pqsB	PqsB
PALES_43271	157.287048	-1.684531821	0.269639886	-6.247339157	4.18E-10	2.74E-09	1.684531821	-3.214360678	pqsC	Homologous to beta-keto-acyl-acyl-carrier protein synthase	PA0998	pqsC	PqsC
PALES_43261	210.7484085	-1.757000119	0.247038253	-7.112259331	1.14E-12	9.78E-12	1.757000119	-3.379945818	pqsD	3-oxoacyl-(acyl carrier protein) synthase III	PA0999	pqsD	3-oxoacyl-[acyl-carrier-protein] synthase III
PALES_43251	347.6094454	-1.567447875	0.233615233	-6.709527697	1.95E-11	1.49E-10	1.567447875	-2.963799545	pqsE	Quinolone signal response protein	PA1000	pqsE	Quinolone signal response protein
PALES_43241	205.7151795	-1.472385382	0.21392099	-6.882846722	5.87E-12	4.68E-11	1.472385382	-2.774803062	phnA	anthranilate synthase component I	PA1001	phnA	anthranilate synthase component I
PALES_43231	58.14594749	-1.62045047	0.33385076	-4.853816924	1.21E-06	5.09E-06	1.62045047	-3.074710267	phnB	anthranilate synthase component II	PA1002	phnB	anthranilate synthase component II
PALES_43181	15.76683362	-1.122736123	0.474549692	-2.365897906	0.017986404	0.033938631	1.122736123	-2.1775957	PALES_43181	hypothetical protein	PA1007	PA1007	conserved hypothetical protein
PALES_43171	280.6528617	-0.654014708	0.216555058	-3.020085126	0.002527036	0.005844386	0.654014708	-1.573540933	bcp	bacterioferritin comigratory protein	PA1008	bcp	bacterioferritin comigratory protein
PALES_43161	280.3487093	-0.801827646	0.261834387	-3.06234661	0.00219609	0.005126366	0.801827646	-1.7433082	PALES_43161	Putative glycine cleavage system transcriptional repressor	PA1009	PA1009	hypothetical protein
PALES_43151	641.4219942	-0.874309811	0.190038154	-4.600706728	4.21E-06	1.63E-05	0.874309811	-1.833130903	dapA	dihydrodipicolinate synthase	PA1010	dapA	dihydrodipicolinate synthase
PALES_43141	356.7872005	-1.187797553	0.20462683	-5.804700945	6.45E-09	3.71E-08	1.187797553	-2.278047064	PALES_43141	Putative lipoprotein	PA1011	PA1011	hypothetical protein
PALES_43111	110.1418369	-1.406754199	0.246164801	-5.714684613	1.10E-08	6.20E-08	1.406754199	-2.651399747	PALES_43111	putative glycosyl transferase	PA1014	wapB	1,2-glucosyltransferase WapB
PALES_43101	33.44725794	-1.135285365	0.347523949	-3.266783109	0.00108777	0.002712294	1.135285365	-2.196620076	PALES_43101	putative transcriptional regulator	PA1015	PA1015	probable transcriptional regulator
PALES_43011	13.57609627	-1.125773443	0.500741544	-2.24821259	0.024562637	0.044800668	1.125773443	-2.182185042	PALES_43011	putative short-chain dehydrogenase	PA1023	PA1023	probable short-chain dehydrogenase
PALES_43001	12.38295503	-1.218415215	0.5137754	-2.371493878	0.01771634	0.033468891	1.218415215	-2.326909683	PALES_43001	2-Nitropropane Dioxygenase	PA1024	PA1024	NADH:quinone reductase
PALES_42771	81.69334261	0.953484141	0.285392497	3.340957285	8.35E-04	0.002133236	0.953484141	1.936543812	PALES_42771	hypothetical protein	PA1046	PA1046	hypothetical protein
PALES_42761	95.42331127	-0.885184195	0.251988675	-3.512793567	4.43E-04	0.001204152	0.885184195	-1.847000421	PALES_42761	putative esterase	PA1047	PA1047	probable esterase
PALES_42741	158.673675	-0.897444985	0.23233849	-3.862661694	1.12E-04	3.41E-04	0.897444985	-1.862764102	pdxH	pyridoxamine 5'-phosphate oxidase	PA1049	pdxH	pyridoxine 5'-phosphate oxidase
PALES_42731	78.42528835	-2.204111404	0.300349296	-7.338493665	2.16E-13	2.01E-12	2.204111404	-4.607906376	PALES_42731	hypothetical protein	PA1050	PA1050	conserved hypothetical protein
PALES_42721	57.66112056	-2.074329559	0.326123439	-6.36056569	2.01E-10	1.36E-09	2.074329559	-4.211486551	PALES_42721	putative transporter	PA1051	PA1051	probable transporter
PALES_42621	62.80049034	1.88169193	0.324072863	5.806385361	6.38E-09	3.68E-08	1.88169193	3.685069759	PALES_42621	hypothetical protein	PA1060	PA1060	hypothetical protein
PALES_42611	111.8429146	0.995682431	0.264397926	3.765848108	1.66E-04	4.87E-04	0.995682431	1.994023526	PALES_42611	putative cysteine synthase	PA1061	PA1061	conserved hypothetical protein
PALES_42601	37.05933767	1.234298918	0.350020404	3.526362762	4.21E-04	0.001148038	1.234298918	2.352669909	PALES_42601	hypothetical protein	PA1062	PA1062	hypothetical protein
PALES_42591	20.49102344	1.282124394	0.454220775	2.8226899	0.004762261	0.010358898	1.282124394	2.431968249	PALES_42591	hypothetical protein	PA1063	PA1063	hypothetical protein
PALES_42581	48.68105903	-1.128275509	0.298904087	-3.774707533	1.60E-04	4.71E-04	1.128275509	-2.18597289	PALES_42581	hypothetical protein	PA1064	PA1064	hypothetical protein
PALES_42571	84.60810669	1.009097932	0.283736828	3.556457367	3.76E-04	0.001032556	1.009097932	2.012652264	PALES_42571	hypothetical protein	PA1065	PA1065	conserved hypothetical protein
PALES_42551	29.18000309	1.693732668	0.40383399	4.194131034	2.74E-05	9.32E-05	1.693732668	3.234925905	PALES_42551	putative transcriptional regulator	PA1067	PA1067	probable transcriptional regulator
PALES_42531	189.8274227	-0.673946981	0.252807235	-2.66585322	0.007679321	0.015746107	0.673946981	-1.595431846	PALES_42531	hypothetical protein	PA1069	PA1069	hypothetical protein
PALES_42451	155.2388077	-0.585686944	0.235186649	-2.490306941	0.012763282	0.024995636	0.585686944	-1.500753408	PALES_42451	hypothetical protein	PA1076	PA1076	hypothetical protein
PALES_42441	171.8954176	0.72757521	0.260840712	2.789346816	0.005281447	0.01132249	0.72757521	1.655853698	flgB	flagellar basal body rod protein FlgB	PA1077	flgB	flagellar basal-body rod protein FlgB
PALES_42431	79.71447511	0.777391546	0.282420366	2.752604409	0.005912329	0.012544902	0.777391546	1.714029032	flgC	flagellar basal body rod protein FlgC	PA1078	flgC	flagellar basal-body rod protein FlgC
PALES_42401	76.15525239	0.865175595	0.279902708	3.090986875	0.001994925	0.004695973	0.865175595	1.821561362	flgF	flagellar basal body rod protein FlgF	PA1081	flgF	flagellar basal-body rod protein FlgF
PALES_42391	334.6594025	0.725295181	0.212499812	3.413156818	6.42E-04	0.001686042	0.725295181	1.653238861	flgG	flagellar basal body rod protein FlgG	PA1082	flgG	flagellar basal-body rod protein FlgG
PALES_42371	117.9316052	0.770226065	0.249571566	3.086193186	0.002027371	0.004765273	0.770226065	1.705537014	flgI	flagellar basal body P-ring protein	PA1084	flgI	flagellar P-ring protein precursor FlgI
PALES_42331	132.0044307	0.706410418	0.234020048	3.018589324	0.002539545	0.005867608	0.706410418	1.631739118	PALES_42331	hypothetical protein	PA1088	PA1088	hypothetical protein
PALES_42291	8764.761777	0.992668715	0.183490934	5.409906065	6.31E-08	3.20E-07	0.992668715	1.989862461	fliC	flagellin type B	PA1092	fliC	flagellin type B
PALES_42261	377.2352809	1.496748594	0.223748219	6.689432436	2.24E-11	1.70E-10	1.496748594	2.822059869	fliS	flagellar protein FliS	PA1095	PA1095	hypothetical protein
PALES_42251	428.8998293	1.749060325	0.206448959	8.472119849	2.41E-17	3.22E-16	1.749060325	3.36139556	PALES_42251	hypothetical protein	PA1096	PA1096	hypothetical protein
PALES_42231	188.7191499	0.941509758	0.229269504	4.106563423	4.02E-05	1.32E-04	0.941509758	1.920537	fleS	two-component sensor	PA1098	fleS	two-component sensor
PALES_42221	1293.461477	-0.717440197	0.313977816	-2.28500283	0.022312662	0.041027342	0.717440197	-1.644261998	fleR	two-component response regulator	PA1099	fleR	two-component response regulator
PALES_42211	59.96641122	1.958853982	0.337882877	5.797434898	6.73E-09	3.87E-08	1.958853982	3.887530469	fliE	flagellar hook-basal body protein FliE	PA1100	fliE	flagellar hook-basal body complex protein FliE
PALES_42201	238.0086075	0.807153554	0.216903131	3.721262804	1.98E-04	5.75E-04	0.807153554	1.749755756	fliF	flagellar MS-ring protein	PA1101	fliF	Flagella M-ring outer membrane protein precursor
PALES_42161	43.61700226	1.181288019	0.328370557	3.597423686	3.21E-04	8.98E-04	1.181288019	2.267791522	fliJ	flagellar biosynthesis chaperone	PA1105	fliJ	flagellar protein FliJ
PALES_42151	97.53240293	1.346705252	0.284420691	4.73490606	2.19E-06	8.94E-06	1.346705252	2.543306353	PALES_42151	hypothetical protein	PA1106	PA1106	hypothetical protein
PALES_42141	40.02351315	2.650548971	0.418637989	6.331362748	2.43E-10	1.63E-09	2.650548971	6.279061625	PALES_42141	hypothetical protein	PA1107	roeA	RoeA
PALES_42101	24.3820775	1.461544333	0.44199223	3.306719514	9.44E-04	0.002384962	1.461544333	2.75403011	PALES_42101	hypothetical protein	PA1111	PA1111	hypothetical protein
PALES_42091	90.98169952	0.925049541	0.256423302	3.607509663	3.09E-04	8.65E-04	0.925049541	1.898749442	PALES_42091	putative dehydrogenase	PA1112	PA1112	conserved hypothetical protein
PALES_42051	32.15535025	0.896672156	0.386858974	2.317826951	0.020458728	0.038104681	0.896672156	1.861766517	PALES_42051	hypothetical protein	PA1114	PA1114	hypothetical protein
PALES_42041	132.396873	1.112777595	0.25209849	4.414058943	1.01E-05	3.68E-05	1.112777595	2.162616114	PALES_42041	hypothetical protein	PA1115	PA1115	hypothetical protein
PALES_42031	43.9949447	-1.742486791	0.345875378	-5.037903537	4.71E-07	2.09E-06	1.742486791	-3.346114447	PALES_42031	hypothetical protein	PA1116	PA1116	hypothetical protein
PALES_42011	201.8915737	1.038235164	0.254234251	4.083773765	4.43E-05	1.45E-04	1.038235164	2.053713826	PALES_42011	hypothetical protein	PA1118	PA1118	hypothetical protein
PALES_42001	231.9343769	-0.772353601	0.256703851	-3.008733985	0.002623387	0.006040777	0.772353601	-1.708054017	PALES_42001	putative outer membrane protein precursor	PA1119	yfiB	YfiB
PALES_41981	57.14121158	0.750706255	0.298145281	2.517920972	0.01180498	0.023301238	0.750706255	1.682616334	PALES_41981	hypothetical protein	PA1121	yfiR	YfiR
PALES_41961	65.15457824	-2.483952721	0.329178204	-7.545921004	4.49E-14	4.44E-13	2.483952721	-5.594280997	PALES_41961	hypothetical protein	PA1123	PA1123	hypothetical protein
PALES_41931	53.83366973	-0.675192716	0.303145708	-2.227287726	0.02592805	0.046948926	0.675192716	-1.596810061	PALES_41931	hypothetical protein	PA1126	PA1126	hypothetical protein
PALES_41891	121.3952385	0.588304774	0.265666774	2.214446187	0.026798101	0.048321945	0.588304774	1.503479059	rhlC	rhamnosyltransferase 2	PA1130	rhlC	rhamnosyltransferase 2
PALES_41881	41.8173885	1.001464579	0.330506253	3.030092684	0.002444787	0.005662427	1.001464579	2.002031369	PALES_41881	putative major facilitator superfamily (MFS) transporter	PA1131	PA1131	probable major facilitator superfamily (MFS) transporter
PALES_41871	32.16706719	-1.286114885	0.443375948	-2.900732192	0.003722919	0.008276054	1.286114885	-2.43870438	PALES_41871	hypothetical protein	PA1132	PA1132	hypothetical protein
PALES_41821	57.15235826	3.256441786	0.455759538	7.14508752	8.99E-13	7.80E-12	3.256441786	9.556231383	PALES_41821	putative oxidoreductase	PA1137	PA1137	probable oxidoreductase
PALES_41751	21.24021042	4.246761418	0.7303761	5.814485742	6.08E-09	3.52E-08	4.246761418	18.98464897	PALES_41751	putative major facilitator superfamily (MFS) transporter	PA1144	PA1144	probable major facilitator superfamily (MFS) transporter
PALES_41661	1092.851451	-1.20548197	0.190668066	-6.322411473	2.58E-10	1.71E-09	1.20548197	-2.306142992	nrdB	ribonucleotide-diphosphate reductase subunit beta	PA1155	nrdB	NrdB, tyrosyl radical-harboring component of class Ia ribonucleotide reductase
PALES_41621	1406.925442	-1.569838703	0.223535294	-7.022777814	2.17E-12	1.80E-11	1.569838703	-2.968715212	PALES_41621	putative cold-shock protein	PA1159	PA1159	probable cold-shock protein
PALES_41581	64.89628329	1.453588276	0.300336386	4.839867373	1.30E-06	5.45E-06	1.453588276	2.738884211	PALES_41581	putative glucosyl transferase	PA1163	ndvB	NdvB
PALES_41541	87.66574814	1.354380763	0.277591499	4.879042643	1.07E-06	4.50E-06	1.354380763	2.556873459	PALES_41541	hypothetical protein	PA1167	PA1167	hypothetical protein
PALES_41491	172.1054355	0.765001244	0.246359685	3.105220912	0.00190137	0.004498016	0.765001244	1.699371464	napC	cytochrome c-type protein NapC	PA1172	napC	cytochrome c-type protein NapC
PALES_41471	978.2444418	0.682784406	0.203521608	3.354849702	7.94E-04	0.002039901	0.682784406	1.605234876	napA	nitrate reductase catalytic subunit	PA1174	napA	periplasmic nitrate reductase protein NapA
PALES_41461	80.59876462	1.505053096	0.274223264	5.488422369	4.06E-08	2.12E-07	1.505053096	2.838351171	napD	NapD protein of periplasmic nitrate reductase	PA1175	napD	NapD protein of periplasmic nitrate reductase
PALES_41451	84.5791672	1.666836544	0.344825871	4.833850019	1.34E-06	5.61E-06	1.666836544	3.175175959	napF	ferredoxin protein NapF	PA1176	napF	ferredoxin protein NapF
PALES_41441	24.40765561	2.405182793	0.52508006	4.58060204	4.64E-06	1.78E-05	2.405182793	5.297026745	napE	periplasmic nitrate reductase protein NapE	PA1177	napE	periplasmic nitrate reductase protein NapE
PALES_41431	156.2275272	1.056074541	0.267210647	3.952217299	7.74E-05	2.44E-04	1.056074541	2.079266299	oprH	PhoP/Q and low Mg2+ inducible outer membrane protein H1 precursor	PA1178	oprH	PhoP/Q and low Mg2+ inducible outer membrane protein H1 precursor
PALES_41421	50.33542489	0.773572148	0.316588092	2.443465711	0.014546952	0.028083945	0.773572148	1.709497305	phoP	two-component response regulator PhoP	PA1179	phoP	two-component response regulator PhoP
PALES_41401	195.2076	1.254104364	0.26492976	4.733723994	2.20E-06	8.98E-06	1.254104364	2.385190282	PALES_41401	putative sensor protein	PA1181	PA1181	conserved hypothetical protein
PALES_41371	26.4761631	0.964088012	0.392178449	2.458289114	0.013960074	0.027084737	0.964088012	1.95082993	PALES_41371	putative transcriptional regulator	PA1184	PA1184	probable transcriptional regulator
PALES_41361	6.52927337	2.123562145	0.858707452	2.472975099	0.013399348	0.026155131	2.123562145	4.357685701	PALES_41361	putative glutathione S-transferase	PA1185	PA1185	probable glutathione S-transferase
PALES_41321	24.19171189	1.08804234	0.405043018	2.68623897	0.007226139	0.014958768	1.08804234	2.125853738	PALES_41321	hypothetical protein	PA1189	PA1189	conserved hypothetical protein
PALES_41311	1269.624215	4.385103747	0.250439146	17.50965778	1.21E-68	4.42E-66	4.385103747	20.89525916	PALES_41311	hypothetical protein	PA1190	PA1190	conserved hypothetical protein
PALES_41301	80.88702844	1.994849709	0.329197648	6.059732564	1.36E-09	8.54E-09	1.994849709	3.985745819	PALES_41301	hypothetical protein	PA1191	PA1191	hypothetical protein
PALES_41171	142.7749886	-0.816029927	0.257727813	-3.166247053	0.001544196	0.003721567	0.816029927	-1.760554548	PALES_41171	putative ATPase of the PP-loop superfamily	PA1192	PA1192	conserved hypothetical protein
PALES_41161	79.82277714	-1.378905176	0.270066939	-5.105790373	3.29E-07	1.51E-06	1.378905176	-2.600709351	PALES_41161	hypothetical protein	PA1193	PA1193	hypothetical protein
PALES_41141	34.44361309	-2.847854432	0.452786618	-6.289617045	3.18E-10	2.10E-09	2.847854432	-7.199288994	PALES_41141	putative dimethylarginine dimethylaminohydrolase	PA1195	ddaH	dimethylarginine dimethylaminohydrolase DdaH
PALES_41131	23.29880122	-1.834781436	0.409507908	-4.480454224	7.45E-06	2.76E-05	1.834781436	-3.56717362	PALES_41131	putative transcriptional regulator	PA1196	ddaR	transcriptional regulator DdaR
PALES_41021	42.67147213	-0.915751641	0.328691534	-2.786051804	0.005335434	0.011412501	0.915751641	-1.886551706	kefB	glutathione-regulated potassium-efflux system protein KefB	PA1207	kefB	glutathione-regulated potassium-efflux system protein KefB
PALES_41011	46.75196538	1.851114454	0.364086665	5.084268748	3.69E-07	1.67E-06	1.851114454	3.607787721	PALES_41011	putative flavoprotein involved in K+ transport	PA1208	PA1208	conserved hypothetical protein
PALES_40981	14.48979559	1.182806267	0.511030086	2.314553092	0.020637403	0.038422415	1.182806267	2.270179331	PALES_40981	hypothetical protein	PA1211	PA1211	hypothetical protein
PALES_40931	71.13782624	-0.72749235	0.279671236	-2.601241234	0.009288711	0.018683512	0.72749235	-1.655758598	PALES_40931	hypothetical protein	PA1216	PA1216	hypothetical protein
PALES_40911	61.06891724	0.819288481	0.311060433	2.633856297	0.008442121	0.017140173	0.819288481	1.764535531	PALES_40911	hypothetical protein	PA1218	PA1218	hypothetical protein
PALES_40881	46.56056615	0.789484314	0.329595904	2.395309847	0.016606325	0.031471932	0.789484314	1.728456522	PALES_40881	putative AMP-binding enzyme	PA1221	PA1221	hypothetical protein
PALES_40871	38.43460448	-1.198645477	0.328550761	-3.648280932	2.64E-04	7.48E-04	1.198645477	-2.295240733	PALES_40871	putative membrane-bound lytic murein transglycolase A	PA1222	PA1222	probable membrane-bound lytic murein transglycolase A
PALES_40811	10.80427568	-1.58675331	0.553748583	-2.865476062	0.004163828	0.009166204	1.58675331	-3.003726196	PALES_40811	hypothetical protein	PA1228	PA1228	hypothetical protein
PALES_40681	1247.760375	-1.54868418	0.205786606	-7.525680164	5.24E-14	5.13E-13	1.54868418	-2.925501949	PALES_40681	hypothetical protein	PA1244	PA1244	hypothetical protein
PALES_40671	347.6025726	-1.632846194	0.264991342	-6.16188506	7.19E-10	4.64E-09	1.632846194	-3.101242184	PALES_40671	hypothetical protein	PA1245	aprX	AprX
PALES_40661	113.7199162	-1.433592681	0.271426062	-5.281706068	1.28E-07	6.22E-07	1.433592681	-2.70118543	aprD	alkaline protease secretion protein AprD	PA1246	aprD	alkaline protease secretion protein AprD
PALES_40651	82.38202478	-1.300131382	0.284003978	-4.577863273	4.70E-06	1.80E-05	1.300131382	-2.46251307	aprE	alkaline protease secretion protein AprE	PA1247	aprE	alkaline protease secretion protein AprE
PALES_40641	82.9695338	-1.298040507	0.274282349	-4.73249741	2.22E-06	9.03E-06	1.298040507	-2.458946774	aprF	Alkaline protease secretion outer membrane protein AprF precursor	PA1248	aprF	Alkaline protease secretion outer membrane protein AprF precursor
PALES_40631	2037.802572	-2.071623803	0.213223921	-9.715719471	2.58E-22	5.59E-21	2.071623803	-4.203595365	aprA	alkaline metalloproteinase precursor	PA1249	aprA	alkaline metalloproteinase precursor
PALES_40621	79.21327864	-1.359470088	0.272123216	-4.995788709	5.86E-07	2.57E-06	1.359470088	-2.565909145	aprI	alkaline proteinase inhibitor AprI	PA1250	aprI	alkaline proteinase inhibitor AprI
PALES_40591	13.20706133	2.451176997	0.613953992	3.992444106	6.54E-05	2.08E-04	2.451176997	5.468620684	PALES_40591	putative semialdehyde dehydrogenase	PA1253	lhpG	alpha-ketoglutaric semialdehyde dehydrogenase, LhpG
PALES_40581	30.3359478	4.835648191	0.718393088	6.731200889	1.68E-11	1.30E-10	4.835648191	28.55453907	PALES_40581	putative dihydrodipicolinate synthetase	PA1254	lhpC	delta1-pyrroline-4-hydroxy-2-carboxylate deaminase, LphC
PALES_40571	35.04621775	3.435849134	0.495021603	6.940806456	3.90E-12	3.14E-11	3.435849134	10.82165415	PALES_40571	putative proline racemase protein	PA1255	lhpK	D-hydroxyproline epimerase, LhpK
PALES_40561	31.00267019	3.78549083	0.546687633	6.924412781	4.38E-12	3.52E-11	3.78549083	13.78942916	PALES_40561	amino acid ABC transporter ATP binding protein	PA1256	lhpO	ABC transporter ATP-binding protein, LhpO
PALES_40541	6.381180829	4.712318342	1.297853934	3.630854149	2.82E-04	7.96E-04	4.712318342	26.21495823	PALES_40541	putative permease of ABC transporter	PA1258	lhpM	Permease of ABC transporter, LhpM
PALES_40531	36.88704681	4.079851925	0.549191456	7.428833577	1.10E-13	1.05E-12	4.079851925	16.9105529	PALES_40531	hypothetical protein	PA1259	lhpH	LhpH
PALES_40521	92.42287634	4.310872041	0.401585736	10.73462441	7.00E-27	2.23E-25	4.310872041	19.84731633	PALES_40521	amino acid ABC transporter periplasmic binding protein	PA1260	lhpP	ABC transporter periplasmic-binding protein, LhpP
PALES_40481	19.51355506	2.109831621	0.488198264	4.32166965	1.55E-05	5.46E-05	2.109831621	4.316409143	PALES_40481	putative transcriptional regulator	PA1264	PA1264	probable transcriptional regulator
PALES_40411	118.3487436	-2.79748542	0.265671171	-10.52987951	6.29E-26	1.89E-24	2.79748542	-6.952276301	PALES_40411	putative tonB-dependent receptor	PA1271	PA1271	probable tonB-dependent receptor
PALES_40401	41.74924315	-2.118247771	0.345211697	-6.136083429	8.46E-10	5.43E-09	2.118247771	-4.341663069	cobO	cob(I)yrinic acid a,c-diamide adenosyltransferase	PA1272	cobO	cob(I)alamin adenosyltransferase
PALES_40391	38.36164479	-2.606984102	0.368580679	-7.073035165	1.52E-12	1.28E-11	2.606984102	-6.092287822	cobB	cobyrinic acid a,c-diamide synthase	PA1273	cobB	cobyrinic acid a,c-diamide synthase
PALES_40351	31.51246335	-2.693647225	0.392009481	-6.871382848	6.36E-12	5.04E-11	2.693647225	-6.469468645	cobQ	cobyric acid synthase	PA1277	cobQ	cobyric acid synthase
PALES_40331	14.65624803	-2.021081941	0.510579215	-3.958410137	7.55E-05	2.38E-04	2.021081941	-4.058880712	cobT	nicotinate-nucleotide--dimethylbenzimidazole phosphoribosyltransferase	PA1279	cobU	nicotinate-nucleotide--dimethylbenzimidazole phosphoribosyltransferase
PALES_40321	9.188193899	-2.650817316	0.679978677	-3.898383003	9.68E-05	2.99E-04	2.650817316	-6.280229653	PALES_40321	putative alpha-ribazole-5'-phosphate phosphatase	PA1280	PA1280	hypothetical protein
PALES_40271	46.79250564	1.224697247	0.341685706	3.584280015	3.38E-04	9.40E-04	1.224697247	2.337064007	PALES_40271	putative transcriptional regulator	PA1285	PA1285	probable transcriptional regulator
PALES_40241	799.8817082	-0.89830943	0.221181107	-4.061420259	4.88E-05	1.59E-04	0.89830943	-1.863880582	PALES_40241	putative outer membrane protein precursor	PA1288	PA1288	probable outer membrane protein precursor
PALES_40231	239.3730733	0.622981259	0.259459235	2.401075678	0.016346955	0.031054644	0.622981259	1.540054342	PALES_40231	hypothetical protein	PA1289	PA1289	hypothetical protein
PALES_38891	116.8645882	-2.195444284	0.255849763	-8.580990108	9.41E-18	1.32E-16	2.195444284	-4.58030695	PALES_38891	putative enzyme	PA1293	PA1293	hypothetical protein
PALES_38861	51.56836463	0.742027317	0.307208867	2.415383793	0.015718637	0.029995334	0.742027317	1.672524469	PALES_38861	putative 2-hydroxyacid dehydrogenase	PA1296	PA1296	probable 2-hydroxyacid dehydrogenase
PALES_38831	15.21233951	-1.089525937	0.474096104	-2.29811198	0.021555417	0.039850702	1.089525937	-2.128040985	PALES_38831	hypothetical protein	PA1299	PA1299	conserved hypothetical protein
PALES_38821	103.1874743	2.159889584	0.294295337	7.339190645	2.15E-13	2.00E-12	2.159889584	4.468806521	PALES_38821	putative sigma-70 factor, ECF subfamily	PA1300	PA1300	ECF sigma factor
PALES_38811	75.27951414	1.89905087	0.321124958	5.913744239	3.34E-09	2.00E-08	1.89905087	3.729677454	PALES_38811	putative transmembrane sensor	PA1301	PA1301	probable transmembrane sensor
PALES_38801	114.2159561	2.319952159	0.268896622	8.627673125	6.26E-18	8.99E-17	2.319952159	4.993156615	PALES_38801	putative heme utilization protein precursor	PA1302	PA1302	probable heme utilization protein precursor
PALES_38591	20.3090263	1.613909291	0.475367485	3.395077157	6.86E-04	0.001790544	1.613909291	3.060801087	PALES_38591	putative TonB-dependent receptor	PA1322	PA1322	probable TonB-dependent receptor
PALES_38561	14.01482372	1.199700912	0.510097929	2.351903124	0.018677639	0.0351453	1.199700912	2.296920481	PALES_38561	hypothetical protein	PA1325	PA1325	conserved hypothetical protein
PALES_38551	31.33177004	1.03920211	0.381743688	2.722250928	0.006483889	0.013623903	1.03920211	2.05509076	ilvA2	threonine dehydratase	PA1326	ilvA2	threonine dehydratase, biosynthetic
PALES_38541	233.4080674	0.689182902	0.217325605	3.171199739	0.001518107	0.003666125	0.689182902	1.612370063	PALES_38541	putative protease	PA1327	PA1327	probable protease
PALES_38531	102.4945745	2.548948921	0.301055215	8.466715705	2.52E-17	3.36E-16	2.548948921	5.852077684	PALES_38531	putative transcriptional regulator	PA1328	PA1328	probable transcriptional regulator
PALES_38491	15.08068819	1.760099295	0.557392337	3.157738595	0.001589981	0.003818363	1.760099295	3.38721437	PALES_38491	hypothetical protein	PA1332	PA1332	hypothetical protein
PALES_38481	31.73500928	2.164788486	0.476471761	4.543372058	5.54E-06	2.10E-05	2.164788486	4.484006861	PALES_38481	hypothetical protein	PA1333	PA1333	hypothetical protein
PALES_38441	601.2866425	-1.134452155	0.218354671	-5.19545632	2.04E-07	9.63E-07	1.134452155	-2.195351813	ansB	glutaminase-asparaginase	PA1337	ansB	glutaminase-asparaginase
PALES_38431	283.1808349	0.634375216	0.223683941	2.836033797	0.004567761	0.009972316	0.634375216	1.552265369	ggt	gamma-glutamyltranspeptidase precursor	PA1338	ggt	gamma-glutamyltranspeptidase precursor
PALES_38421	243.6301469	0.664711202	0.209030201	3.179976856	0.001472868	0.003562303	0.664711202	1.585250906	PALES_38421	amino acid ABC transporter ATP binding protein	PA1339	aatP	AatP
PALES_38401	131.9752015	0.628227603	0.259017912	2.425421464	0.015290624	0.029352812	0.628227603	1.545664927	PALES_38401	amino acid ABC transporter membrane protein	PA1341	aatQ	AatQ
PALES_38361	29.7718761	0.876653865	0.391384665	2.239877909	0.02509885	0.045673568	0.876653865	1.836111747	PALES_38361	putative glutathione synthase	PA1345	PA1345	hypothetical protein
PALES_38321	43.61777817	1.250988205	0.32868552	3.806033817	1.41E-04	4.20E-04	1.250988205	2.380043934	PALES_38321	hypothetical protein	PA1349	PA1349	conserved hypothetical protein
PALES_38311	49.48433456	0.970472897	0.310636876	3.124139376	0.00178326	0.0042397	0.970472897	1.959482783	PALES_38311	hypothetical protein	PA1350	PA1350	hypothetical protein
PALES_38301	13.04014752	1.371214533	0.559188575	2.452150478	0.014200526	0.027482093	1.371214533	2.586882511	PALES_38301	putative sigma-70 factor, ECF subfamily	PA1351	PA1351	probable sigma-70 factor, ECF subfamily
PALES_38271	110.4663728	-0.690396916	0.257193328	-2.684350021	0.007267098	0.015037011	0.690396916	-1.613727428	PALES_38271	hypothetical protein	PA1354	PA1354	hypothetical protein
PALES_38251	37.58705895	1.667218027	0.359564032	4.636776423	3.54E-06	1.39E-05	1.667218027	3.176015662	PALES_38251	hypothetical protein	PA1356	PA1356	hypothetical protein
PALES_38231	86.890482	1.322258345	0.283568364	4.66292617	3.12E-06	1.24E-05	1.322258345	2.500572346	PALES_38231	hypothetical protein	PA1358	PA1358	hypothetical protein
PALES_38201	23.10139256	-1.019146998	0.431680599	-2.360882095	0.018231526	0.034346635	1.019146998	-2.026720295	PALES_38201	putative transporter	PA1361	norM	NorM
PALES_38181	27.42305386	2.044110819	0.428039555	4.775518513	1.79E-06	7.39E-06	2.044110819	4.124190058	PALES_38181	putative sigma-70 factor, ECF subfamily	PA1363	PA1363	ECF sigma factor
PALES_38171	13.14567589	1.434498043	0.54054752	2.653787115	0.007959402	0.016278262	1.434498043	2.702881089	PALES_38171	putative transmembrane sensor	PA1364	PA1364	probable transmembrane sensor
PALES_38151	562.685526	2.06888741	0.207006517	9.994310501	1.61E-23	3.86E-22	2.06888741	4.195629866	PALES_38151	hypothetical protein	PA1366	PA1366	hypothetical protein
PALES_38111	7.693458974	1.556374417	0.703535693	2.212218132	0.026951597	0.048561895	1.556374417	2.941137875	PALES_38111	putative transcriptional regulator	PA1374	PA1374	hypothetical protein
PALES_40171	23.266849	-0.982165853	0.389216994	-2.523440313	0.011621279	0.02296724	0.982165853	-1.975428807	PALES_40171	putative two-component sensor	PA1396	PA1396	probable two-component sensor
PALES_40091	43.43376325	1.321072261	0.379513812	3.480959634	5.00E-04	0.001337667	1.321072261	2.498517393	PALES_40091	hypothetical protein	PA1404	PA1404	hypothetical protein
PALES_40001	17.58131926	1.770365217	0.489515388	3.616567037	2.99E-04	8.37E-04	1.770365217	3.41140305	PALES_40001	putative transcriptional regulator	PA1413	PA1413	probable transcriptional regulator
PALES_39991	698.1786984	-3.211013136	0.275034487	-11.67494729	1.71E-31	8.06E-30	3.211013136	-9.260006048	PALES_39991	hypothetical protein	PA1414	PA1414	hypothetical protein
PALES_39981	49.39497649	1.418043173	0.32863615	4.314933623	1.60E-05	5.61E-05	1.418043173	2.672228123	PALES_39981	putative hydrolase	PA1415	PA1415	hypothetical protein
PALES_39941	16.40743756	1.696326227	0.547519156	3.098204346	0.001946971	0.004596747	1.696326227	3.24074662	PALES_39941	putative transporter	PA1419	PA1419	probable transporter
PALES_39901	296.3299997	2.380691969	0.226666017	10.50308292	8.36E-26	2.48E-24	2.380691969	5.207864705	PALES_39901	putative chemotaxis transducer	PA1423	bdlA	BdlA
PALES_39881	31.97575021	0.884846679	0.361278772	2.449207499	0.014317094	0.027673896	0.884846679	1.846568368	PALES_39881	putative ATP-binding component of ABC transporter	PA1425	PA1425	probable ATP-binding component of ABC transporter
PALES_39851	207.0621361	-3.22130738	0.260872756	-12.34819392	4.98E-35	3.00E-33	3.22130738	-9.326316432	PALES_39851	putative cation-transporting P-type ATPase	PA1429	PA1429	probable cation-transporting P-type ATPase
PALES_39721	214.3156429	1.063357382	0.221060503	4.810254968	1.51E-06	6.27E-06	1.063357382	2.089789141	PALES_39721	putative flagellar hook-length control protein FliK	PA1441	PA1441	putative flagellar hook-length control protein FliK
PALES_39611	247.000846	0.622946248	0.238273028	2.614422008	0.008937856	0.018061839	0.622946248	1.540016969	flhA	flagellar biosynthesis protein FlhA	PA1452	flhA	flagellar biosynthesis protein FlhA
PALES_39551	846.4711946	0.969137912	0.193801403	5.000675427	5.71E-07	2.50E-06	0.969137912	1.957670432	PALES_39551	putative two-component sensor	PA1458	PA1458	probable two-component sensor
PALES_39541	321.0020847	0.721008844	0.212637742	3.390784903	6.97E-04	0.001813843	0.721008844	1.648334274	PALES_39541	chemotaxis-specific methylesterase	PA1459	PA1459	probable methyltransferase
PALES_39531	110.7236716	1.166965955	0.257439121	4.532978321	5.82E-06	2.19E-05	1.166965955	2.245389857	motC	flagellar motor protein	PA1460	motC	MotC
PALES_39521	176.347996	1.030922654	0.231020836	4.462466127	8.10E-06	2.97E-05	1.030922654	2.043330615	motD	flagellar motor protein MotD	PA1461	motD	MotD
PALES_39511	301.1740362	0.877984498	0.203805947	4.307943462	1.65E-05	5.77E-05	0.877984498	1.83780602	PALES_39511	putative plasmid partitioning protein	PA1462	PA1462	probable plasmid partitioning protein
PALES_39501	289.7979987	1.03217222	0.213897819	4.825538784	1.40E-06	5.83E-06	1.03217222	2.045101178	PALES_39501	putative CheW domain protein	PA1463	PA1463	hypothetical protein
PALES_39491	474.1575371	0.894855866	0.197451176	4.532036133	5.84E-06	2.20E-05	0.894855866	1.859424109	PALES_39491	putative purine-binding chemotaxis protein	PA1464	PA1464	probable purine-binding chemotaxis protein
PALES_39481	74.69981126	1.316282426	0.31616777	4.163240371	3.14E-05	1.06E-04	1.316282426	2.490235918	PALES_39481	hypothetical protein	PA1465	PA1465	hypothetical protein
PALES_39461	27.03785476	2.087760706	0.443385599	4.708679562	2.49E-06	1.01E-05	2.087760706	4.250877564	PALES_39461	putative transcriptional regulator	PA1467	PA1467	hypothetical protein
PALES_39451	14.41272459	1.466175383	0.537297693	2.728795233	0.006356616	0.013409809	1.466175383	2.76288475	PALES_39451	hypothetical protein	PA1468	PA1468	hypothetical protein
PALES_39421	151.7782322	0.677136724	0.288577786	2.346461702	0.018952614	0.035564198	0.677136724	1.598963187	PALES_39421	hypothetical protein	PA1471	PA1471	hypothetical protein
PALES_39411	48.08475088	0.979188375	0.330072219	2.96658828	0.003011239	0.006831317	0.979188375	1.971356061	PALES_39411	hypothetical protein	PA1472	PA1472	conserved hypothetical protein
PALES_39401	35.73812958	1.947266014	0.390761491	4.98325976	6.25E-07	2.72E-06	1.947266014	3.856430239	PALES_39401	putative FlhB domain protein	PA1473	PA1473	hypothetical protein
PALES_39391	215.3451757	1.504650224	0.227066849	6.62646366	3.44E-11	2.55E-10	1.504650224	2.837558674	PALES_39391	hypothetical protein	PA1474	PA1474	hypothetical protein
PALES_39381	42.68442673	-1.597252097	0.342640112	-4.661602768	3.14E-06	1.24E-05	1.597252097	-3.025664654	ccmA	cytochrome c biogenesis protein CcmA	PA1475	ccmA	heme exporter protein CcmA
PALES_39371	17.32303373	-1.908350173	0.4675853	-4.081287782	4.48E-05	1.47E-04	1.908350173	-3.753795801	ccmB	heme exporter protein CcmB	PA1476	ccmB	heme exporter protein CcmB
PALES_39361	52.77764315	-1.378763534	0.302421472	-4.559079499	5.14E-06	1.96E-05	1.378763534	-2.600454029	ccmC	heme exporter protein CcmC	PA1477	ccmC	heme exporter protein CcmC
PALES_39341	33.08025779	-2.027664728	0.373398069	-5.430303202	5.63E-08	2.88E-07	2.027664728	-4.077443053	ccmE	cytochrome C-type biogenesis protein CcmE	PA1479	ccmE	cytochrome C-type biogenesis protein CcmE
PALES_39331	100.1790423	-1.611839141	0.267076855	-6.035113538	1.59E-09	9.87E-09	1.611839141	-3.056412236	ccmF	cytochrome C-type biogenesis protein CcmF	PA1480	ccmF	cytochrome C-type biogenesis protein CcmF
PALES_39321	63.76854532	-2.174502139	0.311940802	-6.970880766	3.15E-12	2.57E-11	2.174502139	-4.514299507	ccmG	cytochrome C biogenesis protein CcmG	PA1481	ccmG	cytochrome C biogenesis protein CcmG
PALES_39311	50.44370937	-2.411953787	0.326070048	-7.397041848	1.39E-13	1.32E-12	2.411953787	-5.321945689	ccmH	cytochrome C-type biogenesis protein CcmH	PA1482	ccmH	cytochrome C-type biogenesis protein CcmH
PALES_39301	60.99919675	-2.183434559	0.309698827	-7.050186723	1.79E-12	1.50E-11	2.183434559	-4.542336415	cycH	cytochrome c-type biogenesis protein	PA1483	cycH	cytochrome c-type biogenesis protein
PALES_39271	12.66153799	1.852654614	0.627268918	2.953525294	0.003141669	0.007096738	1.852654614	3.611641299	PALES_39271	putative amino acid permease	PA1485	PA1485	probable amino acid permease
PALES_39251	22.05329746	0.918688227	0.412120419	2.229174254	0.025802313	0.046774685	0.918688227	1.890395666	PALES_39251	putative carbohydrate kinase	PA1487	PA1487	probable carbohydrate kinase
PALES_39211	16.75023185	3.241375312	0.636881009	5.089451981	3.59E-07	1.63E-06	3.241375312	9.456952246	PALES_39211	putative transporter	PA1491	PA1491	probable transporter
PALES_39181	172.525423	3.100500089	0.276185527	11.22614978	3.03E-29	1.20E-27	3.100500089	8.577160331	PALES_39181	putative mucoidy inhibitor A	PA1494	muiA	mucoidy inhibitor gene A
PALES_39071	88.81743735	-1.401525244	0.262274886	-5.343726454	9.11E-08	4.52E-07	1.401525244	-2.641807314	PALES_39071	putative transcriptional regulator	PA1504	PA1504	probable transcriptional regulator
PALES_39061	196.7860635	1.299452636	0.229010613	5.674202699	1.39E-08	7.75E-08	1.299452636	2.461354803	moaA2	molybdenum cofactor biosynthesis protein A	PA1505	moaA2	molybdopterin biosynthetic protein A2
PALES_56611	21.7295049	-1.72732051	0.454355326	-3.801695304	1.44E-04	4.26E-04	1.72732051	-3.311122785	hcpB	secreted protein Hcp	PA1512	hcpA	secreted protein Hcp
PALES_38051	171.7155684	0.704278818	0.256231055	2.74860835	0.005984885	0.012670583	0.704278818	1.629329983	xdhB	xanthine dehydrogenase	PA1523	xdhB	xanthine dehydrogenase
PALES_38041	74.98480023	0.729590481	0.270569071	2.696503623	0.007007164	0.014568895	0.729590481	1.658168342	xdhA	xanthine dehydrogenase	PA1524	xdhA	xanthine dehydrogenase
PALES_38021	121.6137178	0.993941933	0.279014073	3.562336197	3.68E-04	0.001013213	0.993941933	1.991619344	PALES_38021	putative transcriptional regulator	PA1526	PA1526	probable transcriptional regulator
PALES_38011	762.1877617	0.782606651	0.215579362	3.630248476	2.83E-04	7.97E-04	0.782606651	1.720236177	PALES_38011	putative chromosome segregation protein	PA1527	PA1527	conserved hypothetical protein
PALES_37961	252.509527	-0.933524066	0.220434248	-4.234932062	2.29E-05	7.84E-05	0.933524066	-1.909935696	dnaX	DNA polymerase III subunits gamma and tau	PA1532	dnaX	DNA polymerase subunits gamma and tau
PALES_37951	259.8982604	-0.792078729	0.208179375	-3.80478964	1.42E-04	4.21E-04	0.792078729	-1.731567622	PALES_37951	hypothetical protein	PA1533	PA1533	conserved hypothetical protein
PALES_37941	69.07087301	-0.635709129	0.283949579	-2.238809898	0.025168288	0.045782406	0.635709129	-1.553701254	recR	recombination protein RecR	PA1534	recR	recombination protein RecR
PALES_37931	32.97071559	-2.127223477	0.403981662	-5.265643664	1.40E-07	6.76E-07	2.127223477	-4.368758861	PALES_37931	putative acyl-CoA dehydrogenase	PA1535	PA1535	citronellyl-CoA dehydrogenase
PALES_37911	12.82104889	1.446294799	0.575839948	2.511626371	0.012017625	0.023671834	1.446294799	2.725072852	PALES_37911	putative short-chain dehydrogenase	PA1537	PA1537	probable short-chain dehydrogenase
PALES_37901	38.12485604	2.465249807	0.401738999	6.136446329	8.44E-10	5.42E-09	2.465249807	5.522225519	PALES_37901	putative flavin-containing monooxygenase	PA1538	PA1538	probable flavin-containing monooxygenase
PALES_37891	35.727669	1.259141158	0.353100127	3.565960651	3.63E-04	0.00100047	1.259141158	2.393532107	PALES_37891	hypothetical protein	PA1539	PA1539	hypothetical protein
PALES_37851	90.93511432	-0.943501647	0.262432177	-3.595220895	3.24E-04	9.04E-04	0.943501647	-1.923190463	apt	adenine phosphoribosyltransferase	PA1543	apt	adenine phosphoribosyltransferase
PALES_37831	344.2759342	1.076387306	0.227134432	4.738987815	2.15E-06	8.78E-06	1.076387306	2.108748886	PALES_37831	hypothetical protein	PA1545	PA1545	hypothetical protein
PALES_37821	603.6842102	-3.760788193	0.248734793	-15.11967083	1.20E-51	2.38E-49	3.760788193	-13.55532871	hemN	coproporphyrinogen III oxidase	PA1546	hemN	oxygen-independent coproporphyrinogen III oxidase
PALES_37791	90.28963362	-0.891916058	0.291747517	-3.057150472	0.002234521	0.005206649	0.891916058	-1.855638981	PALES_37791	putative cation-transporting P-type ATPase	PA1549	PA1549	probable cation-transporting P-type ATPase
PALES_37781	71.05787998	-1.62290777	0.279849704	-5.799212029	6.66E-09	3.83E-08	1.62290777	-3.079951793	PALES_37781	hypothetical protein	PA1550	PA1550	hypothetical protein
PALES_37771	472.9398692	-1.393000667	0.24436652	-5.700456294	1.19E-08	6.70E-08	1.393000667	-2.626243464	PALES_37771	putative ferredoxin	PA1551	PA1551	probable ferredoxin
PALES_37761	596.1622015	-1.295285482	0.218481605	-5.928579121	3.06E-09	1.83E-08	1.295285482	-2.454255557	ccoP1	Cytochrome c oxidase, cbb3-type, CcoP subunit	PA1552	ccoP1	Cytochrome c oxidase, cbb3-type, CcoP subunit
PALES_37761	596.1622015	-1.295285482	0.218481605	-5.928579121	3.06E-09	1.83E-08	1.295285482	-2.454255557	ccoP1	Cytochrome c oxidase, cbb3-type, CcoP subunit	PA1552	ccoQ1	Cytochrome c oxidase, cbb3-type, CcoQ subunit
PALES_37751	129.8308279	-1.031149221	0.272231891	-3.787760569	1.52E-04	4.50E-04	1.031149221	-2.043651533	ccoO1	Cytochrome c oxidase, cbb3-type, CcoO subunit	PA1553	ccoO1	Cytochrome c oxidase, cbb3-type, CcoO subunit
PALES_37751	129.8308279	-1.031149221	0.272231891	-3.787760569	1.52E-04	4.50E-04	1.031149221	-2.043651533	ccoQ1	Cytochrome c oxidase, cbb3-type, CcoQ subunit	PA1553	ccoO1	Cytochrome c oxidase, cbb3-type, CcoO subunit
PALES_37741	397.4258496	-1.205298063	0.220010322	-5.478370527	4.29E-08	2.24E-07	1.205298063	-2.305849036	ccoN1	Cytochrome c oxidase, cbb3-type, CcoN subunit	PA1554	ccoN1	Cytochrome c oxidase, cbb3-type, CcoN subunit
PALES_37731	1009.226385	-4.721221173	0.233448646	-20.22381046	6.04E-91	2.87E-87	4.721221173	-26.37723018	ccoP2	Cytochrome c oxidase, cbb3-type, CcoP subunit	PA1555	ccoP2	Cytochrome c oxidase, cbb3-type, CcoP subunit
PALES_37731	1009.226385	-4.721221173	0.233448646	-20.22381046	6.04E-91	2.87E-87	4.721221173	-26.37723018	ccoP2	Cytochrome c oxidase, cbb3-type, CcoP subunit	PA1555	ccoQ2	Cytochrome c oxidase, cbb3-type, CcoQ subunit
PALES_37721	316.642335	-5.050431842	0.304574504	-16.58192584	9.42E-62	2.80E-59	5.050431842	-33.1383954	ccoO2	Cytochrome c oxidase, cbb3-type, CcoO subunit	PA1556	ccoO2	Cytochrome c oxidase, cbb3-type, CcoO subunit
PALES_37721	316.642335	-5.050431842	0.304574504	-16.58192584	9.42E-62	2.80E-59	5.050431842	-33.1383954	ccoQ2	Cytochrome c oxidase, cbb3-type, CcoQ subunit	PA1556	ccoO2	Cytochrome c oxidase, cbb3-type, CcoO subunit
PALES_37711	536.4272256	-3.868391171	0.287554652	-13.45271638	2.97E-41	2.88E-39	3.868391171	-14.60500727	ccoN2	Cytochrome c oxidase, cbb3-type, CcoN subunit	PA1557	ccoN2	Cytochrome c oxidase, cbb3-type, CcoN subunit
PALES_37691	56.14358074	2.716104913	0.36211969	7.500572289	6.35E-14	6.15E-13	2.716104913	6.57096343	PALES_37691	hypothetical protein	PA1559	PA1559	hypothetical protein
PALES_37661	36.87704077	-0.779226847	0.338327105	-2.303175934	0.021268946	0.039413032	0.779226847	-1.716210894	PALES_37661	putative RNA 2'-O-ribose methyltransferase	PA1563	PA1563	conserved hypothetical protein
PALES_37641	16.02883665	1.436779921	0.505981994	2.839587055	0.004517197	0.009870988	1.436779921	2.707159556	PALES_37641	putative oxidoreductase	PA1565	pauB2	FAD-dependent oxidoreductase
PALES_37631	19.25664202	1.73224597	0.474478244	3.65084383	2.61E-04	7.42E-04	1.73224597	3.322446504	PALES_37631	putative glutamine synthetase	PA1566	pauA3	Glutamylpolyamine synthetase
PALES_37581	51.83408065	1.920854335	0.335972816	5.717290925	1.08E-08	6.13E-08	1.920854335	3.786472195	PALES_37581	putative transcriptional regulator	PA1570	PA1570	probable transcriptional regulator
PALES_37571	201.8121635	0.711166425	0.306169585	2.322786001	0.020190651	0.037649627	0.711166425	1.637127207	PALES_37571	hypothetical protein	PA1571	PA1571	hypothetical protein
PALES_37561	117.126523	1.197688474	0.261886753	4.573306813	4.80E-06	1.84E-05	1.197688474	2.293718704	PALES_37561	putative ATP-NAD kinase	PA1572	PA1572	conserved hypothetical protein
PALES_37551	43.96607294	1.006594958	0.352623268	2.854590296	0.004309238	0.009455665	1.006594958	2.009163481	PALES_37551	putative periplasmic protein	PA1573	PA1573	conserved hypothetical protein
PALES_37541	98.76059442	-1.082549213	0.269581576	-4.015664685	5.93E-05	1.90E-04	1.082549213	-2.117774842	PALES_37541	hypothetical protein	PA1574	PA1574	conserved hypothetical protein
PALES_37531	77.96912013	1.17625449	0.291369082	4.036991435	5.41E-05	1.75E-04	1.17625449	2.259893037	PALES_37531	putative exonuclease	PA1575	PA1575	hypothetical protein
PALES_37471	1773.757935	-2.283251014	0.241322498	-9.461409658	3.04E-21	5.92E-20	2.283251014	-4.867736297	gltA	type II citrate synthase	PA1580	gltA	citrate synthase
PALES_37461	529.829604	-0.820701866	0.26720445	-3.071437864	0.002130305	0.004980138	0.820701866	-1.766265065	sdhC	succinate dehydrogenase (C subunit)	PA1581	sdhC	succinate dehydrogenase (C subunit)
PALES_37451	403.2746881	-1.234483483	0.257109618	-4.801389743	1.58E-06	6.53E-06	1.234483483	-2.352970908	sdhD	succinate dehydrogenase (D subunit)	PA1582	sdhD	succinate dehydrogenase (D subunit)
PALES_37441	870.7281451	-1.381287806	0.215692942	-6.403954593	1.51E-10	1.04E-09	1.381287806	-2.605008005	sdhA	succinate dehydrogenase flavoprotein subunit	PA1583	sdhA	succinate dehydrogenase (A subunit)
PALES_37431	743.5791435	-1.446576316	0.205958024	-7.02364631	2.16E-12	1.80E-11	1.446576316	-2.725604653	sdhB	succinate dehydrogenase iron-sulfur subunit	PA1584	sdhB	succinate dehydrogenase (B subunit)
PALES_37421	2163.872135	-1.199553712	0.214829796	-5.583739953	2.35E-08	1.27E-07	1.199553712	-2.296686136	sucA	2-oxoglutarate dehydrogenase E1 component	PA1585	sucA	2-oxoglutarate dehydrogenase (E1 subunit)
PALES_37411	765.9999229	-1.014668355	0.218273968	-4.648599947	3.34E-06	1.32E-05	1.014668355	-2.020438384	sucB	dihydrolipoamide succinyltransferase	PA1586	sucB	dihydrolipoamide succinyltransferase (E2 subunit)
PALES_37401	878.3766198	-1.683071322	0.231191604	-7.279984634	3.34E-13	3.02E-12	1.683071322	-3.211108298	lpdG	dihydrolipoamide dehydrogenase	PA1587	lpd	dihydrolipoamide dehydrogenase Lpd
PALES_37391	1670.560975	-1.686413712	0.205828096	-8.193311537	2.54E-16	3.13E-15	1.686413712	-3.218556316	sucC	succinyl-CoA synthetase subunit beta	PA1588	sucC	succinyl-CoA synthetase beta chain
PALES_37381	976.1427408	-1.83761188	0.246532147	-7.453842842	9.07E-14	8.71E-13	1.83761188	-3.574178979	sucD	succinyl-CoA synthetase subunit alpha	PA1589	sucD	succinyl-CoA synthetase alpha chain
PALES_37341	26.88980236	-1.086028314	0.378551539	-2.868904763	0.004118958	0.009075832	1.086028314	-2.12288808	PALES_37341	putative thioesterase	PA1593	PA1593	hypothetical protein
PALES_37331	13.61300873	-1.527786874	0.506585766	-3.015850382	0.002562597	0.00591512	1.527786874	-2.883431749	PALES_37331	putative thioesterase	PA1594	PA1594	hypothetical protein
PALES_37321	22.70583623	-1.049031479	0.408036566	-2.570925173	0.010142724	0.02026414	1.049031479	-2.069140311	PALES_37321	hypothetical protein	PA1595	PA1595	hypothetical protein
PALES_37311	2354.264284	1.555871559	0.212077305	7.336341614	2.20E-13	2.03E-12	1.555871559	2.940112907	htpG	heat shock protein 90	PA1596	htpG	heat shock protein HtpG
PALES_37301	46.39941324	1.348466653	0.330827133	4.076046121	4.58E-05	1.50E-04	1.348466653	2.546413398	PALES_37301	putative dienelactone hydrolase family protein	PA1597	PA1597	hypothetical protein
PALES_37231	88.841449	-1.015120073	0.26656586	-3.808139852	1.40E-04	4.17E-04	1.015120073	-2.021071097	PALES_37231	hypothetical protein	PA1604	PA1604	hypothetical protein
PALES_37191	126.2843309	2.077972392	0.256602693	8.098014751	5.59E-16	6.62E-15	2.077972392	4.222134074	PALES_37191	putative chemotaxis transducer	PA1608	PA1608	probable chemotaxis transducer
PALES_37181	1345.604649	-1.542397471	0.243951152	-6.322566866	2.57E-10	1.71E-09	1.542397471	-2.912781476	fabB	3-oxoacyl-(acyl carrier protein) synthase I	PA1609	fabB	beta-ketoacyl-ACP synthase I
PALES_37171	477.6024962	-1.161360474	0.249207649	-4.660211995	3.16E-06	1.25E-05	1.161360474	-2.236682493	fabA	3-hydroxydecanoyl-(acyl carrier protein) dehydratase	PA1610	fabA	beta-hydroxydecanoyl-ACP dehydrase
PALES_37141	74.03675424	-1.260302371	0.27698505	-4.550073633	5.36E-06	2.04E-05	1.260302371	-2.395459416	PALES_37141	putative outer membrane receptor protein	PA1613	PA1613	hypothetical protein
PALES_37001	33.83244605	1.293988189	0.404575198	3.19838733	0.001381985	0.003361299	1.293988189	2.452049645	PALES_37001	putative transcriptional regulator	PA1627	PA1627	probable transcriptional regulator
PALES_36971	38.31025196	2.468501246	0.399894064	6.172887942	6.71E-10	4.35E-09	2.468501246	5.534685136	PALES_36971	enoyl-CoA hydratase	PA1629	PA1629	probable enoyl-CoA hydratase/isomerase
PALES_36961	100.3051013	2.3803015	0.286321151	8.31339735	9.30E-17	1.19E-15	2.3803015	5.206455374	PALES_36961	putative transcriptional regulator	PA1630	PA1630	probable transcriptional regulator
PALES_36951	36.07316906	2.117038953	0.401940075	5.267051193	1.39E-07	6.71E-07	2.117038953	4.338026762	PALES_36951	putative acyl-CoA dehydrogenase	PA1631	PA1631	probable acyl-CoA dehydrogenase
PALES_36841	105.1204362	-0.829301209	0.243437852	-3.406623912	6.58E-04	0.00172311	0.829301209	-1.776824522	PALES_36841	tRNA 2-selenouridine synthase	PA1643	PA1643	conserved hypothetical protein
PALES_36811	19.40758072	2.217855078	0.496752002	4.46471291	8.02E-06	2.94E-05	2.217855078	4.652012836	PALES_36811	putative chemotaxis transducer	PA1646	PA1646	probable chemotaxis transducer
PALES_36771	89.43654173	2.082326808	0.313747974	6.636941047	3.20E-11	2.39E-10	2.082326808	4.234896784	PALES_36771	putative transporter	PA1650	PA1650	probable transporter
PALES_36761	124.7115933	3.149992793	0.331099959	9.513721495	1.84E-21	3.66E-20	3.149992793	8.876511435	PALES_36761	putative transporter	PA1651	PA1651	probable transporter
PALES_36741	11.64103312	1.462594235	0.578926247	2.526391304	0.011524104	0.022784664	1.462594235	2.756035049	PALES_36741	putative transcriptional regulator	PA1653	PA1653	probable transcriptional regulator
PALES_36731	68.82152719	1.069807844	0.282615073	3.785388484	1.53E-04	4.53E-04	1.069807844	2.099153758	PALES_36731	putative aminotransferase	PA1654	PA1654	probable aminotransferase
PALES_36721	133.669364	1.898450317	0.257061146	7.385209098	1.52E-13	1.44E-12	1.898450317	3.728125217	PALES_36721	putative glutathione S-transferase	PA1655	PA1655	probable glutathione S-transferase
PALES_36711	300.4701873	-2.374780833	0.225529045	-10.52982258	6.30E-26	1.89E-24	2.374780833	-5.186570243	PALES_36711	hypothetical protein	PA1656	hsiA2	HsiA2
PALES_36701	146.7179331	-3.108477918	0.278906584	-11.14522959	7.55E-29	2.83E-27	3.108477918	-8.62472178	PALES_36701	hypothetical protein	PA1657	hsiB2	HsiB2
PALES_36691	332.4398969	-2.93499474	0.235413653	-12.4673939	1.12E-35	7.23E-34	2.93499474	-7.64753466	PALES_36691	hypothetical protein	PA1658	hsiC2	HsiC2
PALES_36681	42.96674866	-2.739822987	0.358855495	-7.634892116	2.26E-14	2.30E-13	2.739822987	-6.67988371	PALES_36681	hypothetical protein	PA1659	hsiF2	HsiF2
PALES_36671	90.59072125	-2.770060407	0.286770324	-9.659508588	4.48E-22	9.43E-21	2.770060407	-6.821364746	PALES_36671	hypothetical protein	PA1660	hsiG2	HsiG2
PALES_36661	25.76229908	-2.313821061	0.440558039	-5.252023245	1.50E-07	7.23E-07	2.313821061	-4.971981956	PALES_36661	hypothetical protein	PA1661	hsiH2	HsiH2
PALES_36651	144.6209529	-3.046057705	0.25270968	-12.05358536	1.86E-33	1.03E-31	3.046057705	-8.259518641	PALES_36651	putative ClpA/B-type protease	PA1662	clpV2	clpV2
PALES_36641	55.36999049	-3.092117004	0.345841917	-8.940839314	3.86E-19	6.20E-18	3.092117004	-8.527465447	PALES_36641	putative transcriptional regulator	PA1663	sfa2	Sfa2
PALES_36621	59.10383375	-3.298924998	0.370413528	-8.906059714	5.29E-19	8.41E-18	3.298924998	-9.841819097	PALES_36621	hypothetical protein	PA1665	fha2	Fha2
PALES_36611	21.43643519	-3.515032396	0.520706282	-6.750508906	1.47E-11	1.14E-10	3.515032396	-11.43220983	PALES_36611	putative lipoprotein	PA1666	lip2	Lip2
PALES_36601	48.41460309	-2.382908458	0.339046679	-7.028260722	2.09E-12	1.74E-11	2.382908458	-5.215871972	PALES_36601	hypothetical protein	PA1667	hsiJ2	HsiJ2
PALES_36591	49.38907653	-2.057611407	0.367743046	-5.595242187	2.20E-08	1.20E-07	2.057611407	-4.162964935	PALES_36591	putative outer membrane protein	PA1668	dotU2	DotU2
PALES_36581	83.73230814	-2.490383148	0.308911644	-8.061797583	7.52E-16	8.83E-15	2.490383148	-5.619271659	PALES_36581	hypothetical protein	PA1669	icmF2	IcmF2
PALES_36571	14.36347513	-1.631907225	0.497159687	-3.282460882	0.001029053	0.002582135	1.631907225	-3.099224416	stp1	serine/threonine phosphoprotein phosphatase Stp1	PA1670	stp1	Stp1
PALES_36561	14.62725221	-1.929744957	0.538474355	-3.583726762	3.39E-04	9.42E-04	1.929744957	-3.809878414	stk1	serine-threonine kinase Stk1	PA1671	stk1	Stk1
PALES_36551	86.55172959	0.751166977	0.261495671	2.872579021	0.004071362	0.00897928	0.751166977	1.683153761	PALES_36551	putative enzyme	PA1672	PA1672	hypothetical protein
PALES_36541	299.6159333	-4.61034629	0.323550324	-14.24924023	4.53E-46	6.34E-44	4.61034629	-24.42600962	PALES_36541	hypothetical protein	PA1673	PA1673	hypothetical protein
PALES_36531	119.7008243	-0.818209854	0.242533256	-3.373598608	7.42E-04	0.001914425	0.818209854	-1.763216774	folE	GTP cyclohydrolase I	PA1674	folE2	GTP cyclohydrolase I precursor
PALES_36481	179.6888859	1.984465094	0.263011394	7.545167783	4.52E-14	4.46E-13	1.984465094	3.957159164	PALES_36481	hypothetical protein	PA1679	PA1679	hypothetical protein
PALES_36441	40.33162767	-1.004354502	0.329155956	-3.051302834	0.002278506	0.005297945	1.004354502	-2.006045741	PALES_36441	methylthioribulose-1-phosphate dehydratase	PA1683	PA1683	probable sugar aldolase
PALES_36431	105.2892229	-0.704973667	0.251288772	-2.805432419	0.005024912	0.010840951	0.704973667	-1.630114911	PALES_36431	putative oxidase	PA1684	PA1684	1,2-dihydroxy-3-keto-5-methylthiopentene dioxygenase MtnD
PALES_36421	41.26356658	-0.947172622	0.319525153	-2.964313174	0.003033594	0.006872196	0.947172622	-1.928090302	masA	enolase-phosphatase E-1	PA1685	masA	enolase-phosphatase E-1
PALES_36401	37.42966208	1.227970584	0.352653094	3.482092189	4.98E-04	0.001332773	1.227970584	2.342372602	alkA	DNA-3-methyladenine glycosidase II	PA1686	alkA	DNA-3-methyladenine glycosidase II
PALES_36391	71.0037705	-1.109704767	0.290065872	-3.82569918	1.30E-04	3.90E-04	1.109704767	-2.158014812	speE	spermidine synthase	PA1687	speE	spermidine synthase
PALES_36381	67.25856219	-1.021905979	0.302159056	-3.382013412	7.20E-04	0.001865615	1.021905979	-2.030599863	PALES_36381	hypothetical protein	PA1688	PA1688	hypothetical protein
PALES_36371	161.2598276	-1.529848386	0.230872695	-6.626372117	3.44E-11	2.55E-10	1.529848386	-2.88755492	PALES_36371	hypothetical protein	PA1689	PA1689	conserved hypothetical protein
PALES_36211	23.27741707	1.16398209	0.418262132	2.782900963	0.005387525	0.011513564	1.16398209	2.240750611	pcrV	type III secretion protein PcrV	PA1706	pcrV	type III secretion protein PcrV
PALES_36161	112.6076402	-0.953561575	0.295392769	-3.228114141	0.001246092	0.003058941	0.953561575	-1.936647755	exsA	transcriptional regulator ExsA	PA1713	exsA	transcriptional regulator ExsA
PALES_36031	112.4076825	-1.348991181	0.244583118	-5.515471364	3.48E-08	1.83E-07	1.348991181	-2.54733938	bglX	periplasmic beta-glucosidase	PA1726	bglX	periplasmic beta-glucosidase
PALES_36011	772.8098078	2.08014744	0.208206014	9.990813441	1.67E-23	3.98E-22	2.08014744	4.228504282	PALES_36011	hypothetical protein	PA1728	PA1728	hypothetical protein
PALES_36001	281.7942271	2.186981793	0.268768232	8.137054663	4.05E-16	4.86E-15	2.186981793	4.553518651	PALES_36001	hypothetical protein	PA1729	PA1729	conserved hypothetical protein
PALES_35991	674.4001415	2.469683919	0.263391416	9.376478402	6.82E-21	1.28E-19	2.469683919	5.539224148	PALES_35991	hypothetical protein	PA1730	PA1730	conserved hypothetical protein
PALES_35981	198.1744348	2.521712664	0.265594941	9.494580938	2.21E-21	4.38E-20	2.521712664	5.74263419	PALES_35981	hypothetical protein	PA1731	PA1731	conserved hypothetical protein
PALES_35971	185.7973869	2.354152754	0.264669882	8.894675642	5.86E-19	9.29E-18	2.354152754	5.112938789	PALES_35971	putative transglutaminase-like domain protein	PA1732	PA1732	conserved hypothetical protein
PALES_35961	328.9834696	1.727127735	0.256303862	6.738594265	1.60E-11	1.23E-10	1.727127735	3.310680376	PALES_35961	putative proteasome-type protease	PA1733	PA1733	conserved hypothetical protein
PALES_35951	36.0714911	1.001026268	0.350069502	2.859507223	0.004242998	0.009318916	1.001026268	2.001423216	PALES_35951	putative cytochrome c protein	PA1734	PA1734	hypothetical protein
PALES_35941	6.596128658	2.832963847	0.905927	3.127143631	0.001765137	0.004202917	2.832963847	7.125364647	PALES_35941	putative permease	PA1735	PA1735	hypothetical protein
PALES_35931	40.27480486	-1.8397456	0.360987218	-5.096428651	3.46E-07	1.57E-06	1.8397456	-3.579469037	PALES_35931	acetyl-CoA acetyltransferase	PA1736	PA1736	probable acyl-CoA thiolase
PALES_35921	87.91038501	-1.71766659	0.259777079	-6.612079086	3.79E-11	2.79E-10	1.71766659	-3.289040082	PALES_35921	putative 3-hydroxyacyl-CoA dehydrogenase	PA1737	PA1737	probable 3-hydroxyacyl-CoA dehydrogenase
PALES_35911	121.7746362	1.127828402	0.250077174	4.509921422	6.49E-06	2.42E-05	1.127828402	2.185295538	PALES_35911	putative transcriptional regulator	PA1738	PA1738	probable transcriptional regulator
PALES_35901	13.90943434	1.731820848	0.535530209	3.233843432	0.001221364	0.003009112	1.731820848	3.321467615	PALES_35901	putative oxidoreductase	PA1739	PA1739	probable oxidoreductase
PALES_35871	317.7803647	1.806553492	0.231552769	7.801908379	6.10E-15	6.68E-14	1.806553492	3.498056259	PALES_35871	amidotransferase	PA1742	pauD2	Glutamine amidotransferase class I
PALES_35851	17.18047992	1.79710239	0.53227358	3.376275766	7.35E-04	0.00189875	1.79710239	3.475215372	PALES_35851	hypothetical protein	PA1744	PA1744	hypothetical protein
PALES_35841	192.6437763	0.998649973	0.256853002	3.888021424	1.01E-04	3.11E-04	0.998649973	1.99812934	PALES_35841	hypothetical protein	PA1745	PA1745	hypothetical protein
PALES_35831	455.1313029	-4.542764177	0.248366318	-18.29058068	9.84E-75	5.85E-72	4.542764177	-23.30817555	PALES_35831	hypothetical protein	PA1746	PA1746	hypothetical protein
PALES_35821	35.78743081	2.241216626	0.420189819	5.333819436	9.62E-08	4.76E-07	2.241216626	4.727956054	PALES_35821	hypothetical protein	PA1747	PA1747	hypothetical protein
PALES_35811	49.83628182	-1.458451185	0.309345234	-4.71463926	2.42E-06	9.78E-06	1.458451185	-2.748131776	PALES_35811	enoyl-CoA hydratase	PA1748	PA1748	probable enoyl-CoA hydratase/isomerase
PALES_35791	382.3846637	-0.972168301	0.252928365	-3.843650757	1.21E-04	3.65E-04	0.972168301	-1.961786852	PALES_35791	phospho-2-dehydro-3-deoxyheptonate aldolase	PA1750	PA1750	phospho-2-dehydro-3-deoxyheptonate aldolase
PALES_35761	217.4640539	1.668958203	0.234998646	7.101990708	1.23E-12	1.05E-11	1.668958203	3.179848879	PALES_35761	universal stress protein	PA1753	PA1753	conserved hypothetical protein
PALES_35751	678.3690144	0.81154765	0.18861755	4.30260944	1.69E-05	5.91E-05	0.81154765	1.755093208	cysB	transcriptional regulator CysB	PA1754	cysB	transcriptional regulator CysB
PALES_35731	92.7528718	-1.1398522	0.261625645	-4.35680608	1.32E-05	4.70E-05	1.1398522	-2.20358447	cysH	phosphoadenosine phosphosulfate reductase	PA1756	cysH	3'-phosphoadenosine-5'-phosphosulfate reductase
PALES_35721	50.16226588	-1.318851656	0.336682488	-3.91719707	8.96E-05	2.78E-04	1.318851656	-2.494674618	thrH	phosphoserine phosphatase	PA1757	thrH	homoserine kinase
PALES_35701	359.7911402	1.672072807	0.221232638	7.557984317	4.09E-14	4.06E-13	1.672072807	3.186721201	PALES_35701	putative transcriptional regulator	PA1759	PA1759	probable transcriptional regulator
PALES_35691	259.0973784	1.782442246	0.218592843	8.15416563	3.52E-16	4.25E-15	1.782442246	3.440080312	PALES_35691	putative transcriptional regulator	PA1760	PA1760	probable transcriptional regulator
PALES_35681	176.7689556	2.40423167	0.258408102	9.304010396	1.35E-20	2.48E-19	2.40423167	5.293535736	PALES_35681	hypothetical protein	PA1761	PA1761	hypothetical protein
PALES_35671	91.52867052	2.389288952	0.304329155	7.851002485	4.13E-15	4.61E-14	2.389288952	5.238990887	PALES_35671	putative peptidase	PA1762	PA1762	hypothetical protein
PALES_35661	55.3014655	2.03381216	0.348139009	5.841954235	5.16E-09	3.02E-08	2.03381216	4.094854414	PALES_35661	hypothetical protein	PA1763	PA1763	hypothetical protein
PALES_35651	18.99607326	2.192549252	0.498193244	4.401001572	1.08E-05	3.88E-05	2.192549252	4.57112494	PALES_35651	putative outer membrane protein transport protein	PA1764	PA1764	hypothetical protein
PALES_35631	239.6274124	-1.428570452	0.214296461	-6.666327786	2.62E-11	1.97E-10	1.428570452	-2.691798563	PALES_35631	hypothetical protein	PA1766	PA1766	hypothetical protein
PALES_35621	223.6238944	-1.53256302	0.220276363	-6.95745562	3.46E-12	2.80E-11	1.53256302	-2.892993376	PALES_35621	putative membrain protein	PA1767	PA1767	hypothetical protein
PALES_35611	300.9156254	-1.163434933	0.299311713	-3.887034427	1.01E-04	3.12E-04	1.163434933	-2.239900945	PALES_35611	hypothetical protein	PA1768	PA1768	hypothetical protein
PALES_35591	1177.122752	-0.991433125	0.197058053	-5.031172847	4.87E-07	2.16E-06	0.991433125	-1.988158981	ppsA	phosphoenolpyruvate synthase	PA1770	ppsA	phosphoenolpyruvate synthase
PALES_35581	46.52066716	-1.146032075	0.351371127	-3.261600024	0.001107853	0.002758033	1.146032075	-2.213043908	estX	EstX	PA1771	estX	EstX
PALES_35531	2300.11109	-1.034603111	0.280291263	-3.691171461	2.23E-04	6.40E-04	1.034603111	-2.048550007	sigX	RNA polymerase sigma factor SigX	PA1776	sigX	ECF sigma factor SigX
PALES_35521	31255.99038	-1.102065991	0.180355988	-6.110504015	9.93E-10	6.31E-09	1.102065991	-2.146618761	oprF	Major porin and structural outer membrane porin OprF precursor	PA1777	oprF	Major porin and structural outer membrane porin OprF precursor
PALES_35511	73.05979652	4.665509542	0.474988194	9.822369478	9.02E-23	2.02E-21	4.665509542	25.378054	cobA	uroporphyrin-III C-methyltransferase	PA1778	cobA	uroporphyrin-III C-methyltransferase
PALES_35501	135.3637279	4.368054755	0.35644941	12.25434698	1.59E-34	9.35E-33	4.368054755	20.64978356	PALES_35501	assimilatory nitrate reductase	PA1779	PA1779	assimilatory nitrate reductase
PALES_35491	16.66231643	4.243069963	0.817525689	5.190136558	2.10E-07	9.87E-07	4.243069963	18.93613463	nirD	assimilatory nitrite reductase small subunit	PA1780	nirD	assimilatory nitrite reductase small subunit
PALES_35481	218.514345	5.864271565	0.425231417	13.79077682	2.90E-43	3.13E-41	5.864271565	58.25344903	nirB	assimilatory nitrite reductase large subunit	PA1781	nirB	assimilatory nitrite reductase large subunit
PALES_35471	76.77288011	5.058093989	0.512492584	9.869594496	5.64E-23	1.29E-21	5.058093989	33.31486146	PALES_35471	putative serine/threonine-protein kinase	PA1782	PA1782	probable serine/threonine-protein kinase
PALES_35461	89.72870249	6.157349184	0.639768938	9.624332815	6.31E-22	1.29E-20	6.157349184	71.37511123	nasA	nitrate transporter	PA1783	nasA	nitrate transporter
PALES_35451	833.9697137	1.126224889	0.229555147	4.906119098	9.29E-07	3.95E-06	1.126224889	2.182867996	PALES_35451	putative lyase	PA1784	PA1784	hypothetical protein
PALES_35441	71.33561529	6.121030995	0.705761925	8.672940231	4.21E-18	6.20E-17	6.121030995	69.60075231	nasT	response regulator NasT	PA1785	nasT	NasT
PALES_35431	279.5990255	6.81293771	0.479744705	14.20117333	9.01E-46	1.22E-43	6.81293771	112.4342453	nasS	nitrate-binding protein NasS	PA1786	nasS	NasS
PALES_35421	1638.162365	-1.534060459	0.234250537	-6.548802319	5.80E-11	4.20E-10	1.534060459	-2.895997705	acnB	bifunctional aconitate hydratase 2/2-methylisocitrate dehydratase	PA1787	acnB	aconitate hydratase 2
PALES_35401	1386.080526	-2.002035325	0.263494972	-7.598002004	3.01E-14	3.04E-13	2.002035325	-4.005647102	PALES_35401	putative universal stress protein	PA1789	PA1789	hypothetical protein
PALES_35391	28.68351651	-1.509027193	0.376761875	-4.005254491	6.20E-05	1.98E-04	1.509027193	-2.846180569	PALES_35391	putative tRNA-(ms(2)io(6)a)-hydroxylase	PA1790	PA1790	hypothetical protein
PALES_35381	67.40469824	-3.074281955	0.349788513	-8.788973446	1.51E-18	2.29E-17	3.074281955	-8.422695177	PALES_35381	hypothetical protein	PA1791	PA1791	hypothetical protein
PALES_35371	48.18044613	-0.70260278	0.309176615	-2.272496513	0.023056538	0.042280694	0.70260278	-1.627438222	PALES_35371	UDP-2,3-diacylglucosamine hydrolase	PA1792	PA1792	conserved hypothetical protein
PALES_35361	730.7938029	-0.87245397	0.24091316	-3.621445876	2.93E-04	8.23E-04	0.87245397	-1.830774331	ppiB	peptidyl-prolyl cis-trans isomerase B	PA1793	ppiB	peptidyl-prolyl cis-trans isomerase B
PALES_35351	452.0195224	-1.213692503	0.211880351	-5.728197521	1.02E-08	5.76E-08	1.213692503	-2.319304918	glnS	glutaminyl-tRNA synthetase	PA1794	glnS	glutaminyl-tRNA synthetase
PALES_35341	301.2690883	-1.088727811	0.200856272	-5.420432246	5.95E-08	3.03E-07	1.088727811	-2.126864039	cysS	cysteinyl-tRNA synthetase	PA1795	cysS	cysteinyl-tRNA synthetase
PALES_35331	210.3817763	-1.331463519	0.241413226	-5.515288201	3.48E-08	1.83E-07	1.331463519	-2.516578358	folD	5,10-methylene-tetrahydrofolate dehydrogenase / cyclohydrolase	PA1796	folD	5,10-methylene-tetrahydrofolate dehydrogenase / cyclohydrolase
PALES_35311	30.24871935	1.380943125	0.381347796	3.62121701	2.93E-04	8.23E-04	1.380943125	2.604385705	PALES_35311	putative beta-lactamase	PA1797	PA1797	hypothetical protein
PALES_35271	1043.536844	-2.258602971	0.187980131	-12.0151154	2.96E-33	1.58E-31	2.258602971	-4.785278767	tig	trigger factor	PA1800	tig	trigger factor
PALES_35251	4901.177288	1.049259701	0.214691985	4.887279327	1.02E-06	4.32E-06	1.049259701	2.069467657	clpX	ATP-dependent protease ATP-binding subunit ClpX	PA1802	clpX	ClpX
PALES_35241	2588.839766	1.731073384	0.20524746	8.434079459	3.34E-17	4.38E-16	1.731073384	3.319747201	lon	Lon protease	PA1803	lon	Lon protease
PALES_35231	1996.444209	-0.614458565	0.192644907	-3.189591531	0.00142474	0.003454393	0.614458565	-1.53098332	hupB	DNA-binding protein HU	PA1804	hupB	DNA-binding protein HU
PALES_35221	557.527872	-0.957153697	0.201731475	-4.74469191	2.09E-06	8.56E-06	0.957153697	-1.941475763	ppiD	peptidyl-prolyl cis-trans isomerase D	PA1805	ppiD	peptidyl-prolyl cis-trans isomerase D
PALES_35211	39.07928161	-1.6572348	0.331111263	-5.005069253	5.58E-07	2.45E-06	1.6572348	-3.154113989	fabI	NADH-dependent enoyl-ACP reductase	PA1806	fabI	NADH-dependent enoyl-ACP reductase
PALES_35201	66.26421983	-0.823376228	0.274826728	-2.995983084	0.002735616	0.006276681	0.823376228	-1.769542274	PALES_35201	putative ATP-binding component of ABC transporter	PA1807	nppD	NppD
PALES_35151	481.9774738	-1.501495153	0.236972309	-6.336162896	2.36E-10	1.58E-09	1.501495153	-2.831359916	mltD	membrane-bound lytic murein transglycosylase D precursor	PA1812	mltD	membrane-bound lytic murein transglycosylase D precursor
PALES_35141	103.2455623	0.633193222	0.247963265	2.553576725	0.010662278	0.021230793	0.633193222	1.550994126	PALES_35141	putative hydroxyacylglutathione hydrolase	PA1813	PA1813	probable hydroxyacylglutathione hydrolase
PALES_35131	94.15542314	0.871171866	0.257191251	3.387253116	7.06E-04	0.001834503	0.871171866	1.829148069	PALES_35131	hypothetical protein	PA1814	kerV	KerV
PALES_35101	28.1549433	1.131480272	0.401291544	2.819596598	0.004808406	0.010442737	1.131480272	2.190834147	PALES_35101	hypothetical protein	PA1817	PA1817	hypothetical protein
PALES_35061	209.0903477	-0.59275324	0.219189271	-2.704298611	0.006844875	0.01428143	0.59275324	-1.508122104	PALES_35061	enoyl-CoA hydratase	PA1821	PA1821	probable enoyl-CoA hydratase/isomerase
PALES_35011	27.31377017	1.040682632	0.405542292	2.566150689	0.010283414	0.020536596	1.040682632	2.057200817	PALES_35011	putative transcriptional regulator	PA1826	PA1826	probable transcriptional regulator
PALES_34991	72.42616191	-0.65904008	0.267395583	-2.4646633	0.013714206	0.026671185	0.65904008	-1.57903164	PALES_34991	short chain dehydrogenase	PA1828	PA1828	probable short-chain dehydrogenase
PALES_34971	422.7902905	-2.164177979	0.211999866	-10.20839316	1.82E-24	4.86E-23	2.164177979	-4.482109762	PALES_34971	putative sterol carrier protein	PA1830	PA1830	hypothetical protein
PALES_34961	94.22453252	-0.845383297	0.292358951	-2.891593685	0.003832933	0.008496781	0.845383297	-1.796742043	PALES_34961	putative phosphoglycerate mutase	PA1831	PA1831	hypothetical protein
PALES_34951	385.1324592	0.952520352	0.21108631	4.512468632	6.41E-06	2.40E-05	0.952520352	1.935250541	PALES_34951	putative periplasmic protease	PA1832	PA1832	probable protease
PALES_34901	90.43960872	-1.697752443	0.261947371	-6.481273085	9.10E-11	6.45E-10	1.697752443	-3.243951933	PALES_34901	hypothetical protein	PA1837	PA1837	hypothetical protein
PALES_34891	385.9239192	-1.522088225	0.214925117	-7.081946708	1.42E-12	1.20E-11	1.522088225	-2.872064651	cysI	sulfite reductase	PA1838	cysI	sulfite reductase
PALES_34861	30.86610792	-1.138373875	0.35085331	-3.244586392	0.001176213	0.002916003	1.138373875	-2.20132762	PALES_34861	putative Fe-S-cluster redox enzyme	PA1839	PA1839	hypothetical protein
PALES_34831	72.72293542	1.222806907	0.296381817	4.125782481	3.69E-05	1.23E-04	1.222806907	2.334003795	PALES_34831	hypothetical protein	PA1842	PA1842	hypothetical protein
PALES_34821	787.2742524	0.890018232	0.243544017	3.654445076	2.58E-04	7.32E-04	0.890018232	1.853199543	metH	B12-dependent methionine synthase	PA1843	metH	methionine synthase
PALES_34811	18.33301162	-1.116339932	0.428108307	-2.607611006	0.00911765	0.018386101	1.116339932	-2.167962695	PALES_34811	hypothetical protein	PA1844	tse1	Tse1
PALES_34801	85.01859719	-1.265258945	0.276383825	-4.577905183	4.70E-06	1.80E-05	1.265258945	-2.403703493	PALES_34801	hypothetical protein	PA1845	tsi1	Tsi1
PALES_34791	121.0194352	-0.88457005	0.263890191	-3.352038381	8.02E-04	0.002055177	0.88457005	-1.846214333	cti	cis/trans isomerase	PA1846	cti	cis/trans isomerase
PALES_34781	749.1180478	1.068905317	0.234098172	4.566055805	4.97E-06	1.90E-05	1.068905317	2.097840971	PALES_34781	hypothetical protein	PA1847	nfuA	NfuA
PALES_34731	21.41420175	1.869913588	0.478791253	3.905488196	9.40E-05	2.91E-04	1.869913588	3.655106868	PALES_34731	putative two-component response regulator	PA1851	PA1851	hypothetical protein
PALES_34721	553.8688132	-1.144742084	0.198590148	-5.764344801	8.20E-09	4.69E-08	1.144742084	-2.211065991	PALES_34721	hypothetical protein	PA1852	PA1852	hypothetical protein
PALES_34671	79.08681217	-1.110173559	0.263371367	-4.21524014	2.50E-05	8.53E-05	1.110173559	-2.158716155	PALES_34671	hypothetical protein	PA1857	PA1857	conserved hypothetical protein
PALES_34641	173.299219	1.745008073	0.278058594	6.275684737	3.48E-10	2.29E-09	1.745008073	3.351967296	PALES_34641	putative O-Methyltransferase	PA1860	PA1860	hypothetical protein
PALES_34631	26.37534121	1.24484304	0.416736839	2.987120225	0.002816189	0.006441068	1.24484304	2.369927689	modC	molybdenum transport protein ModC	PA1861	modC	molybdenum transport protein ModC
PALES_34611	82.27061407	2.553657153	0.306396972	8.334472559	7.78E-17	1.00E-15	2.553657153	5.871207125	modA	molybdate-binding periplasmic protein precursor ModA	PA1863	modA	molybdate-binding periplasmic protein precursor ModA
PALES_34601	16.80854847	2.696220448	0.5777833	4.666490794	3.06E-06	1.22E-05	2.696220448	6.481018033	PALES_34601	putative transcriptional regulator	PA1864	PA1864	probable transcriptional regulator
PALES_34591	56.03443404	1.439445125	0.349686766	4.116384337	3.85E-05	1.27E-04	1.439445125	2.712165328	PALES_34591	hypothetical protein	PA1865	PA1865	hypothetical protein
PALES_34581	50.43914271	0.98205253	0.321109096	3.058314266	0.00222586	0.005190763	0.98205253	1.975273644	PALES_34581	putative DNA helicase	PA1866	PA1866	hypothetical protein
PALES_34541	201.5005629	-2.127238202	0.246081395	-8.644449525	5.41E-18	7.79E-17	2.127238202	-4.368803453	PALES_34541	putative acyl carrier protein	PA1869	acp1	Acp1
PALES_34531	52.02485159	1.075497404	0.331585272	3.243501728	0.001180701	0.00292408	1.075497404	2.10744854	PALES_34531	hypothetical protein	PA1870	PA1870	hypothetical protein
PALES_34521	629.9851692	-2.859241507	0.284780813	-10.04014799	1.02E-23	2.46E-22	2.859241507	-7.256337238	lasA	LasA protease precursor	PA1871	lasA	LasA protease precursor
PALES_34511	41.67810287	0.852444862	0.326613541	2.60994954	0.009055558	0.018284152	0.852444862	1.805558121	PALES_34511	hypothetical protein	PA1872	PA1872	hypothetical protein
PALES_34491	4770.900476	-0.9797763	0.196586336	-4.983949141	6.23E-07	2.72E-06	0.9797763	-1.972159589	PALES_34491	hypothetical protein	PA1874	PA1874	hypothetical protein
PALES_34441	14.58145839	2.097024422	0.56021146	3.743272982	1.82E-04	5.32E-04	2.097024422	4.278260773	PALES_34441	putative transcriptional regulator	PA1879	PA1879	hypothetical protein
PALES_34431	295.345598	1.046320061	0.249889355	4.187133378	2.82E-05	9.59E-05	1.046320061	2.065255195	PALES_34431	putative oxidoreductase	PA1880	PA1880	probable oxidoreductase
PALES_34421	129.4248575	1.01547644	0.26319942	3.858201671	1.14E-04	3.47E-04	1.01547644	2.021570393	PALES_34421	putative oxidoreductase	PA1881	PA1881	probable oxidoreductase
PALES_34411	15.01163015	2.5130361	0.593129215	4.236911685	2.27E-05	7.79E-05	2.5130361	5.708200857	PALES_34411	putative transporter	PA1882	PA1882	probable transporter
PALES_34391	13.90071978	1.927863662	0.558314807	3.453004718	5.54E-04	0.001468565	1.927863662	3.804913514	PALES_34391	putative transcriptional regulator	PA1884	PA1884	probable transcriptional regulator
PALES_34381	41.21666904	2.333034826	0.381995947	6.107485806	1.01E-09	6.42E-09	2.333034826	5.038641548	PALES_34381	putative acetyltransferase	PA1885	PA1885	conserved hypothetical protein
PALES_34321	27.60994716	-1.521658527	0.412836692	-3.68586067	2.28E-04	6.52E-04	1.521658527	-2.871209351	PALES_34321	hypothetical protein	PA1892	PA1892	hypothetical protein
PALES_34311	104.6430738	-2.150837229	0.279649598	-7.691186562	1.46E-14	1.51E-13	2.150837229	-4.440854269	PALES_34311	putative penicillin acylase	PA1893	PA1893	hypothetical protein
PALES_34301	220.4792561	-2.56260557	0.243716254	-10.51470933	7.39E-26	2.21E-24	2.56260557	-5.907736868	PALES_34301	putative enzyme	PA1894	PA1894	hypothetical protein
PALES_34291	172.3251551	-2.046044136	0.266486457	-7.677854112	1.62E-14	1.67E-13	2.046044136	-4.129720479	PALES_34291	hypothetical protein	PA1895	PA1895	hypothetical protein
PALES_34281	95.03048194	-2.444650715	0.269158439	-9.08257129	1.06E-19	1.78E-18	2.444650715	-5.443938295	PALES_34281	hypothetical protein	PA1896	PA1896	hypothetical protein
PALES_34271	220.8012003	-1.906402588	0.231894173	-8.221002571	2.02E-16	2.51E-15	1.906402588	-3.748731736	PALES_34271	putative desaturase	PA1897	PA1897	hypothetical protein
PALES_34251	178.1873566	-1.744343587	0.247271953	-7.054352784	1.73E-12	1.46E-11	1.744343587	-3.350423779	phzA2	putative phenazine biosynthesis protein	PA1899	phzA2	probable phenazine biosynthesis protein
PALES_34171	11.77770289	2.444017472	0.639072052	3.824322256	1.31E-04	3.92E-04	2.444017472	5.44154931	PALES_34171	putative dienelactone hydrolase	PA1907	PA1907	hypothetical protein
PALES_34161	13.27001926	3.3385835	0.724859806	4.605833394	4.11E-06	1.59E-05	3.3385835	10.11611544	PALES_34161	putative major facilitator superfamily (MFS) transporter	PA1908	PA1908	probable major facilitator superfamily (MFS) transporter
PALES_34151	15.38735873	3.302065763	0.668810506	4.937221729	7.92E-07	3.41E-06	3.302065763	9.863268194	PALES_34151	hypothetical protein	PA1909	PA1909	hypothetical protein
PALES_34141	72.1194401	3.695895256	0.40081128	9.22103604	2.94E-20	5.18E-19	3.695895256	12.95911467	femA	ferric-mycobactin receptor, FemA	PA1910	femA	ferric-mycobactin receptor, FemA
PALES_34131	57.80182602	3.270697949	0.420710408	7.774226367	7.59E-15	8.15E-14	3.270697949	9.651130532	femR	sigma factor regulator, FemR	PA1911	femR	sigma factor regulator, FemR
PALES_34121	73.986981	3.642329286	0.394438859	9.234205002	2.60E-20	4.65E-19	3.642329286	12.48677738	femI	ECF sigma factor, FemI	PA1912	femI	ECF sigma factor, FemI
PALES_34111	30.18451854	-1.315071588	0.388244035	-3.387229344	7.06E-04	0.001834503	1.315071588	-2.488146768	PALES_34111	hypothetical protein	PA1913	PA1913	hypothetical protein
PALES_34101	895.8386916	-1.944227039	0.198950965	-9.772393098	1.48E-22	3.24E-21	1.944227039	-3.848315385	PALES_34101	putative halovibrin	PA1914	PA1914	conserved hypothetical protein
PALES_34081	110.6636209	1.286828512	0.254261321	5.061047066	4.17E-07	1.86E-06	1.286828512	2.43991098	PALES_34081	putative regulatory protein	PA1915	PA1915	hypothetical protein
PALES_34041	27.49831326	-3.752666251	0.500949609	-7.491105259	6.83E-14	6.60E-13	3.752666251	-13.47923066	PALES_34041	putative radical-activating enzyme	PA1919	nrdG	class III (anaerobic) ribonucleoside-triphosphate reductase activating protein, 'activase', NrdG
PALES_34031	50.95185512	-2.948140843	0.34908943	-8.445230904	3.03E-17	4.00E-16	2.948140843	-7.717538863	PALES_34031	anaerobic ribonucleoside triphosphate reductase	PA1920	nrdD	class III (anaerobic) ribonucleoside-triphosphate reductase subunit, NrdD
PALES_33971	82.87014949	-0.814016473	0.29937791	-2.719026507	0.006547436	0.01374528	0.814016473	-1.758099196	PALES_33971	hypothetical protein	PA1926	PA1926	Uncharacterized protein
PALES_33961	785.1904572	3.418194568	0.244642831	13.97218368	2.30E-44	2.74E-42	3.418194568	10.69003423	metE	5-methyltetrahydropteroyltriglutamate-- homocysteine S-methyltransferase	PA1927	metE	5-methyltetrahydropteroyltriglutamate-homocysteine S-methyltransferase
PALES_33931	1300.329848	1.967622623	0.208378963	9.442520465	3.64E-21	7.01E-20	1.967622623	3.911230669	PALES_33931	putative chemotaxis transducer	PA1930	PA1930	probable chemotaxis transducer
PALES_33921	106.712247	2.515975696	0.324740696	7.747645194	9.36E-15	9.91E-14	2.515975696	5.719843587	PALES_33921	putative ferredoxin	PA1931	PA1931	probable ferredoxin
PALES_33911	52.93294035	1.566827044	0.347049745	4.514704498	6.34E-06	2.37E-05	1.566827044	2.962524416	PALES_33911	putative hydroxylase molybdopterin-containing subunit	PA1932	PA1932	probable hydroxylase molybdopterin-containing subunit
PALES_33901	98.09428193	1.450683479	0.262595844	5.524396176	3.31E-08	1.74E-07	1.450683479	2.733375147	PALES_33901	putative hydroxylase large subunit	PA1933	PA1933	probable hydroxylase large subunit
PALES_33831	28.99907937	-2.210860414	0.394537602	-5.603674784	2.10E-08	1.15E-07	2.210860414	-4.629512925	PALES_33831	hypothetical protein	PA1940	PA1940	hypothetical protein
PALES_33821	99.33783609	-2.052887741	0.274465427	-7.479585915	7.46E-14	7.18E-13	2.052887741	-4.149356863	PALES_33821	hypothetical protein	PA1941	PA1941	hypothetical protein
PALES_33811	23.73338218	1.024819971	0.416672961	2.459530773	0.013911877	0.027011423	1.024819971	2.034705464	PALES_33811	hypothetical protein	PA1942	PA1942	hypothetical protein
PALES_33801	146.2205621	1.236106596	0.235445258	5.250080658	1.52E-07	7.30E-07	1.236106596	2.355619621	PALES_33801	putative acetyltransferase	PA1943	PA1943	hypothetical protein
PALES_33791	225.5820625	1.029290609	0.22271659	4.621526445	3.81E-06	1.49E-05	1.029290609	2.041020409	PALES_33791	ribosomal protein S6 modification enzyme	PA1944	PA1944	hypothetical protein
PALES_33781	59.80284857	1.945203075	0.371003557	5.243084698	1.58E-07	7.56E-07	1.945203075	3.850919792	PALES_33781	putative transcriptional regulator	PA1945	PA1945	probable transcriptional regulator
PALES_33771	288.9343869	1.212382631	0.218242883	5.555198928	2.77E-08	1.48E-07	1.212382631	2.317200098	rbsB	binding protein component precursor of ABC ribose transporter	PA1946	rbsB	binding protein component precursor of ABC ribose transporter
PALES_33761	57.60227498	0.824477658	0.326092387	2.528356048	0.011459807	0.022676397	0.824477658	1.770893753	rbsA	ribose transport protein RbsA	PA1947	rbsA	ribose transport protein RbsA
PALES_33721	191.337296	0.997927262	0.264076918	3.77892649	1.58E-04	4.63E-04	0.997927262	1.997128639	PALES_33721	hypothetical protein	PA1951	fapF	FapF
PALES_33641	46.19716719	-2.36648852	0.345133721	-6.856729368	7.05E-12	5.56E-11	2.36648852	-5.156844419	bacA	undecaprenyl pyrophosphate phosphatase	PA1959	bacA	bacitracin resistance protein
PALES_33601	72.32385944	1.144017863	0.31313993	3.653375861	2.59E-04	7.35E-04	1.144017863	2.209956333	PALES_33601	hypothetical protein	PA1963	PA1963	hypothetical protein
PALES_33551	121.2058986	2.257774348	0.323616827	6.976690216	3.02E-12	2.48E-11	2.257774348	4.782531092	PALES_33551	hypothetical protein	PA1968	PA1968	hypothetical protein
PALES_33391	18.66144934	2.440211182	0.530499114	4.59984026	4.23E-06	1.63E-05	2.440211182	5.42721169	exaB	cytochrome c550	PA1983	exaB	cytochrome c550
PALES_33291	53.46881408	0.914812912	0.304242107	3.00685832	0.002639628	0.006071396	0.914812912	1.885324568	PALES_33291	hypothetical protein	PA1994	PA1994	hypothetical protein
PALES_33271	39.03451451	-0.888123812	0.340451782	-2.608662548	0.009089683	0.018345264	0.888123812	-1.850767682	ppiC1	peptidyl-prolyl cis-trans isomerase C1	PA1996	ppiC1	peptidyl-prolyl cis-trans isomerase C1
PALES_33251	29.50597677	2.137380455	0.429664504	4.974533463	6.54E-07	2.84E-06	2.137380455	4.399624676	PALES_33251	putative transcriptional regulator	PA1998	dchR	transcriptional regulator, DchR
PALES_33241	92.95611999	-3.975637675	0.347896368	-11.42764925	3.04E-30	1.32E-28	3.975637675	-15.73208166	PALES_33241	putative CoA transferase, subunit A	PA1999	dchA	dehydrocarnitine CoA transferase, DchA
PALES_33231	46.53424931	-4.411191145	0.462751355	-9.532529929	1.53E-21	3.08E-20	4.411191145	-21.27653251	PALES_33231	putative CoA transferase, subunit B	PA2000	dchB	dehydrocarnitine CoA transferase, DchB
PALES_33221	150.1949322	-2.080919226	0.29132483	-7.142951828	9.13E-13	7.91E-12	2.080919226	-4.230766974	atoB	acetyl-CoA acetyltransferase	PA2001	atoB	acetyl-CoA acetyltransferase
PALES_33211	30.92370189	-1.016181529	0.390603248	-2.601569585	0.009279824	0.018673534	1.016181529	-2.022558637	PALES_33211	putative short-chain fatty acid transporter	PA2002	PA2002	conserved hypothetical protein
PALES_33201	33.98144633	-0.864325616	0.371147576	-2.328792295	0.019870072	0.037139226	0.864325616	-1.820488485	bdhA	3-hydroxybutyrate dehydrogenase	PA2003	bdhA	3-hydroxybutyrate dehydrogenase
PALES_33151	97.43016922	-0.820427857	0.253629229	-3.234752789	0.001217481	0.0030011	0.820427857	-1.765929633	fahA	fumarylacetoacetase	PA2008	fahA	fumarylacetoacetase
PALES_33121	47.59356513	-2.409467979	0.336392554	-7.162667398	7.91E-13	6.89E-12	2.409467979	-5.312783704	liuE	hydroxymethylglutaryl-CoA lyase	PA2011	liuE	3-hydroxy-3-methylglutaryl-CoA lyase
PALES_33111	194.4961545	-2.538983506	0.249447198	-10.17844067	2.47E-24	6.40E-23	2.538983506	-5.811793753	liuD	methylcrotonyl-CoA carboxylase, alpha-subunit (biotin-containing)	PA2012	liuD	methylcrotonyl-CoA carboxylase, alpha-subunit (biotin-containing)
PALES_33101	78.48487894	-3.23347162	0.330153518	-9.793842704	1.20E-22	2.67E-21	3.23347162	-9.405284735	liuC	gamma-carboxygeranoyl-CoA hydratase	PA2013	liuC	putative 3-methylglutaconyl-CoA hydratase
PALES_33091	116.643657	-3.188728586	0.282462437	-11.2890359	1.49E-29	6.04E-28	3.188728586	-9.11807064	liuB	methylcrotonyl-CoA carboxylase, beta-subunit	PA2014	liuB	methylcrotonyl-CoA carboxylase, beta-subunit
PALES_33081	240.8973317	-2.277629819	0.218294187	-10.43376306	1.74E-25	4.92E-24	2.277629819	-4.848806963	liuA	putative isovaleryl-CoA dehydrogenase	PA2015	liuA	putative isovaleryl-CoA dehydrogenase
PALES_33071	95.27245661	-2.403844273	0.32291757	-7.444142096	9.76E-14	9.34E-13	2.403844273	-5.292114489	liuR	regulator of liu genes	PA2016	liuR	regulator of liu genes
PALES_33061	52.72482186	1.963265368	0.34735838	5.651987927	1.59E-08	8.74E-08	1.963265368	3.899435717	PALES_33061	hypothetical protein	PA2017	PA2017	hypothetical protein
PALES_33051	64.88241465	-1.172552855	0.314587936	-3.727265803	1.94E-04	5.63E-04	1.172552855	-2.254102086	PALES_33051	multidrug efflux protein	PA2018	mexY	Resistance-Nodulation-Cell Division (RND) multidrug efflux transporter MexY
PALES_33001	654.5289586	-1.234911145	0.185300195	-6.664381263	2.66E-11	2.00E-10	1.234911145	-2.353668508	galU	UTP--glucose-1-phosphate uridylyltransferase	PA2023	galU	UTP--glucose-1-phosphate uridylyltransferase
PALES_32991	108.2126163	0.831397339	0.313468886	2.652248362	0.00799577	0.01634561	0.831397339	1.779407995	PALES_32991	putative ring-cleaving dioxygenase	PA2024	PA2024	probable ring-cleaving dioxygenase
PALES_32951	63.06203536	1.395585359	0.342849284	4.070550601	4.69E-05	1.53E-04	1.395585359	2.630952786	PALES_32951	hypothetical protein	PA2027	PA2027	hypothetical protein
PALES_32941	32.72764459	1.625824707	0.388094307	4.189251628	2.80E-05	9.51E-05	1.625824707	3.086185344	PALES_32941	putative transcriptional regulator	PA2028	PA2028	probable transcriptional regulator
PALES_32921	266.4652332	1.794413189	0.267024398	6.720034591	1.82E-11	1.39E-10	1.794413189	3.468743562	PALES_32921	hypothetical protein	PA2030	PA2030	hypothetical protein
PALES_32911	51.63280516	1.533098201	0.353153215	4.341170169	1.42E-05	5.03E-05	1.533098201	2.894066757	PALES_32911	hypothetical protein	PA2031	PA2031	hypothetical protein
PALES_32891	293.9780833	2.149672533	0.241713435	8.893475571	5.92E-19	9.36E-18	2.149672533	4.437270589	PALES_32891	putative siderophore-interacting protein	PA2033	PA2033	hypothetical protein
PALES_32881	28.26075688	2.004405255	0.488258559	4.105212736	4.04E-05	1.33E-04	2.004405255	4.012232628	PALES_32881	putative methylase	PA2034	PA2034	hypothetical protein
PALES_32871	27.90291027	1.197688255	0.39869855	3.003994514	0.002664601	0.006123818	1.197688255	2.293718357	PALES_32871	thiamine pyrophosphate protein	PA2035	PA2035	probable decarboxylase
PALES_32801	191.3787066	-1.720964196	0.223010208	-7.716974985	1.19E-14	1.25E-13	1.720964196	-3.296566527	PALES_32801	serine/threonine transporter SstT	PA2042	PA2042	probable transporter (membrane subunit)
PALES_32751	43.35794315	0.909586859	0.319263347	2.849017491	0.004385447	0.009606479	0.909586859	1.878507478	PALES_32751	putative transcriptional regulator	PA2047	cmrA	chloramphenicol resistance activator CmrA
PALES_32731	12.31281046	1.499394943	0.560869863	2.673338401	0.007510045	0.015467618	1.499394943	2.82724115	PALES_32731	putative ntibiotic biosynthesis monooxygenase	PA2048	PA2048	hypothetical protein
PALES_32671	19.34524087	2.047269391	0.516777386	3.961607929	7.44E-05	2.35E-04	2.047269391	4.133229266	cynR	DNA-binding transcriptional regulator CynR	PA2054	cynR	transcriptional regulator CynR
PALES_32641	10.26220951	2.016447603	0.643987659	3.131189823	0.001740996	0.004152954	2.016447603	4.045863378	PALES_32641	putative TonB-dependent receptor	PA2057	sppR	TonB-dependent receptor, SppR
PALES_32591	64.29285525	-0.88932389	0.300199764	-2.962440339	0.00305211	0.006910848	0.88932389	-1.852307848	PALES_32591	putative pyridoxal-phosphate dependent enzyme	PA2062	PA2062	probable pyridoxal-phosphate dependent enzyme
PALES_32581	16.0672074	-2.011743665	0.501044287	-4.015101491	5.94E-05	1.90E-04	2.011743665	-4.032693234	PALES_32581	hypothetical protein	PA2063	PA2063	hypothetical protein
PALES_32561	143.0110059	-1.072164157	0.229105312	-4.679787431	2.87E-06	1.15E-05	1.072164157	-2.102585048	PALES_32561	hypothetical protein	PA2066	PA2066	hypothetical protein
PALES_32541	108.7884272	-1.48510271	0.27595139	-5.381754772	7.38E-08	3.70E-07	1.48510271	-2.799371021	PALES_32541	putative major facilitator superfamily (MFS) transporter	PA2068	PA2068	probable major facilitator superfamily (MFS) transporter
PALES_32531	824.3210421	-1.558681888	0.216005984	-7.215919962	5.36E-13	4.73E-12	1.558681888	-2.945845746	PALES_32531	putative carbamoyl transferase	PA2069	PA2069	probable carbamoyl transferase
PALES_32511	973.8251201	0.640635858	0.181958962	3.520771113	4.30E-04	0.00116917	0.640635858	1.559016134	fusA2	elongation factor G	PA2071	fusA2	elongation factor G
PALES_32501	239.9976918	1.491298338	0.239209604	6.234274523	4.54E-10	2.97E-09	1.491298338	2.811418719	PALES_32501	putative sensory box protein	PA2072	PA2072	conserved hypothetical protein
PALES_32491	16.89178821	2.982821991	0.616564715	4.837808457	1.31E-06	5.50E-06	2.982821991	7.905309743	PALES_32491	putative transporter (membrane subunit)	PA2073	PA2073	probable transporter (membrane subunit)
PALES_32471	44.07089045	2.617794748	0.388226171	6.742963099	1.55E-11	1.20E-10	2.617794748	6.138111055	PALES_32471	hypothetical protein	PA2075	PA2075	hypothetical protein
PALES_32411	67.2260537	-1.288826377	0.279511889	-4.610989463	4.01E-06	1.56E-05	1.288826377	-2.443292144	PALES_32411	putative kynureninase	PA2080	kynU	kynureninase KynU
PALES_32401	124.2326583	-1.577648459	0.268511409	-5.875536025	4.21E-09	2.49E-08	1.577648459	-2.984829365	kynB	kynurenine formamidase, KynB	PA2081	kynB	kynurenine formamidase, KynB
PALES_32371	39.99545201	0.806068571	0.351619058	2.292448472	0.021879778	0.040371883	0.806068571	1.748440342	PALES_32371	putative asparagine synthetase	PA2084	PA2084	probable asparagine synthetase
PALES_32201	25.48785407	1.347390539	0.44603192	3.020838818	0.002520755	0.005832696	1.347390539	2.544514724	PALES_32201	thiamine pyrophosphate protein	PA2108	PA2108	probable decarboxylase
PALES_32191	13.1708165	-1.926449373	0.545301831	-3.532812952	4.11E-04	0.001122241	1.926449373	-3.801185345	PALES_32191	putative outer membrane protein	PA2109	PA2109	hypothetical protein
PALES_32181	15.20198964	-4.604827513	0.76670663	-6.005983689	1.90E-09	1.17E-08	4.604827513	-24.33275068	PALES_32181	putative allophanate hydrolase subunit 2	PA2110	PA2110	hypothetical protein
PALES_32171	27.04424658	-6.253888374	0.904357331	-6.915284659	4.67E-12	3.74E-11	6.253888374	-76.31466288	PALES_32171	putative allophanate hydrolase subunit 1	PA2111	PA2111	hypothetical protein
PALES_32161	30.54848813	-5.180091477	0.638424963	-8.113861103	4.90E-16	5.84E-15	5.180091477	-36.25458305	PALES_32161	LamB/YcsF family protein	PA2112	PA2112	conserved hypothetical protein
PALES_32151	61.54283114	-5.234242461	0.481422629	-10.87244791	1.56E-27	5.19E-26	5.234242461	-37.64124551	opdO	pyroglutamate porin OpdO	PA2113	opdO	pyroglutamate porin OpdO
PALES_32141	130.7488248	-3.043257778	0.277333176	-10.97329148	5.14E-28	1.77E-26	3.043257778	-8.24350443	PALES_32141	putative major facilitator superfamily (MFS) transporter	PA2114	PA2114	probable major facilitator superfamily (MFS) transporter
PALES_32121	36.78520997	-2.657137907	0.420402704	-6.320458649	2.61E-10	1.73E-09	2.657137907	-6.307804324	PALES_32121	hypothetical protein	PA2116	PA2116	conserved hypothetical protein
PALES_32111	31.30228266	-0.978345868	0.362420116	-2.699480038	0.006944792	0.014458182	0.978345868	-1.970205162	PALES_32111	hypothetical protein	PA2117	PA2117	hypothetical protein
PALES_32081	207.8546269	-3.327271835	0.255924958	-13.00096661	1.21E-38	1.01E-36	3.327271835	-10.03710867	PALES_32081	alcohol dehydrogenase (Zn-dependent)	PA2119	PA2119	alcohol dehydrogenase (Zn-dependent)
PALES_32071	17.80590545	1.284901706	0.472716061	2.718125768	0.006565288	0.013770597	1.284901706	2.436654507	PALES_32071	hypothetical protein	PA2120	PA2120	hypothetical protein
PALES_32061	58.00761761	1.392482135	0.325361877	4.279795004	1.87E-05	6.50E-05	1.392482135	2.625299712	PALES_32061	putative transcriptional regulator	PA2121	PA2121	probable transcriptional regulator
PALES_32051	39.97825414	1.478649371	0.352049028	4.200123432	2.67E-05	9.09E-05	1.478649371	2.78687708	PALES_32051	hypothetical protein	PA2122	PA2122	hypothetical protein
PALES_32011	29.92294602	-2.274740562	0.386735561	-5.881901722	4.06E-09	2.41E-08	2.274740562	-4.839106067	PALES_32011	putative transcriptional regulator	PA2126	cgrC	cupA gene regulator C, CgrC
PALES_32011	29.92294602	-2.274740562	0.386735561	-5.881901722	4.06E-09	2.41E-08	2.274740562	-4.839106067	PALES_32011	putative transcriptional regulator	PA2126	cgrB	cupA gene regulator B, CgrB
PALES_32001	56.03015836	-4.158839617	0.410006351	-10.14335415	3.55E-24	8.92E-23	4.158839617	-17.86222155	PALES_32001	putative phosphoadenosine phosphosulfate sulfotransferase	PA2127	cgrA	cupA gene regulator A, CgrA
PALES_31991	16.27991854	-1.064315576	0.462161051	-2.302910587	0.021283874	0.03942533	1.064315576	-2.091177576	cupA1	fimbrial subunit CupA1	PA2128	cupA1	fimbrial subunit CupA1
PALES_31931	192.2345919	1.549099597	0.268949228	5.759821685	8.42E-09	4.81E-08	1.549099597	2.926344456	PALES_31931	putative outer membrane protein	PA2134	PA2134	hypothetical protein
PALES_31901	36.77691491	2.035546317	0.406559264	5.006764079	5.54E-07	2.43E-06	2.035546317	4.099779496	PALES_31901	putative histidine kinase	PA2137	PA2137	hypothetical protein
PALES_31891	168.7624207	1.705541083	0.322397812	5.290175731	1.22E-07	5.96E-07	1.705541083	3.261512331	ligD	ATP-dependent DNA ligase	PA2138	ligD	Multifunctional non-homologous end joining protein LigD
PALES_31851	21.21707709	1.887331155	0.4626396	4.079484667	4.51E-05	1.48E-04	1.887331155	3.699502197	PALES_31851	putative short-chain dehydrogenase	PA2142	PA2142	probable short-chain dehydrogenase
PALES_31831	106.468046	1.322253943	0.28462094	4.645666419	3.39E-06	1.33E-05	1.322253943	2.500564715	PALES_31831	hypothetical protein	PA2143	PA2143	hypothetical protein
PALES_31821	260.2267379	0.868278632	0.220479011	3.938146441	8.21E-05	2.57E-04	0.868278632	1.825483504	glgP	glycogen phosphorylase	PA2144	glgP	glycogen phosphorylase
PALES_31801	307.7051565	2.403459378	0.334395621	7.187472648	6.60E-13	5.79E-12	2.403459378	5.290702799	PALES_31801	hypothetical protein	PA2146	PA2146	conserved hypothetical protein
PALES_31791	178.889101	1.105174686	0.273010435	4.048104186	5.16E-05	1.67E-04	1.105174686	2.151249245	katE	hydroperoxidase II	PA2147	katE	catalase HPII
PALES_31781	21.57493848	1.831944475	0.456821227	4.010199982	6.07E-05	1.94E-04	1.831944475	3.56016591	PALES_31781	putative Mg(2+) transporter	PA2148	PA2148	conserved hypothetical protein
PALES_31771	14.39976978	1.380983761	0.509260221	2.71174481	0.00669301	0.014013765	1.380983761	2.604459063	PALES_31771	hypothetical protein	PA2149	PA2149	hypothetical protein
PALES_31761	45.68461992	2.524423885	0.367248285	6.873888835	6.25E-12	4.97E-11	2.524423885	5.753436329	PALES_31761	putative KU domain protein	PA2150	PA2150	conserved hypothetical protein
PALES_31751	179.004965	1.646030351	0.244731633	6.725858568	1.75E-11	1.34E-10	1.646030351	3.129712968	PALES_31751	putative alpha-amylase family protein	PA2151	PA2151	conserved hypothetical protein
PALES_31741	193.8614871	1.822323812	0.236346709	7.710383707	1.25E-14	1.31E-13	1.822323812	3.536503801	PALES_31741	putative trehalose synthase	PA2152	PA2152	probable trehalose synthase
PALES_31731	94.32102731	2.125694623	0.294389323	7.220691982	5.17E-13	4.58E-12	2.125694623	4.36413165	glgB	glycogen branching enzyme	PA2153	glgB	1,4-alpha-glucan branching enzyme
PALES_31711	16.88032886	3.729167291	0.710882163	5.24583044	1.56E-07	7.46E-07	3.729167291	13.26145614	PALES_31711	cardiolipin synthase 2	PA2155	PA2155	probable phospholipase
PALES_31701	7.775966077	2.194852559	0.749613487	2.927979016	0.003411731	0.007652254	2.194852559	4.578428712	PALES_31701	putative metal-dependent hydrolase	PA2156	PA2156	conserved hypothetical protein
PALES_31691	27.00252049	1.962918224	0.425939599	4.608442673	4.06E-06	1.58E-05	1.962918224	3.89849754	PALES_31691	hypothetical protein	PA2157	PA2157	hypothetical protein
PALES_31681	60.18100999	1.84803596	0.334372206	5.526882692	3.26E-08	1.72E-07	1.84803596	3.600097453	PALES_31681	putative alcohol dehydrogenase (Zn-dependent)	PA2158	PA2158	probable alcohol dehydrogenase (Zn-dependent)
PALES_31671	88.62175477	1.600931036	0.281702519	5.683055445	1.32E-08	7.38E-08	1.600931036	3.033390085	PALES_31671	hypothetical protein	PA2159	PA2159	conserved hypothetical protein
PALES_31661	130.9798757	1.992896611	0.257047615	7.753025094	8.97E-15	9.54E-14	1.992896611	3.980353629	PALES_31661	putative glycosyl hydrolase	PA2160	PA2160	probable glycosyl hydrolase
PALES_31641	80.23544124	1.877610629	0.338994075	5.538771235	3.05E-08	1.62E-07	1.877610629	3.674659642	PALES_31641	putative glycosyl hydrolase	PA2162	PA2162	probable glycosyl hydrolase
PALES_31631	72.47103335	1.464739626	0.319988347	4.577478025	4.71E-06	1.80E-05	1.464739626	2.760136519	PALES_31631	putative 4-alpha-glucanotransferase	PA2163	PA2163	hypothetical protein
PALES_31621	97.02584149	1.293124705	0.324724838	3.982216793	6.83E-05	2.17E-04	1.293124705	2.45058248	PALES_31621	putative glycosyl hydrolase	PA2164	PA2164	probable glycosyl hydrolase
PALES_31571	48.27859519	1.718328911	0.341308053	5.034539607	4.79E-07	2.12E-06	1.718328911	3.290550381	PALES_31571	hypothetical protein	PA2169	PA2169	hypothetical protein
PALES_31551	277.6453248	1.787386381	0.260835404	6.852545147	7.25E-12	5.71E-11	1.787386381	3.451889735	PALES_31551	hypothetical protein	PA2171	PA2171	hypothetical protein
PALES_31541	118.7510398	1.406100906	0.25945698	5.419399026	5.98E-08	3.05E-07	1.406100906	2.650199389	PALES_31541	putative cellulase	PA2172	PA2172	hypothetical protein
PALES_31531	39.23217609	1.325043518	0.360157561	3.679066229	2.34E-04	6.68E-04	1.325043518	2.505404451	PALES_31531	hypothetical protein	PA2173	PA2173	hypothetical protein
PALES_31511	393.2700353	3.515307133	0.254024002	13.83848419	1.49E-43	1.65E-41	3.515307133	11.4343871	PALES_31511	hypothetical protein	PA2174	PA2174	hypothetical protein
PALES_31481	169.1142771	1.280701101	0.237749952	5.386756516	7.17E-08	3.61E-07	1.280701101	2.429570172	PALES_31481	putative sensor/response regulator hybrid	PA2177	PA2177	probable sensor/response regulator hybrid
PALES_31461	24.44783486	1.54254467	0.454615322	3.393076728	6.91E-04	0.001801693	1.54254467	2.913078684	PALES_31461	putative methylase	PA2179	PA2179	hypothetical protein
PALES_31451	55.0342891	1.490655516	0.319548786	4.664876165	3.09E-06	1.23E-05	1.490655516	2.810166314	PALES_31451	hypothetical protein	PA2180	PA2180	hypothetical protein
PALES_31441	15.35909356	1.922417331	0.552588874	3.478928767	5.03E-04	0.001345572	1.922417331	3.790576631	PALES_31441	carboxylate-amine ligase	PA2181	PA2181	hypothetical protein
PALES_31431	35.47453957	1.86660613	0.397594782	4.694745034	2.67E-06	1.07E-05	1.86660613	3.646736931	PALES_31431	hypothetical protein	PA2182	PA2182	hypothetical protein
PALES_31411	156.1525452	2.260199971	0.256140519	8.824062591	1.10E-18	1.69E-17	2.260199971	4.790578791	PALES_31411	hypothetical protein	PA2184	PA2184	conserved hypothetical protein
PALES_31401	46.9817245	2.363209284	0.356266538	6.633261982	3.28E-11	2.45E-10	2.363209284	5.145136257	katN	non-heme catalase KatN	PA2185	katN	non-heme catalase KatN
PALES_31391	15.36954051	2.565973913	0.582156406	4.407705366	1.04E-05	3.77E-05	2.565973913	5.921546117	PALES_31391	hypothetical protein	PA2186	PA2186	hypothetical protein
PALES_31381	36.24064356	1.626782445	0.399734043	4.069662004	4.71E-05	1.53E-04	1.626782445	3.088234799	PALES_31381	putative small intergral membrane protein	PA2187	PA2187	hypothetical protein
PALES_31361	11.48596066	1.376034323	0.589012837	2.336170344	0.019482365	0.036471908	1.376034323	2.595539283	PALES_31361	hypothetical protein	PA2189	PA2189	hypothetical protein
PALES_31351	194.9046712	1.594504666	0.260756827	6.114910532	9.66E-10	6.18E-09	1.594504666	3.019908139	PALES_31351	hypothetical protein	PA2190	PA2190	conserved hypothetical protein
PALES_31331	22.71288453	1.230159745	0.424328748	2.89907236	0.003742685	0.008312222	1.230159745	2.345929642	PALES_31331	hypothetical protein	PA2192	PA2192	conserved hypothetical protein
PALES_31321	154.2181552	-3.895573575	0.308650956	-12.62129115	1.61E-36	1.20E-34	3.895573575	-14.88279488	hcnA	hydrogen cyanide synthase HcnA	PA2193	hcnA	hydrogen cyanide synthase HcnA
PALES_31311	295.2364423	-4.327797301	0.308690912	-14.01984036	1.18E-44	1.44E-42	4.327797301	-20.0815302	hcnB	hydrogen cyanide synthase HcnB	PA2194	hcnB	hydrogen cyanide synthase HcnB
PALES_31301	424.6841625	-4.47804826	0.313940636	-14.26399691	3.67E-46	5.29E-44	4.47804826	-22.28572917	hcnC	hydrogen cyanide synthase HcnC	PA2195	hcnC	hydrogen cyanide synthase HcnC
PALES_31211	102.4287447	-3.78542578	0.346761619	-10.91650742	9.61E-28	3.26E-26	3.78542578	-13.78880742	PALES_31211	putative binding protein component of ABC transporter	PA2204	PA2204	probable binding protein component of ABC transporter
PALES_31201	10.98216888	-1.750450002	0.58594702	-2.987386133	0.002813741	0.006438565	1.750450002	-3.364634987	PALES_31201	hypothetical protein	PA2205	PA2205	hypothetical protein
PALES_30731	582.3344614	1.769494327	0.223574214	7.914572498	2.48E-15	2.80E-14	1.769494327	3.409344363	pslA	putative glycosyl transferase	PA2231	pslA	PslA
PALES_30681	89.81077475	0.641834171	0.277813696	2.31030428	0.020871314	0.038751698	0.641834171	1.560311602	pslF	putative glycosyl transferase	PA2236	pslF	PslF
PALES_30671	184.6742183	0.991354942	0.221918609	4.467200587	7.92E-06	2.91E-05	0.991354942	1.988051241	pslG	putative glycosyl hydrolase	PA2237	pslG	PslG
PALES_30641	38.267798	0.881676159	0.35629039	2.474599886	0.013338552	0.026047151	0.881676159	1.842514738	pslJ	hypothetical protein	PA2240	pslJ	PslJ
PALES_30631	22.75484214	1.027012703	0.433044977	2.371607469	0.017710895	0.033468891	1.027012703	2.037800336	pslK	hypothetical protein	PA2241	pslK	PslL
PALES_30611	12.74051068	1.219110365	0.537219835	2.269295147	0.023250383	0.042603304	1.219110365	2.328031155	pslM	putative FAD-binding dehydrogenase	PA2243	pslM	hypothetical protein
PALES_30571	726.0083544	-2.639225332	0.235819281	-11.19172835	4.48E-29	1.74E-27	2.639225332	-6.2299705	bkdA1	2-oxoisovalerate dehydrogenase (alpha subunit)	PA2247	bkdA1	2-oxoisovalerate dehydrogenase (alpha subunit)
PALES_30561	268.0256438	-2.940555444	0.267090528	-11.00958342	3.44E-28	1.20E-26	2.940555444	-7.677068092	bkdA2	2-oxoisovalerate dehydrogenase (beta subunit)	PA2248	bkdA2	2-oxoisovalerate dehydrogenase (beta subunit)
PALES_30551	303.7717835	-3.019688979	0.254200021	-11.87918464	1.52E-32	7.68E-31	3.019688979	-8.109927287	bkdB	branched-chain alpha-keto acid dehydrogenase subunit E2	PA2249	bkdB	branched-chain alpha-keto acid dehydrogenase (lipoamide component)
PALES_30541	317.657754	-2.499717766	0.234280349	-10.66977141	1.41E-26	4.38E-25	2.499717766	-5.655747709	lpdV	dihydrolipoamide dehydrogenase	PA2250	lpdV	lipoamide dehydrogenase-Val
PALES_30451	558.5712668	0.892554325	0.221220478	4.034682205	5.47E-05	1.76E-04	0.892554325	1.856460121	ptxS	transcriptional regulator PtxS	PA2259	ptxS	transcriptional regulator PtxS
PALES_30441	26.699188	2.303972521	0.451339392	5.104745039	3.31E-07	1.52E-06	2.303972521	4.93815637	PALES_30441	putative putative epimerase	PA2260	PA2260	hypothetical protein
PALES_30431	56.37107907	2.186844175	0.324919404	6.730420373	1.69E-11	1.30E-10	2.186844175	4.553084312	PALES_30431	putative 2-ketogluconate kinase	PA2261	PA2261	probable 2-ketogluconate kinase
PALES_30421	30.96351037	2.341728851	0.419676445	5.579843418	2.41E-08	1.30E-07	2.341728851	5.06909728	PALES_30421	putative 2-ketogluconate transporter	PA2262	PA2262	probable 2-ketogluconate transporter
PALES_30411	35.28667908	2.64915872	0.420982001	6.292807568	3.12E-10	2.06E-09	2.64915872	6.273013727	PALES_30411	putative 2-hydroxyacid dehydrogenase	PA2263	PA2263	probable 2-hydroxyacid dehydrogenase
PALES_30401	84.70204014	1.854669085	0.301017743	6.16132813	7.21E-10	4.65E-09	1.854669085	3.616687845	PALES_30401	hypothetical protein	PA2264	PA2264	conserved hypothetical protein
PALES_30391	88.27089673	1.425697031	0.290407859	4.909292177	9.14E-07	3.89E-06	1.425697031	2.686442634	PALES_30391	gluconate dehydrogenase	PA2265	PA2265	gluconate dehydrogenase
PALES_30381	40.2227234	1.196122578	0.346772631	3.449299258	5.62E-04	0.001485785	1.196122578	2.291230461	PALES_30381	putative cytochrome c precursor	PA2266	PA2266	probable cytochrome c precursor
PALES_30361	58.08509008	4.159140807	0.491938372	8.454597252	2.80E-17	3.71E-16	4.159140807	17.86595102	PALES_30361	hypothetical protein	PA2268	PA2268	hypothetical protein
PALES_30311	25.67515567	1.331418703	0.426353468	3.122804909	0.001791364	0.004256841	1.331418703	2.516500184	PALES_30311	putative transcriptional regulator	PA2273	soxR	SoxR
PALES_30301	12.88608953	-1.541530742	0.525291093	-2.934621895	0.003339544	0.007508052	1.541530742	-2.911032088	PALES_30301	hypothetical protein	PA2274	PA2274	hypothetical protein
PALES_30281	23.10968061	1.630839779	0.43850616	3.719080663	2.00E-04	5.79E-04	1.630839779	3.096932158	PALES_30281	putative transcriptional regulator	PA2276	PA2276	probable transcriptional regulator
PALES_30231	32.75195054	-1.514537532	0.348172026	-4.349969036	1.36E-05	4.85E-05	1.514537532	-2.857072275	PALES_30231	putative transcriptional regulator	PA2281	PA2281	probable transcriptional regulator
PALES_30161	44.76011562	2.009101413	0.368712967	5.44895784	5.07E-08	2.62E-07	2.009101413	4.025314239	PALES_30161	hypothetical protein	PA2288	PA2288	hypothetical protein
PALES_30151	123.0973474	1.1523343	0.267880432	4.301674045	1.70E-05	5.93E-05	1.1523343	2.222732447	PALES_30151	putative TonB-dependent receptor	PA2289	PA2289	conserved hypothetical protein
PALES_30141	467.2777265	0.982876882	0.207803961	4.729827458	2.25E-06	9.13E-06	0.982876882	1.976402632	gcd	glucose dehydrogenase	PA2290	gcd	glucose dehydrogenase
PALES_30131	107.8923086	1.201233323	0.255756629	4.696782744	2.64E-06	1.06E-05	1.201233323	2.299361536	PALES_30131	putative glucose-sensitive porin	PA2291	PA2291	probable glucose-sensitive porin
PALES_30061	40.62930936	-1.87517935	0.335789409	-5.584390985	2.35E-08	1.27E-07	1.87517935	-3.668472194	PALES_30061	putative oxidoreductase	PA2298	PA2298	probable oxidoreductase
PALES_30041	1531.673278	-3.815022996	0.238420019	-16.00126961	1.25E-57	3.31E-55	3.815022996	-14.07460956	chiC	chitinase	PA2300	chiC	chitinase
PALES_30021	388.4072363	-1.45347339	0.243978823	-5.957375207	2.56E-09	1.55E-08	1.45347339	-2.738666115	ambE	AmbE	PA2302	ambE	AmbE
PALES_30011	75.72753755	-1.084208916	0.286714145	-3.781497826	1.56E-04	4.59E-04	1.084208916	-2.120212572	ambD	AmbD	PA2303	ambD	AmbD
PALES_30001	90.32149978	-1.120143619	0.291511591	-3.842535433	1.22E-04	3.66E-04	1.120143619	-2.173686103	ambC	AmbC	PA2304	ambC	AmbC
PALES_29981	339.4054811	1.180357937	0.213519191	5.528111697	3.24E-08	1.71E-07	1.180357937	2.266329984	ambA	AmbA	PA2306	ambA	AmbA
PALES_29851	55.31520997	2.024395401	0.329981525	6.134874972	8.52E-10	5.46E-09	2.024395401	4.068213521	gntR	transcriptional regulator GntR	PA2320	gntR	transcriptional regulator GntR
PALES_29841	91.94163638	2.10726716	0.330127243	6.383196802	1.73E-10	1.19E-09	2.10726716	4.30874333	PALES_29841	gluconokinase	PA2321	gntK	GntK
PALES_29831	12.61207079	3.212877057	0.716938401	4.481385085	7.42E-06	2.75E-05	3.212877057	9.271977447	PALES_29831	gluconate permease	PA2322	gntP	GntP
PALES_29781	13.20023732	1.582733133	0.539417994	2.934149679	0.003344629	0.007512381	1.582733133	2.99536774	PALES_29781	putative xenobiotic compound monooxygenase, DszA family	PA2326	PA2326	hypothetical protein
PALES_29751	35.16945941	-1.005050351	0.37513957	-2.679137133	0.007381216	0.015233368	1.005050351	-2.007013542	PALES_29751	putative sulfonate ABC transporter, periplasmic sulfonate-binding protein	PA2328	PA2328	hypothetical protein
PALES_29741	41.69273135	-1.556789942	0.347929338	-4.474442864	7.66E-06	2.83E-05	1.556789942	-2.941985104	PALES_29741	putative ATP-binding component of ABC transporter	PA2329	PA2329	probable ATP-binding component of ABC transporter
PALES_29731	45.94392918	-1.852822774	0.384698374	-4.816299987	1.46E-06	6.09E-06	1.852822774	-3.612062293	PALES_29731	putative acyl-CoA dehydrogenase	PA2330	PA2330	hypothetical protein
PALES_29721	91.28527817	-1.983117443	0.299600893	-6.619197365	3.61E-11	2.67E-10	1.983117443	-3.953464427	PALES_29721	putative alkylhydroperoxidase	PA2331	PA2331	hypothetical protein
PALES_29651	28.11106812	-1.462783987	0.40684599	-3.595424366	3.24E-04	9.04E-04	1.462783987	-2.756397563	PALES_29651	putative binding protein component of ABC maltose/mannitol transporter	PA2338	PA2338	probable binding protein component of ABC maltose/mannitol transporter
PALES_29621	10.13146625	-1.724086869	0.577602495	-2.984902046	0.002836691	0.006481724	1.724086869	-3.303709579	PALES_29621	putative ATP-binding component of ABC maltose/mannitol transporter	PA2341	PA2341	probable ATP-binding component of ABC maltose/mannitol transporter
PALES_29451	13.6669739	1.864293527	0.5761375	3.235848257	0.001212818	0.002991157	1.864293527	3.640895987	PALES_29451	hypothetical protein	PA2358	PA2358	hypothetical protein
PALES_29391	66.33871929	1.012191813	0.294432996	3.437766235	5.87E-04	0.001547707	1.012191813	2.016973058	PALES_29391	hypothetical protein	PA2364	lip3	Lip3
PALES_29381	548.6513586	0.598615929	0.211465319	2.830799542	0.004643181	0.010113755	0.598615929	1.514263139	PALES_29381	hypothetical protein	PA2365	hsiB3	HsiB3
PALES_29271	50.69490397	1.783570126	0.344374363	5.179160578	2.23E-07	1.04E-06	1.783570126	3.442770771	PALES_29271	hypothetical protein	PA2375	PA2375	hypothetical protein
PALES_29261	24.73671991	1.886372418	0.43902753	4.296706448	1.73E-05	6.04E-05	1.886372418	3.697044523	PALES_29261	putative transcriptional regulator	PA2376	PA2376	probable transcriptional regulator
PALES_29221	91.64993345	0.770779236	0.306497687	2.514796254	0.011910119	0.023482244	0.770779236	1.706191092	PALES_29221	hypothetical protein	PA2380	PA2380	hypothetical protein
PALES_29211	128.054799	-2.714510159	0.371636064	-7.304216201	2.79E-13	2.55E-12	2.714510159	-6.563703904	PALES_29211	hypothetical protein	PA2381	PA2381	hypothetical protein
PALES_29201	48.73915525	-2.474009975	0.326589813	-7.575282125	3.58E-14	3.58E-13	2.474009975	-5.555858959	lldA	L-lactate dehydrogenase	PA2382	lldA	L-lactate dehydrogenase
PALES_29171	166.5870386	-1.584671445	0.226253094	-7.00397691	2.49E-12	2.05E-11	1.584671445	-2.999394827	pvdQ	PvdQ	PA2385	pvdQ	3-oxo-C12-homoserine lactone acylase PvdQ
PALES_29161	958.863161	-1.410567649	0.236191381	-5.972138548	2.34E-09	1.42E-08	1.410567649	-2.658417415	pvdA	L-ornithine N5-oxygenase	PA2386	pvdA	L-ornithine N5-oxygenase
PALES_29111	56.60391903	-0.72675848	0.289842467	-2.5074258	0.012161411	0.02391543	0.72675848	-1.654916561	opmQ	putative outer membrane protein precursor	PA2391	opmQ	probable outer membrane protein precursor
PALES_29101	24.7029413	-1.369636373	0.38453341	-3.561813715	3.68E-04	0.001014056	1.369636373	-2.584054277	pvdP	PvdP	PA2392	pvdP	PvdP
PALES_29091	19.95883781	-1.454612471	0.443465606	-3.280102111	0.001037695	0.002601076	1.454612471	-2.740829284	PALES_29091	putative dipeptidase precursor	PA2393	PA2393	putative dipeptidase
PALES_29081	125.7081472	-1.959011031	0.252044583	-7.772478226	7.70E-15	8.24E-14	1.959011031	-3.887953678	pvdN	PvdN	PA2394	pvdN	PvdN
PALES_29071	128.2892489	-2.189713835	0.291838929	-7.503158814	6.23E-14	6.05E-13	2.189713835	-4.562149852	pvdO	PvdO	PA2395	pvdO	PvdO
PALES_29061	238.9507184	-1.462036909	0.217212887	-6.730893962	1.69E-11	1.30E-10	1.462036909	-2.754970574	pvdF	pyoverdine synthetase F	PA2396	pvdF	pyoverdine synthetase F
PALES_28911	32.57810848	-0.901544348	0.354405862	-2.543818948	0.01096479	0.021769343	0.901544348	-1.868064602	PALES_28911	hypothetical protein	PA2405	fpvJ	FpvJ
PALES_28891	50.46985003	-0.865623611	0.296488008	-2.919590636	0.003504915	0.00785015	0.865623611	-1.822127119	PALES_28891	putative adhesion protein	PA2407	fpvC	FpvC
PALES_28881	22.83839502	-0.910380076	0.405145765	-2.2470433	0.02463726	0.044902327	0.910380076	-1.879540596	PALES_28881	putative ATP-binding component of ABC transporter	PA2408	fpvD	FpvD
PALES_28871	36.3444717	-0.904406365	0.399488333	-2.263911838	0.023579538	0.043156544	0.904406365	-1.871774146	PALES_28871	putative permease of ABC transporter	PA2409	fpvE	FpvE
PALES_28861	86.21655958	-0.812558082	0.259382826	-3.132659531	0.001732303	0.00413509	0.812558082	-1.756322867	PALES_28861	putative ABC transporter, periplasmic substrate-binding protein	PA2410	fpvF	FpvF
PALES_28851	304.5160661	-0.643026002	0.228475189	-2.814423767	0.004886477	0.010585511	0.643026002	-1.56160113	PALES_28851	putative thioesterase	PA2411	PA2411	probable thioesterase
PALES_28841	98.34573407	-1.046730315	0.272358716	-3.843204769	1.21E-04	3.66E-04	1.046730315	-2.065842568	PALES_28841	putative MbtH-like protein	PA2412	PA2412	conserved hypothetical protein
PALES_28831	303.6282567	-1.179791803	0.261497244	-4.511679678	6.43E-06	2.40E-05	1.179791803	-2.265440818	pvdH	diaminobutyrate--2-oxoglutarate aminotransferase	PA2413	pvdH	L-2,4-diaminobutyrate:2-ketoglutarate 4-aminotransferase, PvdH
PALES_28781	12.23652735	1.615112053	0.577774967	2.795399842	0.005183556	0.011127679	1.615112053	3.063353913	PALES_28781	putative pirin-related protein	PA2418	PA2418	hypothetical protein
PALES_28731	378.2956451	0.79131181	0.226356249	3.495869066	4.73E-04	0.001274438	0.79131181	1.730647386	PALES_28731	hypothetical protein	PA2423	PA2423	hypothetical protein
PALES_28711	898.3365689	-0.939389413	0.225961949	-4.157290276	3.22E-05	1.08E-04	0.939389413	-1.917716438	pvdL	peptide synthase	PA2424	pvdL	PvdL
PALES_28691	458.6709625	1.132749722	0.247389749	4.578806219	4.68E-06	1.79E-05	1.132749722	2.192762745	pvdS	extracytoplasmic-function sigma-70 factor	PA2426	pvdS	sigma factor PvdS
PALES_28671	21.72997071	2.727811434	0.519108679	5.254798354	1.48E-07	7.14E-07	2.727811434	6.624499387	PALES_28671	hypothetical protein	PA2428	PA2428	hypothetical protein
PALES_28651	44.46049472	1.578441432	0.33631144	4.693392035	2.69E-06	1.07E-05	1.578441432	2.986470418	PALES_28651	hypothetical protein	PA2430	PA2430	conserved hypothetical protein
PALES_28641	37.50961817	1.93235781	0.386947926	4.993844603	5.92E-07	2.59E-06	1.93235781	3.816784705	PALES_28641	hypothetical protein	PA2431	PA2431	hypothetical protein
PALES_28611	631.9119165	0.908226761	0.233277802	3.893326982	9.89E-05	3.04E-04	0.908226761	1.876737353	PALES_28611	hypothetical protein	PA2433	PA2433	hypothetical protein
PALES_28601	17.29532769	1.026814616	0.464980903	2.208294169	0.027223774	0.049015162	1.026814616	2.037520559	PALES_28601	hypothetical protein	PA2434	PA2434	hypothetical protein
PALES_28591	66.84381599	1.080778538	0.318153209	3.397037991	6.81E-04	0.001779716	1.080778538	2.11517721	PALES_28591	putative cation-transporting P-type ATPase	PA2435	PA2435	probable cation-transporting P-type ATPase
PALES_28581	37.1042639	-1.228519389	0.333671417	-3.681823872	2.32E-04	6.62E-04	1.228519389	-2.343263815	PALES_28581	hypothetical protein	PA2436	PA2436	hypothetical protein
PALES_28521	63.12968745	0.787552479	0.291911284	2.697917222	0.006977479	0.014513522	0.787552479	1.726143588	gcvT2	glycine cleavage system protein T2	PA2442	gcvT2	glycine cleavage system protein T2
PALES_28511	165.6249408	0.905364168	0.242530073	3.732997543	1.89E-04	5.52E-04	0.905364168	1.873017226	sdaA	L-serine dehydratase	PA2443	sdaA	L-serine dehydratase
PALES_28491	145.4229786	-2.306074398	0.255662621	-9.019990434	1.88E-19	3.12E-18	2.306074398	-4.945356065	gcvP2	glycine dehydrogenase	PA2445	gcvP2	glycine cleavage system protein P2
PALES_28461	129.1665524	-1.460976577	0.271705591	-5.377057476	7.57E-08	3.79E-07	1.460976577	-2.752946507	PALES_28461	hypothetical protein	PA2448	PA2448	hypothetical protein
PALES_28451	32.71521914	-0.974750077	0.365802328	-2.664690744	0.007705915	0.015793805	0.974750077	-1.965300711	PALES_28451	putative transcriptional regulator	PA2449	gcsR	GcsR
PALES_28431	100.4593643	-1.728808393	0.286342936	-6.037545104	1.56E-09	9.75E-09	1.728808393	-3.31453938	PALES_28431	hypothetical protein	PA2452	PA2452	hypothetical protein
PALES_28421	16.63273315	-2.491623234	0.518793167	-4.802729475	1.57E-06	6.49E-06	2.491623234	-5.62410385	PALES_28421	hypothetical protein	PA2453	PA2453	hypothetical protein
PALES_28411	38.13810952	-2.058885597	0.369097876	-5.578156178	2.43E-08	1.31E-07	2.058885597	-4.166643297	PALES_28411	hypothetical protein	PA2454	PA2454	hypothetical protein
PALES_28401	9.680946664	-1.473473844	0.581015517	-2.53603183	0.011211654	0.02221309	1.473473844	-2.776897343	PALES_28401	hypothetical protein	PA2455	PA2455	hypothetical protein
PALES_16931	21.06328977	1.580430726	0.487918251	3.23913017	0.001198948	0.002963098	1.580430726	2.990591225	PALES_16931	hypothetical protein	PA2457	PA2457	hypothetical protein
PALES_28341	236.4139	0.951248264	0.222096487	4.283040563	1.84E-05	6.41E-05	0.951248264	1.933544897	PALES_28341	hypothetical protein	PA2462	PA2462	hypothetical protein
PALES_28301	75.76378695	2.550348172	0.339300826	7.516480878	5.63E-14	5.48E-13	2.550348172	5.857756293	foxA	Ferrioxamine receptor FoxA	PA2466	foxA	Ferrioxamine receptor FoxA
PALES_28291	74.74489168	2.870267475	0.332014115	8.64501641	5.38E-18	7.78E-17	2.870267475	7.312007121	foxR	Anti-sigma factor FoxR	PA2467	foxR	Anti-sigma factor FoxR
PALES_28281	41.72067086	3.127553451	0.419859607	7.449045812	9.40E-14	9.01E-13	3.127553451	8.739516402	foxI	ECF sigma factor FoxI	PA2468	foxI	ECF sigma factor FoxI
PALES_28271	23.80282599	2.585774394	0.495444769	5.219097177	1.80E-07	8.54E-07	2.585774394	6.003377518	PALES_28271	putative transcriptional regulator	PA2469	PA2469	probable transcriptional regulator
PALES_28261	10.10849156	1.33764145	0.607095091	2.203347497	0.027570266	0.049601443	1.33764145	2.527377994	gtdA	gentisate 1,2-dioxygenase	PA2470	gtdA	gentisate 1,2-dioxygenase
PALES_28211	150.8715637	1.579010414	0.266250853	5.930536545	3.02E-09	1.82E-08	1.579010414	2.98764848	PALES_28211	putative cytochrome P450	PA2475	PA2475	probable cytochrome P450
PALES_28151	48.65648773	0.793891501	0.327196578	2.426344141	0.0152518	0.029290108	0.793891501	1.733744734	PALES_28151	hypothetical protein	PA2481	PA2481	hypothetical protein
PALES_28141	144.0787446	1.580332828	0.243173573	6.498785254	8.10E-11	5.77E-10	1.580332828	2.990388297	PALES_28141	putative cytochrome c	PA2482	PA2482	probable cytochrome c
PALES_28131	261.4959833	1.821302707	0.246346804	7.393246755	1.43E-13	1.36E-12	1.821302707	3.534001634	PALES_28131	putative flavin-dependent oxidoreductase	PA2483	PA2483	conserved hypothetical protein
PALES_28111	40.77091166	1.290227888	0.346797847	3.720403397	1.99E-04	5.77E-04	1.290227888	2.445666842	PALES_28111	hypothetical protein	PA2485	PA2485	hypothetical protein
PALES_28101	68.62740256	0.998413903	0.288773259	3.457431986	5.45E-04	0.001446257	0.998413903	1.997802411	PALES_28101	hypothetical protein	PA2486	ptrC	Pseudomonas type III repressor gene C, PtrC
PALES_28081	7.544019411	1.997184262	0.746498543	2.67540276	0.007463952	0.01539076	1.997184262	3.992200731	PALES_28081	putative transcriptional regulator	PA2488	PA2488	probable transcriptional regulator
PALES_28071	28.60125078	1.192441236	0.377474255	3.15900017	0.001583114	0.003803793	1.192441236	2.285391354	PALES_28071	putative transcriptional regulator	PA2489	PA2489	probable transcriptional regulator
PALES_27921	22.94735867	-1.955504169	0.412682386	-4.738521044	2.15E-06	8.79E-06	1.955504169	-3.878514428	PALES_27921	hypothetical protein	PA2503	PA2503	hypothetical protein
PALES_27901	14.34263451	1.423974458	0.511478169	2.78403761	0.005368681	0.011478452	1.423974458	2.683236944	opdT	tyrosine porin OpdT	PA2505	opdT	tyrosine porin OpdT
PALES_27891	16.30998652	3.295954509	0.701988719	4.695167345	2.66E-06	1.07E-05	3.295954509	9.821575771	PALES_27891	hypothetical protein	PA2506	PA2506	hypothetical protein
PALES_27881	46.39184913	1.357925816	0.326088394	4.164287485	3.12E-05	1.05E-04	1.357925816	2.563164047	catA	catechol 1,2-dioxygenase	PA2507	catA	catechol 1,2-dioxygenase
PALES_27871	42.66015238	1.792250306	0.37930797	4.72505312	2.30E-06	9.33E-06	1.792250306	3.463547132	catC	muconolactone delta-isomerase	PA2508	catC	muconolactone delta-isomerase
PALES_27861	32.69573987	1.985973206	0.392219817	5.063418831	4.12E-07	1.84E-06	1.985973206	3.961297918	catB	muconate cycloisomerase I	PA2509	catB	muconate cycloisomerase I
PALES_27841	207.2924604	2.620221125	0.24655154	10.62747825	2.22E-26	6.77E-25	2.620221125	6.148443039	PALES_27841	putative transcriptional regulator	PA2511	antR	AntR
PALES_27761	29.24843973	1.899446771	0.423920683	4.480665483	7.44E-06	2.76E-05	1.899446771	3.730701083	xylS	transcriptional regulator XylS	PA2519	xylS	transcriptional regulator XylS
PALES_27721	21.73516057	1.333096465	0.441193955	3.021565572	0.002514712	0.005821545	1.333096465	2.519428414	PALES_27721	putative two-component response regulator	PA2523	czcR	CzcR
PALES_27651	163.1351612	-0.771016783	0.262551698	-2.93662844	0.003318014	0.007463177	0.771016783	-1.706472048	PALES_27651	putative protease	PA2529	PA2529	hypothetical protein
PALES_27641	67.15056589	-0.776715392	0.276387706	-2.810238573	0.004950479	0.010704651	0.776715392	-1.7132259	PALES_27641	putative protease	PA2530	PA2530	hypothetical protein
PALES_27631	144.7803185	-1.48430265	0.331920506	-4.471861857	7.75E-06	2.86E-05	1.48430265	-2.797819033	PALES_27631	putative aminotransferase	PA2531	PA2531	probable aminotransferase
PALES_27601	9.867597298	1.576779225	0.619157579	2.546652545	0.010876166	0.021620473	1.576779225	2.983031527	PALES_27601	putative transcriptional regulator	PA2534	PA2534	probable transcriptional regulator
PALES_27581	56.01589366	-1.036451281	0.299023458	-3.466120306	5.28E-04	0.001403634	1.036451281	-2.051175992	PALES_27581	putative phosphatidate cytidylyltransferase	PA2536	PA2536	probable phosphatidate cytidylyltransferase
PALES_27571	59.32206317	-0.676273302	0.285599176	-2.36791055	0.01788886	0.03377943	0.676273302	-1.598006529	PALES_27571	putative acyltransferase	PA2537	PA2537	probable acyltransferase
PALES_27541	151.1695891	-0.65776019	0.247303162	-2.659732224	0.00782028	0.016007503	0.65776019	-1.57763142	PALES_27541	putative lysophospholipas	PA2540	PA2540	conserved hypothetical protein
PALES_27501	184.8897392	0.94581025	0.256379381	3.6891042	2.25E-04	6.45E-04	0.94581025	1.926270419	PALES_27501	putative acetyltransferase	PA2544	PA2544	hypothetical protein
PALES_27491	78.22525939	-1.224747895	0.274199679	-4.466627744	7.95E-06	2.92E-05	1.224747895	-2.337146056	xthA	exonuclease III	PA2545	xthA	exodeoxyribonuclease III
PALES_27451	60.74299531	1.635755438	0.343122382	4.767265339	1.87E-06	7.67E-06	1.635755438	3.107502255	PALES_27451	putative membrane protein, TerC family	PA2549	PA2549	conserved hypothetical protein
PALES_27431	252.1843507	1.861829237	0.267042265	6.972039567	3.12E-12	2.55E-11	1.861829237	3.634682224	PALES_27431	putative transcriptional regulator	PA2551	PA2551	probable transcriptional regulator
PALES_27421	83.46806502	-2.568231068	0.326461177	-7.866880501	3.64E-15	4.07E-14	2.568231068	-5.930817868	PALES_27421	putative acyl-CoA dehydrogenase	PA2552	PA2552	probable acyl-CoA dehydrogenase
PALES_27411	104.0766712	-3.19468769	0.29894982	-10.68636766	1.18E-26	3.69E-25	3.19468769	-9.155811048	PALES_27411	putative acyl-CoA thiolase	PA2553	PA2553	probable acyl-CoA thiolase
PALES_27401	70.49746661	-2.835523543	0.311952905	-9.08958852	9.94E-20	1.68E-18	2.835523543	-7.138018019	PALES_27401	putative short-chain dehydrogenase	PA2554	PA2554	probable short-chain dehydrogenase
PALES_27391	133.4460681	-1.76192972	0.262321111	-6.716690535	1.86E-11	1.42E-10	1.76192972	-3.39151464	PALES_27391	putative AMP-binding enzyme	PA2555	PA2555	probable AMP-binding enzyme
PALES_27371	55.78292903	-2.330914398	0.357316708	-6.523384838	6.87E-11	4.92E-10	2.330914398	-5.03124135	PALES_27371	AMP-binding domain protein	PA2557	PA2557	probable AMP-binding enzyme
PALES_27321	363.0185306	1.392621652	0.299602284	4.648234426	3.35E-06	1.32E-05	1.392621652	2.625553607	PALES_27321	hypothetical protein	PA2560	PA2560	hypothetical protein
PALES_27301	618.1383386	1.081859566	0.212857794	5.082546161	3.72E-07	1.68E-06	1.081859566	2.116762731	PALES_27301	hypothetical protein	PA2562	PA2562	hypothetical protein
PALES_27261	49.41424688	0.831913216	0.316213178	2.630861939	0.008516863	0.017277168	0.831913216	1.780044386	PALES_27261	hypothetical protein	PA2568	PA2568	hypothetical protein
PALES_27251	86.48690035	1.71473771	0.287079671	5.973037746	2.33E-09	1.42E-08	1.71473771	3.282369627	PALES_27251	hypothetical protein	PA2569	PA2569	hypothetical protein
PALES_27241	3453.735782	2.772231674	0.208334511	13.30663682	2.12E-40	1.90E-38	2.772231674	6.83163868	lecA	LecA	PA2570	lecA	LecA
PALES_27231	357.9949912	2.193094342	0.219113259	10.00895313	1.39E-23	3.36E-22	2.193094342	4.572852363	PALES_27231	putative two-component sensor	PA2571	PA2571	probable two-component sensor
PALES_27221	675.9352345	1.877180058	0.199035401	9.431387841	4.05E-21	7.70E-20	1.877180058	3.673563106	PALES_27221	putative two-component response regulator	PA2572	PA2572	probable two-component response regulator
PALES_27191	137.3623149	-0.948347245	0.24725269	-3.835538635	1.25E-04	3.77E-04	0.948347245	-1.929660767	PALES_27191	putative nitroreductase	PA2575	PA2575	hypothetical protein
PALES_27151	166.7429944	-0.786711729	0.234150716	-3.359851908	7.80E-04	0.002007662	0.786711729	-1.725137948	PALES_27151	putative tryptophan oxygenase	PA2579	kynA	L-Tryptophan:oxygen 2,3-oxidoreductase (decyclizing) KynA
PALES_27131	173.248558	-1.508334657	0.237622653	-6.347604638	2.19E-10	1.47E-09	1.508334657	-2.844814647	PALES_27131	hypothetical protein	PA2581	PA2581	hypothetical protein
PALES_26031	170.3702898	0.75227904	0.244755461	3.073594511	0.002114967	0.004946713	0.75227904	1.684451676	uvrC	excinuclease ABC subunit C	PA2585	uvrC	excinuclease ABC subunit C
PALES_26021	390.9054654	0.942644894	0.202352587	4.658427689	3.19E-06	1.26E-05	0.942644894	1.922048705	gacA	response regulator GacA	PA2586	gacA	response regulator GacA
PALES_26011	206.6775627	-1.314571298	0.232492082	-5.654262657	1.57E-08	8.65E-08	1.314571298	-2.487284091	pqsH	putative FAD-dependent monooxygenase	PA2587	pqsH	probable FAD-dependent monooxygenase
PALES_26001	524.2692765	-1.120899955	0.198440358	-5.648548352	1.62E-08	8.91E-08	1.120899955	-2.174825962	PALES_26001	putative transcriptional regulator	PA2588	PA2588	probable transcriptional regulator
PALES_25961	830.2028815	-1.013042734	0.197404735	-5.131805643	2.87E-07	1.32E-06	1.013042734	-2.018163047	PALES_25961	putative periplasmic spermidine/putrescine-binding protein	PA2592	PA2592	probable periplasmic spermidine/putrescine-binding protein
PALES_25951	22.5086949	-1.244927073	0.414769102	-3.001494243	0.002686581	0.00617135	1.244927073	-2.370065734	PALES_25951	hypothetical protein	PA2593	qteE	quorum threshold expression element, QteE
PALES_25011	857.9426107	0.763276499	0.216079948	3.532380056	4.12E-04	0.00112287	0.763276499	1.697341075	PALES_25011	putative 24K membrane protein	PA2604	PA2604	conserved hypothetical protein
PALES_25001	35.94988355	1.117881698	0.353577339	3.16163276	0.001568873	0.003771481	1.117881698	2.170280772	PALES_25001	sulfur transfer complex subunit TusD	PA2605	PA2605	conserved hypothetical protein
PALES_24991	33.56013039	1.127862568	0.361691779	3.118297492	0.001818991	0.004318174	1.127862568	2.185347292	PALES_24991	sulfur relay protein TusC	PA2606	PA2606	conserved hypothetical protein
PALES_24971	183.0454072	0.89392626	0.245385365	3.64294855	2.70E-04	7.63E-04	0.89392626	1.858226367	PALES_24971	putative desulfoviridin gamma subunit	PA2608	PA2608	conserved hypothetical protein
PALES_24961	218.7254727	1.013932612	0.225938171	4.487655208	7.20E-06	2.68E-05	1.013932612	2.019408267	PALES_24961	glycosyl transferase, family 3	PA2609	PA2609	hypothetical protein
PALES_24951	85.72129533	1.68456202	0.289882554	5.811188007	6.20E-09	3.58E-08	1.68456202	3.214427964	PALES_24951	putative glutathione S-transferase	PA2610	PA2610	conserved hypothetical protein
PALES_24891	365.8530138	-0.773910132	0.237127766	-3.263684161	0.001099737	0.002739261	0.773910132	-1.70989784	trxB1	thioredoxin reductase 1	PA2616	trxB1	thioredoxin reductase 1
PALES_24881	21.60119672	-0.911442117	0.411156009	-2.21677927	0.026638179	0.048124825	0.911442117	-1.88092473	aat	leucyl/phenylalanyl-tRNA--protein transferase	PA2617	aat	leucyl/phenylalanyl-tRNA-protein transferase
PALES_24871	298.4073574	1.069767423	0.224959234	4.755383464	1.98E-06	8.13E-06	1.069767423	2.099094944	PALES_24871	arginyl-tRNA-protein transferase	PA2618	PA2618	hypothetical protein
PALES_24861	382.0730749	-1.864453648	0.247129172	-7.544449859	4.54E-14	4.47E-13	1.864453648	-3.641300105	infA	translation initiation factor IF-1	PA2619	infA	initiation factor
PALES_24841	1365.697231	1.398205171	0.214282169	6.525065415	6.80E-11	4.87E-10	1.398205171	2.635734715	PALES_24841	hypothetical protein	PA2621	clpS	ClpS
PALES_24821	2710.132746	-0.677404547	0.188442544	-3.594753774	3.25E-04	9.06E-04	0.677404547	-1.599260047	icd	isocitrate dehydrogenase	PA2623	icd	isocitrate dehydrogenase
PALES_24761	265.7235253	-2.075925247	0.228518449	-9.084278547	1.04E-19	1.76E-18	2.075925247	-4.21614723	purB	adenylosuccinate lyase	PA2629	purB	adenylosuccinate lyase
PALES_24751	69.33910652	-2.625055999	0.314842977	-8.337667306	7.58E-17	9.76E-16	2.625055999	-6.169082754	PALES_24751	hypothetical protein	PA2630	PA2630	conserved hypothetical protein
PALES_24741	154.1492625	-0.763452294	0.242897466	-3.143105228	0.001671657	0.003998355	0.763452294	-1.697547912	PALES_24741	putative acetyl transferase	PA2631	PA2631	probable acetyl transferase
PALES_24721	173.4573964	1.381141005	0.236357605	5.843437969	5.11E-09	2.99E-08	1.381141005	2.604742947	PALES_24721	putative secretion system protein	PA2633	PA2633	hypothetical protein
PALES_24711	725.0611487	-1.090303578	0.247451712	-4.406126635	1.05E-05	3.80E-05	1.090303578	-2.129188351	aceA	isocitrate lyase	PA2634	aceA	isocitrate lyase AceA
PALES_24701	16.82315788	1.379564004	0.479050822	2.879786319	0.003979448	0.008792878	1.379564004	2.601897275	PALES_24701	putative phosphatase	PA2635	PA2635	hypothetical protein
PALES_24671	572.7752497	-0.779116825	0.193626512	-4.02381274	5.73E-05	1.83E-04	0.779116825	-1.716080018	nuoB	NADH dehydrogenase subunit B	PA2638	nuoB	NADH dehydrogenase I chain B
PALES_24661	576.763782	-1.33589528	0.211189737	-6.32556913	2.52E-10	1.68E-09	1.33589528	-2.524320826	nuoD	bifunctional NADH:ubiquinone oxidoreductase subunit C/D	PA2639	nuoD	NADH dehydrogenase I chain C,D
PALES_24651	60.02495227	-0.937627385	0.291445721	-3.217159547	0.001294666	0.003169998	0.937627385	-1.915375675	nuoE	NADH dehydrogenase subunit E	PA2640	nuoE	NADH dehydrogenase I chain E
PALES_24641	180.6219268	-0.963389079	0.236245108	-4.077921819	4.54E-05	1.49E-04	0.963389079	-1.949885053	nuoF	NADH dehydrogenase I subunit F	PA2641	nuoF	NADH dehydrogenase I chain F
PALES_24631	907.9282935	-1.534422007	0.204346903	-7.508907554	5.96E-14	5.80E-13	1.534422007	-2.896723549	nuoG	NADH dehydrogenase subunit G	PA2642	nuoG	NADH dehydrogenase I chain G
PALES_24621	144.9172048	-0.915961089	0.235623527	-3.887392311	1.01E-04	3.11E-04	0.915961089	-1.886825611	nuoH	NADH dehydrogenase subunit H	PA2643	nuoH	NADH dehydrogenase I chain H
PALES_24611	145.3160242	-0.986121555	0.2371894	-4.157527922	3.22E-05	1.08E-04	0.986121555	-1.980852635	nuoI	NADH dehydrogenase subunit I	PA2644	nuoI	NADH Dehydrogenase I chain I
PALES_24601	60.78299655	-0.779075777	0.286029291	-2.723762222	0.006454296	0.013591752	0.779075777	-1.716031193	nuoJ	NADH dehydrogenase subunit J	PA2645	nuoJ	NADH dehydrogenase I chain J
PALES_24591	32.85933398	-1.338092834	0.359936569	-3.717579564	2.01E-04	5.82E-04	1.338092834	-2.528168874	nuoK	NADH dehydrogenase subunit K	PA2646	nuoK	NADH dehydrogenase I chain K
PALES_24581	163.3229232	-1.287696954	0.254113395	-5.06741077	4.03E-07	1.80E-06	1.287696954	-2.441380147	nuoL	NADH dehydrogenase subunit L	PA2647	nuoL	NADH dehydrogenase I chain L
PALES_24571	82.1418242	-1.352675218	0.310967079	-4.349898467	1.36E-05	4.85E-05	1.352675218	-2.553852526	nuoM	NADH dehydrogenase subunit M	PA2648	nuoM	NADH dehydrogenase I chain M
PALES_24561	94.37533033	-1.348548827	0.26429392	-5.102458768	3.35E-07	1.53E-06	1.348548827	-2.546558443	nuoN	NADH dehydrogenase subunit N	PA2649	nuoN	NADH dehydrogenase I chain N
PALES_24521	157.8510333	0.664358953	0.226223794	2.936733316	0.003316892	0.007463177	0.664358953	1.584863899	PALES_24521	putative chemotaxis transducer	PA2652	PA2652	methyl-accepting chemotaxis protein
PALES_24511	17.23604583	-1.741299686	0.480229855	-3.625971331	2.88E-04	8.10E-04	1.741299686	-3.343362268	PALES_24511	putative transporter	PA2653	PA2653	probable transporter
PALES_24501	184.4249254	1.504858265	0.229639113	6.553144395	5.63E-11	4.08E-10	1.504858265	2.837967888	PALES_24501	putative chemotaxis transducer	PA2654	PA2654	probable chemotaxis transducer
PALES_24481	74.36017422	0.845103976	0.274426853	3.07952362	0.002073319	0.004861259	0.845103976	1.796394208	PALES_24481	putative two-component sensor	PA2656	bqsS	two-component sensor BqsS
PALES_24431	20.93380149	-2.095705684	0.439062009	-4.773142839	1.81E-06	7.47E-06	2.095705684	-4.274351888	PALES_24431	hypothetical protein	PA2661	PA2661	hypothetical protein
PALES_24411	26.80668999	-1.477331986	0.383451072	-3.852726189	1.17E-04	3.53E-04	1.477331986	-2.784333428	ppyR	psl and pyoverdine operon regulator, PpyR	PA2663	ppyR	psl and pyoverdine operon regulator, PpyR
PALES_24221	160.1041126	0.784131713	0.243964498	3.214122217	0.00130844	0.003197138	0.784131713	1.722055587	PALES_24221	putative dienelactone hydrolase	PA2682	PA2682	conserved hypothetical protein
PALES_24211	39.72164147	-1.407914092	0.34150221	-4.122708583	3.74E-05	1.24E-04	1.407914092	-2.653532267	PALES_24211	serine/threonine dehydratase	PA2683	PA2683	probable serine/threonine dehydratase, degradative
PALES_24211	39.72164147	-1.407914092	0.34150221	-4.122708583	3.74E-05	1.24E-04	1.407914092	-2.653532267	PALES_24211	serine/threonine dehydratase	PA2683	tsi5	Tsi5
PALES_24201	166.9681824	-1.927264981	0.245674993	-7.844774735	4.34E-15	4.81E-14	1.927264981	-3.803334903	PALES_24201	hypothetical protein	PA2684	tse5	Tse5
PALES_24191	220.9734519	-1.058577741	0.225682246	-4.690567199	2.72E-06	1.09E-05	1.058577741	-2.082877137	PALES_24191	hypothetical protein	PA2685	vgrG4	VgrG4
PALES_24181	47.85033376	2.358158988	0.363935629	6.479604636	9.20E-11	6.51E-10	2.358158988	5.127156689	pfeR	two-component response regulator PfeR	PA2686	pfeR	two-component response regulator PfeR
PALES_24171	41.10274142	2.543794566	0.394628322	6.446051708	1.15E-10	8.02E-10	2.543794566	5.831207116	pfeS	two-component sensor PfeS	PA2687	pfeS	two-component sensor PfeS
PALES_24161	35.50722946	2.649414594	0.433586374	6.110465541	9.93E-10	6.31E-09	2.649414594	6.2741264	pfeA	outer membrane receptor FepA	PA2688	pfeA	Ferric enterobactin receptor, outer membrane protein PfeA precursor
PALES_24091	28.49326669	-1.409880499	0.393513101	-3.582804471	3.40E-04	9.45E-04	1.409880499	-2.657151522	PALES_24091	putative outer membrane lipoprotein	PA2695	PA2695	conserved hypothetical protein
PALES_24061	34.21582504	-2.388453822	0.376533811	-6.343265206	2.25E-10	1.51E-09	2.388453822	-5.235959078	PALES_24061	putative hydrolase	PA2698	PA2698	probable hydrolase
PALES_24051	37.74747781	-1.551190203	0.394470746	-3.932332676	8.41E-05	2.63E-04	1.551190203	-2.930588088	PALES_24051	putative hydrolase	PA2699	PA2699	hypothetical protein
PALES_24021	81.02515032	-0.60370426	0.2683567	-2.249633642	0.024472211	0.044683046	0.60370426	-1.519613317	PALES_24021	hypothetical protein	PA2702	tse2	Tse2
PALES_24011	42.43144327	-1.202498078	0.336597807	-3.572507167	3.54E-04	9.81E-04	1.202498078	-2.301378181	PALES_24011	hypothetical protein	PA2703	tsi2	Tsi2
PALES_24001	58.7008064	2.525204461	0.33505585	7.53666727	4.82E-14	4.74E-13	2.525204461	5.756550091	PALES_24001	putative transcriptional regulator	PA2704	PA2704	probable transcriptional regulator
PALES_23961	49.60086872	0.964576696	0.333681684	2.89070915	0.003843737	0.00851676	0.964576696	1.951490847	PALES_23961	hypothetical protein	PA2708	PA2708	hypothetical protein
PALES_23931	26.86384333	1.031455837	0.398026298	2.591426349	0.0095579	0.019192489	1.031455837	2.044085917	PALES_23931	putative periplasmic spermidine/putrescine-binding protein	PA2711	PA2711	probable periplasmic spermidine/putrescine-binding protein
PALES_23881	33.16455101	1.0103153	0.367673172	2.747862441	0.005998517	0.012693791	1.0103153	2.014351287	PALES_23881	putative FMN oxidoreductase	PA2716	PA2716	probable FMN oxidoreductase
PALES_23871	106.4423847	1.065835304	0.274777264	3.878906453	1.05E-04	3.22E-04	1.065835304	2.093381573	cpo	chloroperoxidase precursor	PA2717	cpo	chloroperoxidase precursor
PALES_23851	65.64571452	0.750001566	0.288493636	2.599716158	0.00933009	0.018758806	0.750001566	1.681794656	PALES_23851	putative protease	PA2719	PA2719	hypothetical protein
PALES_23841	41.41950666	-0.841871444	0.334772691	-2.514755438	0.011911498	0.023482244	0.841871444	-1.792373677	PALES_23841	hypothetical protein	PA2720	PA2720	hypothetical protein
PALES_23831	64.39799259	0.953176615	0.283829511	3.3582717	7.84E-04	0.002018083	0.953176615	1.936131061	PALES_23831	hypothetical protein	PA2721	PA2721	hypothetical protein
PALES_23821	30.16006217	1.145519515	0.379460034	3.018814661	0.002537657	0.005866096	1.145519515	2.212257799	PALES_23821	hypothetical protein	PA2722	PA2722	hypothetical protein
PALES_23781	11.00599021	-1.455242263	0.54577441	-2.666380537	0.007667285	0.015734977	1.455242263	-2.742026023	PALES_23781	putative radical activating enzyme	PA2726	PA2726	probable radical activating enzyme
PALES_23771	125.0492964	-1.153221361	0.241482808	-4.775583688	1.79E-06	7.39E-06	1.153221361	-2.224099545	PALES_23771	hypothetical protein	PA2727	PA2727	hypothetical protein
PALES_23441	239.1371883	-1.382553122	0.218153784	-6.337516116	2.33E-10	1.57E-09	1.382553122	-2.607293731	pheT	phenylalanyl-tRNA synthetase subunit beta	PA2739	pheT	phenylalanyl-tRNA synthetase, beta subunit
PALES_23431	189.1026099	-1.281778882	0.240257233	-5.33502724	9.55E-08	4.74E-07	1.281778882	-2.431385885	pheS	phenylalanyl-tRNA synthetase, alpha-subunit	PA2740	pheS	phenylalanyl-tRNA synthetase, alpha-subunit
PALES_23421	2586.709519	-1.297572451	0.209996145	-6.179029866	6.45E-10	4.19E-09	1.297572451	-2.458149144	rplT	50S ribosomal protein L20	PA2741	rplT	50S ribosomal protein L20
PALES_23411	2915.734523	-1.302354257	0.199319007	-6.534019386	6.40E-11	4.60E-10	1.302354257	-2.466310184	rpmI	50S ribosomal protein L35	PA2742	rpmI	50S ribosomal protein L35
PALES_23401	4473.511793	-0.68457017	0.258273105	-2.650567003	0.008035679	0.016398992	0.68457017	-1.607223062	infC	translation initiation factor IF-3	PA2743	infC	translation initiation factor IF-3
PALES_23371	118.1677083	2.406205016	0.326860614	7.361563034	1.82E-13	1.71E-12	2.406205016	5.300781289	PALES_23371	hypothetical protein	PA2746	PA2746	hypothetical protein
PALES_23331	81.09057821	2.369010606	0.320069003	7.401562105	1.35E-13	1.28E-12	2.369010606	5.165867377	PALES_23331	putative methionine aminopeptidase	PA2748	PA2748	probable methionine aminopeptidase
PALES_23271	89.6033986	-4.039349435	0.386093002	-10.46211511	1.29E-25	3.76E-24	4.039349435	-16.44240506	PALES_23271	hypothetical protein	PA2753	PA2753	hypothetical protein
PALES_23261	191.7115575	-1.089225911	0.293328669	-3.7133292	2.05E-04	5.92E-04	1.089225911	-2.127598479	PALES_23261	hypothetical protein	PA2754	PA2754	conserved hypothetical protein
PALES_23231	109.8731131	-1.329060156	0.251220403	-5.290414865	1.22E-07	5.96E-07	1.329060156	-2.512389518	eco	ecotin	PA2755	eco	ecotin precursor
PALES_23191	10.27837055	1.353017248	0.592247694	2.284546248	0.022339448	0.041060717	1.353017248	2.554458058	PALES_23191	hypothetical protein	PA2759	PA2759	hypothetical protein
PALES_23181	1958.489792	-2.574844647	0.224587534	-11.46477101	1.98E-30	8.65E-29	2.574844647	-5.958068238	PALES_23181	putative outer membrane protein precursor	PA2760	oprQ	OprQ
PALES_23171	25.02059998	-2.666500459	0.433844235	-6.146216184	7.94E-10	5.11E-09	2.666500459	-6.348872736	PALES_23171	hypothetical protein	PA2761	PA2761	hypothetical protein
PALES_23161	25.33148051	1.636677861	0.426781719	3.834929629	1.26E-04	3.77E-04	1.636677861	3.109489748	PALES_23161	hypothetical protein	PA2762	PA2762	hypothetical protein
PALES_23151	10.87296347	1.568750767	0.616530178	2.544483341	0.010943953	0.02173705	1.568750767	2.966477348	PALES_23151	hypothetical protein	PA2763	PA2763	hypothetical protein
PALES_23111	85.18943709	-1.391563306	0.255471953	-5.447029659	5.12E-08	2.65E-07	1.391563306	-2.623628235	PALES_23111	putative peroxidase	PA2765	PA2765	hypothetical protein
PALES_23101	22.91667541	1.229791301	0.428198653	2.872011135	0.004078686	0.008991262	1.229791301	2.3453306	PALES_23101	putative transcriptional regulator	PA2766	PA2766	probable transcriptional regulator
PALES_23091	8.848568241	3.26569144	0.862197146	3.787638889	1.52E-04	4.50E-04	3.26569144	9.617696765	PALES_23091	putative enoyl-CoA hydratase/isomerase	PA2767	PA2767	probable enoyl-CoA hydratase/isomerase
PALES_23041	215.1042446	0.638230609	0.214543948	2.974824578	0.002931561	0.006676041	0.638230609	1.556419121	PALES_23041	hypothetical protein	PA2771	PA2771	diguanylate cyclase with a self-blocked I-site, Dcsbis
PALES_23001	26.84216428	-1.192091815	0.386535035	-3.084045963	0.00204206	0.00479743	1.192091815	-2.284837899	PALES_23001	hypothetical protein	PA2774	tse4	Tse4
PALES_22991	26.68464197	-1.683396843	0.383607762	-4.388328416	1.14E-05	4.10E-05	1.683396843	-3.211832913	PALES_22991	hypothetical protein	PA2775	tsi4	Tsi4
PALES_22971	79.02651431	0.873103634	0.302297975	2.888221908	0.003874264	0.008572418	0.873103634	1.831598938	PALES_22971	putative transporter, formate/nitrite transporter family	PA2777	PA2777	conserved hypothetical protein
PALES_22961	95.10998943	1.179409958	0.294568552	4.003855642	6.23E-05	1.99E-04	1.179409958	2.264841292	PALES_22961	hypothetical protein	PA2778	PA2778	hypothetical protein
PALES_22951	339.7310979	1.245384925	0.229301444	5.431212732	5.60E-08	2.87E-07	1.245384925	2.370818014	PALES_22951	hypothetical protein	PA2779	PA2779	hypothetical protein
PALES_22941	52.02420839	0.904512776	0.31096381	2.908739688	0.003628889	0.008078355	0.904512776	1.871912209	PALES_22941	putative transcriptional regulator	PA2780	bswR	bacterial swarming regulator BswR
PALES_22871	54.88772427	1.052113265	0.307918513	3.416856153	6.33E-04	0.001665137	1.052113265	2.07356499	cpg2	glutamate carboxypeptidase	PA2787	cpg2	carboxypeptidase G2 precursor
PALES_22841	246.3994831	4.464729159	0.304225978	14.67569992	9.23E-49	1.57E-46	4.464729159	22.08093195	PALES_22841	hypothetical protein	PA2790	PA2790	hypothetical protein
PALES_22811	26.50379211	-2.05133392	0.400837016	-5.117625961	3.09E-07	1.42E-06	2.05133392	-4.144890302	PALES_22811	hypothetical protein	PA2792	PA2792	hypothetical protein
PALES_22801	116.6588502	-1.310972349	0.247244578	-5.302330018	1.14E-07	5.60E-07	1.310972349	-2.481087042	PALES_22801	hypothetical protein	PA2793	PA2793	hypothetical protein
PALES_22751	359.1713171	1.150405825	0.217806387	5.28178186	1.28E-07	6.22E-07	1.150405825	2.219763267	PALES_22751	putative anti-anti-sigma factor	PA2797	PA2797	hypothetical protein
PALES_22731	101.3519977	1.756496613	0.266390485	6.593691272	4.29E-11	3.14E-10	1.756496613	3.378766409	PALES_22731	hypothetical protein	PA2799	PA2799	hypothetical protein
PALES_22661	34.72321057	-1.207418472	0.347902726	-3.470563412	5.19E-04	0.001385078	1.207418472	-2.309240563	queF	7-cyano-7-deazaguanine reductase	PA2806	PA2806	conserved hypothetical protein
PALES_22551	32.21151315	-0.990021606	0.344494171	-2.873841386	0.004055126	0.008947621	0.990021606	-1.986214736	PALES_22551	hypothetical protein	PA2817	PA2817	hypothetical protein
PALES_22451	141.763397	1.225992172	0.272752128	4.494894981	6.96E-06	2.59E-05	1.225992172	2.339162636	PALES_22451	hypothetical protein	PA2820	PA2820	hypothetical protein
PALES_22441	115.0395631	0.774010196	0.246596875	3.13876725	0.001696601	0.004055978	0.774010196	1.710016441	PALES_22441	putative glutathione S-transferase	PA2821	PA2821	probable glutathione S-transferase
PALES_22421	75.94159444	-0.806896566	0.264762221	-3.047627272	0.002306558	0.005357931	0.806896566	-1.749444099	PALES_22421	putative ATPase	PA2823	PA2823	conserved hypothetical protein
PALES_22411	98.72574007	0.948738159	0.29770143	3.186878069	0.001438174	0.003483707	0.948738159	1.9301837	PALES_22411	putative sensor/response regulator hybrid	PA2824	sagS	surface attachment and growth sensor hybrid, SagS
PALES_22401	40.09732006	2.185208769	0.386629322	5.651947855	1.59E-08	8.74E-08	2.185208769	4.547925966	PALES_22401	putative transcriptional regulator	PA2825	ospR	OspR
PALES_22391	130.9283905	2.380717004	0.305600583	7.790289482	6.69E-15	7.24E-14	2.380717004	5.207955077	PALES_22391	putative glutathione peroxidase	PA2826	PA2826	probable glutathione peroxidase
PALES_22381	194.6401751	0.892242159	0.222970877	4.001608519	6.29E-05	2.00E-04	0.892242159	1.85605847	PALES_22381	methionine sulfoxide reductase B	PA2827	PA2827	conserved hypothetical protein
PALES_22371	180.9969844	-1.685854074	0.230590606	-7.311026671	2.65E-13	2.44E-12	1.685854074	-3.217308041	PALES_22371	aminotransferase AlaT	PA2828	PA2828	probable aminotransferase
PALES_22351	419.8032107	1.350732091	0.20954142	6.446134099	1.15E-10	8.02E-10	1.350732091	2.550415127	htpX	heat shock protein HtpX	PA2830	htpX	heat shock protein HtpX
PALES_22341	72.97470154	-1.471822001	0.276212015	-5.328595133	9.90E-08	4.89E-07	1.471822001	-2.773719698	PALES_22341	putative zinc carboxypeptidase	PA2831	PA2831	conserved hypothetical protein
PALES_22311	53.42518868	1.373586489	0.320144143	4.290525125	1.78E-05	6.20E-05	1.373586489	2.591139142	PALES_22311	putative transcriptional regulator	PA2834	PA2834	probable transcriptional regulator
PALES_22231	57.46555375	0.956273126	0.308955954	3.095176233	0.00196696	0.004639332	0.956273126	1.940291115	PALES_22231	enoyl-CoA hydratase	PA2841	PA2841	probable enoyl-CoA hydratase/isomerase
PALES_22211	76.74326799	-0.836074271	0.261403058	-3.198410447	0.001381874	0.003361299	0.836074271	-1.785185843	PALES_22211	putative aldolase	PA2843	PA2843	probable aldolase
PALES_22181	27.35388963	1.486907995	0.397638036	3.739350515	1.84E-04	5.39E-04	1.486907995	2.802876144	PALES_22181	putative transcriptional regulator	PA2846	PA2846	probable transcriptional regulator
PALES_22151	31.82597037	-0.985584333	0.356885628	-2.761625171	0.005751447	0.012219897	0.985584333	-1.980115154	PALES_22151	putative transcriptional regulator	PA2849	ohrR	OhrR
PALES_22141	14.68735399	-2.060467515	0.502403338	-4.101221785	4.11E-05	1.35E-04	2.060467515	-4.171214534	ohr	organic hydroperoxide resistance protein	PA2850	ohr	organic hydroperoxide resistance protein
PALES_22131	958.7073168	-2.343556464	0.247510422	-9.468516288	2.84E-21	5.55E-20	2.343556464	-5.075522906	efp	elongation factor P	PA2851	efp	translation elongation factor P
PALES_22111	5754.05118	-0.928854584	0.269701062	-3.444015299	5.73E-04	0.001514053	0.928854584	-1.903763918	oprI	Outer membrane lipoprotein OprI precursor	PA2853	oprI	Outer membrane lipoprotein OprI precursor
PALES_22041	44.61154781	-0.845284524	0.330680925	-2.556193779	0.010582417	0.021089435	0.845284524	-1.796619035	PALES_22041	hypothetical protein	PA2860	PA2860	hypothetical protein
PALES_22021	60.94793386	0.969436784	0.331537582	2.92406302	0.003454948	0.007745534	0.969436784	1.958076029	lipA	lactonizing lipase precursor	PA2862	lipA	lactonizing lipase precursor
PALES_21971	225.4097379	0.631410045	0.212684762	2.96876015	0.002990039	0.006789701	0.631410045	1.549078274	PALES_21971	putative chemotaxis transducer	PA2867	PA2867	probable chemotaxis transducer
PALES_21961	50.48395904	0.748046224	0.302607103	2.472004846	0.01343577	0.02620471	0.748046224	1.679516797	PALES_21961	hypothetical protein	PA2868	PA2868	hypothetical protein
PALES_21951	68.26525672	1.679153027	0.313323563	5.359166131	8.36E-08	4.17E-07	1.679153027	3.202398903	PALES_21951	hypothetical protein	PA2869	PA2869	hypothetical protein
PALES_21941	96.67694779	2.229937542	0.288902153	7.718660166	1.18E-14	1.23E-13	2.229937542	4.691136701	PALES_21941	putative two-component response regulator	PA2870	PA2870	diguanylate cyclase
PALES_21921	23.24989488	1.042673054	0.433818049	2.403480115	0.01623985	0.030875845	1.042673054	2.060041005	PALES_21921	hypothetical protein	PA2872	PA2872	hypothetical protein
PALES_21891	87.42072957	1.141630559	0.30203774	3.779761294	1.57E-04	4.62E-04	1.141630559	2.206302424	PALES_21891	putative MoxR protein	PA2875	PA2875	conserved hypothetical protein
PALES_21881	21.92914449	-1.383091916	0.414071338	-3.340226161	8.37E-04	0.002137712	1.383091916	-2.608267641	pyrF	orotidine 5'-phosphate decarboxylase	PA2876	pyrF	orotidine 5'-phosphate decarboxylase
PALES_21811	65.37723565	1.050190759	0.343850223	3.054209913	0.002256541	0.005252009	1.050190759	2.070803639	PALES_21811	hypothetical protein	PA2883	PA2883	hypothetical protein
PALES_21801	60.012267	1.001679858	0.310232479	3.228803963	0.001243091	0.003054727	1.001679858	2.002330134	PALES_21801	putative protease	PA2884	PA2884	hypothetical protein
PALES_21781	45.73074129	-1.626058563	0.32495083	-5.004014187	5.61E-07	2.46E-06	1.626058563	-3.086685645	atuA	expressed protein with apparent function in citronellol catabolism	PA2886	atuA	expressed protein with apparent function in citronellol catabolism
PALES_21771	16.32378986	-1.753453133	0.476882524	-3.676907925	2.36E-04	6.73E-04	1.753453133	-3.371646145	atuB	putative dehydrogenase involved in catabolism of citronellol	PA2887	atuB	putative dehydrogenase involved in catabolism of citronellol
PALES_21761	24.49841273	-1.206076733	0.404601734	-2.980898577	0.00287404	0.006563909	1.206076733	-2.307093914	atuC	geranyl-CoA carboxylase, beta-subunit	PA2888	atuC	geranyl-CoA carboxylase, beta-subunit
PALES_21751	31.40262703	-1.45630252	0.372949334	-3.904826703	9.43E-05	0.000291523	1.45630252	-2.744041917	atuD	putative citronellyl-CoA dehydrogenase involved in catabolism of citronellol	PA2889	atvR	atypical virulence-related response regulator AtvR
PALES_21731	31.09448632	-1.905519096	0.393542808	-4.841961421	1.29E-06	5.40E-06	1.905519096	-3.746436753	atuF	geranyl-CoA carboxylase, alpha-subunit (biotin-containing)	PA2891	atuF	geranyl-CoA carboxylase, alpha-subunit (biotin-containing)
PALES_21721	13.17107326	-1.846847936	0.514428407	-3.590097105	3.31E-04	9.21E-04	1.846847936	-3.597134081	atuG	short chain dehydrogenase	PA2892	atuG	GCase, alpha-subunit (biotin-containing)
PALES_21701	146.5018837	1.270100861	0.242265051	5.242608692	1.58E-07	7.57E-07	1.270100861	2.411784261	PALES_21701	hypothetical protein	PA2894	PA2894	hypothetical protein
PALES_21691	130.0478154	1.854717727	0.254669882	7.282831061	3.27E-13	2.96E-12	1.854717727	3.616809787	PALES_21691	hypothetical protein	PA2895	sbrR	SbrR
PALES_21681	157.688935	1.66931905	0.252583754	6.608972355	3.87E-11	2.84E-10	1.66931905	3.18064432	PALES_21681	RNA polymerase sigma factor	PA2896	sbrI	SbrI
PALES_21671	812.2109999	1.705284719	0.206643729	8.25229359	1.55E-16	1.95E-15	1.705284719	3.260932817	PALES_21671	putative transcriptional regulator	PA2897	PA2897	probable transcriptional regulator
PALES_21641	90.79213176	-1.071680606	0.260496319	-4.113995195	3.89E-05	1.28E-04	1.071680606	-2.101880437	PALES_21641	putative outer membrane protein precursor	PA2900	PA2900	probable outer membrane protein precursor
PALES_21631	83.2306329	-0.75271652	0.272519983	-2.762059915	0.005743794	0.012209092	0.75271652	-1.684962543	PALES_21631	putative lipoprotein	PA2901	PA2901	hypothetical protein
PALES_21571	31.71655776	-1.107317746	0.350197045	-3.161984832	0.001566977	0.003770737	1.107317746	-2.154447206	cobL	precorrin-6y-dependent methyltransferase CobL	PA2907	cobL	precorrin-6y-dependent methyltransferase CobL
PALES_21561	19.99261447	-1.073440602	0.440882013	-2.434757082	0.01490179	0.028687454	1.073440602	-2.104446163	cbiD	cobalt-precorrin-6A synthase	PA2908	cbiD	cobalamin biosynthetic protein CbiD
PALES_21531	93.52150546	-3.22113884	0.327145694	-9.84619056	7.12E-23	1.61E-21	3.22113884	-9.325226971	PALES_21531	putative TonB-dependent receptor	PA2911	PA2911	probable TonB-dependent receptor
PALES_21521	9.706748213	-3.057462349	0.69440307	-4.403008107	1.07E-05	3.85E-05	3.057462349	-8.325069687	PALES_21521	putative ATP-binding component of ABC transporter	PA2912	PA2912	probable ATP-binding component of ABC transporter
PALES_21471	77.30538504	1.855546171	0.288917923	6.42239896	1.34E-10	9.26E-10	1.855546171	3.618887277	PALES_21471	putative transcriptional regulator	PA2917	PA2917	probable transcriptional regulator
PALES_21461	53.20101026	0.856643377	0.303962994	2.818248916	0.004828636	0.010479308	0.856643377	1.81082029	PALES_21461	short chain dehydrogenase	PA2918	PA2918	probable short-chain dehydrogenase
PALES_21441	343.3675033	1.899978801	0.221040193	8.595625888	8.28E-18	1.18E-16	1.899978801	3.732077127	PALES_21441	putative chemotaxis transducer	PA2920	PA2920	probable chemotaxis transducer
PALES_21341	35.86904983	1.561445587	0.418465163	3.731363384	1.90E-04	5.56E-04	1.561445587	2.951494364	PALES_21341	putative threonine efflux protein	PA2929	PA2929	hypothetical protein
PALES_21311	12.91496824	3.859861733	0.837428363	4.609184386	4.04E-06	1.57E-05	3.859861733	14.51891494	morB	morphinone reductase	PA2932	morB	morphinone reductase
PALES_21261	267.0040563	1.300178746	0.313225878	4.150930167	3.31E-05	1.11E-04	1.300178746	2.462593917	PALES_21261	hypothetical protein	PA2937	PA2937	hypothetical protein
PALES_21241	3038.926068	-2.004627047	0.235139752	-8.52525798	1.52E-17	2.08E-16	2.004627047	-4.012849494	PALES_21241	putative aminopeptidase	PA2939	PA2939	probable aminopeptidase
PALES_21211	39.25344382	-0.934982428	0.335181067	-2.789484612	0.005279201	0.01132249	0.934982428	-1.911867348	PALES_21211	putative magnesium chelatase	PA2942	PA2942	probable magnesium chelatase
PALES_21201	44.39736164	-0.962064549	0.325441017	-2.956187137	0.00311468	0.007042466	0.962064549	-1.948095697	PALES_21201	phospho-2-dehydro-3-deoxyheptonate aldolase	PA2943	PA2943	phospho-2-dehydro-3-deoxyheptonate aldolase
PALES_21191	144.2433511	-1.241827413	0.233711928	-5.313496086	1.08E-07	5.28E-07	1.241827413	-2.364979065	cobN	cobaltochelatase subunit CobN	PA2944	cobN	cobalamin biosynthetic protein CobN
PALES_21181	201.7161237	-1.219440803	0.218682387	-5.576310109	2.46E-08	1.32E-07	1.219440803	-2.328564433	PALES_21181	putative cobalamin biosynthesis protein cobW	PA2945	PA2945	conserved hypothetical protein
PALES_21131	384.0811847	-2.123686084	0.206015502	-10.30838002	6.46E-25	1.80E-23	2.123686084	-4.358060076	PALES_21131	trans-2-enoyl-CoA reductase	PA2950	pfm	Pfm
PALES_21121	997.4276304	-1.636727618	0.213828985	-7.654376771	1.94E-14	1.98E-13	1.636727618	-3.109596993	etfA	electron transfer flavoprotein alpha-subunit	PA2951	etfA	electron transfer flavoprotein alpha-subunit
PALES_21111	490.8867733	-1.551397824	0.23504277	-6.60049157	4.10E-11	3.00E-10	1.551397824	-2.931009865	etfB	electron transfer flavoprotein beta-subunit	PA2952	etfB	electron transfer flavoprotein beta-subunit
PALES_21101	790.8499351	-1.841258503	0.254952565	-7.221965008	5.12E-13	4.55E-12	1.841258503	-3.583224667	PALES_21101	electron transfer flavoprotein-ubiquinone oxidoreductase	PA2953	PA2953	electron transfer flavoprotein-ubiquinone oxidoreductase
PALES_21071	27.91723798	-1.573398648	0.391354541	-4.02039195	5.81E-05	1.86E-04	1.573398648	-2.976049758	PALES_21071	putative oxidase	PA2956	PA2956	conserved hypothetical protein
PALES_21061	200.2863374	-1.509737961	0.231668578	-6.516800747	7.18E-11	5.13E-10	1.509737961	-2.847583132	PALES_21061	putative transcriptional regulator	PA2957	PA2957	probable transcriptional regulator
PALES_21051	147.5375196	1.251557943	0.242437158	5.162401476	2.44E-07	1.14E-06	1.251557943	2.380984028	PALES_21051	putative selenocysteine lyase	PA2958	PA2958	hypothetical protein
PALES_21041	59.51124649	-0.814459106	0.298728524	-2.726418938	0.006402568	0.013494774	0.814459106	-1.75863868	PALES_21041	putative deoxyribonuclease, TatD family	PA2959	PA2959	conserved hypothetical protein
PALES_20991	52.48502116	-0.868705148	0.324051787	-2.680760249	0.007345512	0.015172854	0.868705148	-1.826023267	pabC	4-amino-4-deoxychorismate lyase	PA2964	pabC	4-amino-4-deoxychorismate lyase
PALES_20981	528.8026023	-1.178450406	0.206737195	-5.700234087	1.20E-08	6.70E-08	1.178450406	-2.263335424	fabF1	3-oxoacyl-(acyl carrier protein) synthase II	PA2965	fabF1	beta-ketoacyl-acyl carrier protein synthase II
PALES_20971	3233.450971	-1.206426146	0.222045469	-5.433239187	5.53E-08	2.85E-07	1.206426146	-2.307652748	acpP	acyl carrier protein	PA2966	acpP	acyl carrier protein
PALES_20961	478.8036381	-2.363270108	0.197515008	-11.96501536	5.42E-33	2.80E-31	2.363270108	-5.145353179	fabG	3-ketoacyl-(acyl-carrier-protein) reductase	PA2967	fabG	3-oxoacyl-[acyl-carrier-protein] reductase
PALES_20951	433.4163922	-2.349166749	0.241700189	-9.719341809	2.49E-22	5.41E-21	2.349166749	-5.095298789	fabD	malonyl-CoA-[acyl-carrier-protein] transacylase	PA2968	fabD	malonyl-CoA-[acyl-carrier-protein] transacylase
PALES_20941	132.7172082	-1.542970757	0.248643899	-6.205544409	5.45E-10	3.57E-09	1.542970757	-2.913939163	plsX	putative glycerol-3-phosphate acyltransferase PlsX	PA2969	plsX	fatty acid biosynthesis protein PlsX
PALES_20931	329.5590182	-2.558333428	0.234855996	-10.8932004	1.24E-27	4.16E-26	2.558333428	-5.890268619	rpmF	50S ribosomal protein L32	PA2970	rpmF	50S ribosomal protein L32
PALES_20921	564.3535964	-1.888010787	0.220157223	-8.575738545	9.85E-18	1.38E-16	1.888010787	-3.701245387	PALES_20921	hypothetical protein	PA2971	PA2971	conserved hypothetical protein
PALES_20851	80.39720904	-0.687679004	0.287598609	-2.391106852	0.016797663	0.031809195	0.687679004	-1.610690168	murB	UDP-N-acetylenolpyruvoylglucosamine reductase	PA2977	murB	UDP-N-acetylpyruvoylglucosamine reductase
PALES_20841	26.98583053	-0.856401913	0.385583604	-2.221053757	0.026347321	0.047635555	0.856401913	-1.810517238	ptpA	phosphotyrosine protein phosphatase	PA2978	ptpA	phosphotyrosine protein phosphatase
PALES_20831	71.23447846	-0.779784915	0.278157378	-2.803394687	0.005056774	0.010894863	0.779784915	-1.716874892	kdsB	3-deoxy-manno-octulosonate cytidylyltransferase	PA2979	kdsB	3-deoxy-manno-octulosonate cytidylyltransferase
PALES_20811	30.78283396	-1.276167029	0.368134383	-3.466579288	5.27E-04	0.001402622	1.276167029	-2.421946553	lpxK	tetraacyldisaccharide 4'-kinase	PA2981	lpxK	tetraacyldisaccharide 4*-kinase
PALES_20801	44.83719995	-1.624280957	0.318286224	-5.103208482	3.34E-07	1.53E-06	1.624280957	-3.08288475	PALES_20801	putative biopolymer transport protein	PA2982	PA2982	conserved hypothetical protein
PALES_20791	30.06662122	-1.034818101	0.367639015	-2.814766824	0.004881264	0.010579038	1.034818101	-2.048855305	PALES_20791	putative tolQ-type transport protein	PA2983	PA2983	probable tolQ-type transport protein
PALES_20761	68.61561568	-0.633693328	0.275293554	-2.301882189	0.021341817	0.039517266	0.633693328	-1.551531867	PALES_20761	putative lipoprotein releasing system, permease protein	PA2986	lolC	lipoprotein localization protein LolC
PALES_20731	101.5971883	1.175164045	0.260990454	4.502708922	6.71E-06	2.50E-05	1.175164045	2.258185567	PALES_20731	hypothetical protein	PA2989	PA2989	hypothetical protein
PALES_20711	268.8738821	-0.895688776	0.208427675	-4.297360105	1.73E-05	6.03E-05	0.895688776	-1.860497918	sth	soluble pyridine nucleotide transhydrogenase	PA2991	sth	soluble pyridine nucleotide transhydrogenase
PALES_20701	44.42365096	-0.837145375	0.328309446	-2.54986686	0.010776406	0.021440089	0.837145375	-1.786511716	PALES_20701	hypothetical protein	PA2992	PA2992	hypothetical protein
PALES_20691	48.48433155	-0.910750578	0.305938899	-2.976903493	0.002911757	0.006634117	0.910750578	-1.880023346	PALES_20691	putative thiamine biosynthesis lipoprotein	PA2993	PA2993	conserved hypothetical protein
PALES_20681	71.78728703	-1.590181187	0.287171205	-5.537397762	3.07E-08	1.63E-07	1.590181187	-3.010871603	nqrF	Na(+)-translocating NADH-quinone reductase subunit F	PA2994	nqrF	Na+-translocating NADH:quinone oxidoreductase, subunit Nqr6
PALES_20671	33.65514312	-1.700260384	0.379405122	-4.481384897	7.42E-06	2.75E-05	1.700260384	-3.249596035	nqrE	Na(+)-translocating NADH-quinone reductase subunit E	PA2995	nqrE	Na+-translocating NADH:quinone oxidoreductase subunit Nqr5
PALES_20661	25.35421899	-1.54204541	0.392844405	-3.925333771	8.66E-05	2.70E-04	1.54204541	-2.912070756	nqrD	Na(+)-translocating NADH-quinone reductase subunit D	PA2996	nqrD	Na+-translocating NADH:uniquinone oxidoreductase subunit Nqr4
PALES_20651	34.77747534	-1.741676803	0.383996375	-4.535659487	5.74E-06	2.16E-05	1.741676803	-3.34423633	nqrC	Na(+)-translocating NADH-quinone reductase subunit C	PA2997	nqrC	Na+-translocating NADH:ubiquinone oxidoreductase subunit Nrq3
PALES_20641	83.94157207	-1.500192432	0.27777488	-5.40074909	6.64E-08	3.35E-07	1.500192432	-2.828804415	nqrB	Na(+)-translocating NADH-quinone reductase subunit B	PA2998	nqrB	Na+-translocating NADH:ubiquinone oxidoreductase subunit Nrq2
PALES_20631	163.4501665	-1.240865313	0.233717759	-5.309247013	1.10E-07	5.40E-07	1.240865313	-2.363402441	nqrA	Na(+)-translocating NADH-quinone reductase subunit A	PA2999	nqrA	Na+-translocating NADH:ubiquinone oxidoreductase subunit Nrq1
PALES_20621	37.12438008	-0.753555572	0.331526287	-2.272988902	0.023026849	0.042242541	0.753555572	-1.685942779	aroP1	aromatic amino acid transport protein AroP1	PA3000	aroP1	aromatic amino acid transport protein AroP1
PALES_20611	1212.239342	-1.586759408	0.203468251	-7.798560206	6.26E-15	6.81E-14	1.586759408	-3.003738892	PALES_20611	glyceraldehyde-3-phosphate dehydrogenase	PA3001	PA3001	probable glyceraldehyde-3-phosphate dehydrogenase
PALES_20601	270.7492456	-0.986162528	0.212342825	-4.644199899	3.41E-06	1.34E-05	0.986162528	-1.980908892	mfd	transcription-repair coupling protein Mfd	PA3002	mfd	transcription-repair coupling protein Mfd
PALES_20591	45.92550638	-1.183103571	0.320209548	-3.694779175	2.20E-04	6.33E-04	1.183103571	-2.270647208	PALES_20591	hypothetical protein	PA3003	PA3003	hypothetical protein
PALES_20581	110.1524963	-1.112816314	0.268684211	-4.141725748	3.45E-05	1.15E-04	1.112816314	-2.162674155	PALES_20581	5'-methylthioadenosine phosphorylase	PA3004	PA3004	5-methylthioadenosine phosphorylase MtnP
PALES_20571	76.75834521	-0.692441361	0.270181836	-2.562871622	0.010381043	0.020722862	0.692441361	-1.616015864	nagZ	beta-hexosaminidase	PA3005	nagZ	beta-N-acetyl-D-glucosaminidase
PALES_20551	420.9860799	1.222128732	0.232306271	5.26085124	1.43E-07	6.93E-07	1.222128732	2.332906895	lexA	LexA repressor	PA3007	lexA	repressor protein LexA
PALES_20541	176.7876984	1.263261894	0.239305582	5.278865134	1.30E-07	6.30E-07	1.263261894	2.400378468	PALES_20541	putative cell division inhibitor	PA3008	PA3008	hypothetical protein
PALES_20531	312.3301635	1.331503645	0.24983757	5.329477246	9.85E-08	4.87E-07	1.331503645	2.516648353	PALES_20531	hypothetical protein	PA3009	PA3009	hypothetical protein
PALES_20521	225.8594066	0.826602257	0.2134354	3.872845167	1.08E-04	3.29E-04	0.826602257	1.773503598	PALES_20521	hypothetical protein	PA3010	PA3010	hypothetical protein
PALES_20501	95.17398229	0.713168747	0.254493072	2.802311042	0.005073793	0.010921632	0.713168747	1.639400959	PALES_20501	hypothetical protein	PA3012	PA3012	hypothetical protein
PALES_20491	286.5147047	-0.9648945	0.205292705	-4.700091517	2.60E-06	1.05E-05	0.9648945	-1.951920778	fadA	3-ketoacyl-CoA thiolase	PA3013	faoB	fatty-acid oxidation complex beta-subunit
PALES_20481	657.4212722	-1.080221458	0.19492363	-5.54176761	2.99E-08	1.59E-07	1.080221458	-2.114360616	fadB	multifunctional fatty acid oxidation complex subunit alpha	PA3014	faoA	fatty-acid oxidation complex alpha-subunit
PALES_20471	50.08584301	0.888459437	0.31058509	2.860599129	0.004228413	0.009291237	0.888459437	1.85119829	PALES_20471	hypothetical protein	PA3015	PA3015	hypothetical protein
PALES_20451	223.0613398	1.378731887	0.268130074	5.142026271	2.72E-07	1.26E-06	1.378731887	2.600396985	PALES_20451	putative universal stress protein	PA3017	PA3017	conserved hypothetical protein
PALES_20441	17.42144996	-1.535702925	0.45388608	-3.383454557	7.16E-04	0.001856864	1.535702925	-2.899296591	PALES_20441	hypothetical protein	PA3018	PA3018	hypothetical protein
PALES_20431	233.3606231	-1.212787622	0.238733293	-5.080094223	3.77E-07	1.70E-06	1.212787622	-2.31785067	PALES_20431	putative ATP-binding component of ABC transporter	PA3019	PA3019	probable ATP-binding component of ABC transporter
PALES_20411	241.4760181	0.808359686	0.236067863	3.424268247	6.16E-04	0.001624864	0.808359686	1.751219211	PALES_20411	putative soluble lytic transglycosylase	PA3020	PA3020	probable soluble lytic transglycosylase
PALES_20401	168.4284346	-0.870233614	0.225861463	-3.852953065	1.17E-04	3.53E-04	0.870233614	-1.827958876	PALES_20401	hypothetical protein	PA3021	PA3021	hypothetical protein
PALES_20361	33.57596972	-1.359213761	0.3504199	-3.878814416	1.05E-04	3.22E-04	1.359213761	-2.565453295	PALES_20361	putative carbohydrate kinase	PA3024	PA3024	probable carbohydrate kinase
PALES_20281	780.7723494	1.845163891	0.252130909	7.318277233	2.51E-13	2.32E-12	1.845163891	3.592937627	snr1	cytochrome c Snr1	PA3032	snr1	cytochrome c Snr1
PALES_20221	276.7888205	-1.29815337	0.217246407	-5.975488321	2.29E-09	1.40E-08	1.29815337	-2.459139146	PALES_20221	putative porin	PA3038	opdQ	OpdQ
PALES_20211	82.68424372	4.842223738	0.477598849	10.13868385	3.72E-24	9.31E-23	4.842223738	28.6849826	PALES_20211	putative transporter	PA3039	PA3039	probable transporter
PALES_20131	274.0609298	1.004903398	0.233710475	4.299779032	1.71E-05	5.97E-05	1.004903398	2.006809118	PALES_20131	putative D-alanyl-D-alanine carboxypeptidase	PA3047	PA3047	probable D-alanyl-D-alanine carboxypeptidase
PALES_20101	3640.628374	1.327255842	0.292499531	4.53763408	5.69E-06	2.15E-05	1.327255842	2.50924935	rmf	ribosome modulation factor	PA3049	rmf	ribosome modulation factor
PALES_20091	128.8057147	-1.050167316	0.235022508	-4.468369124	7.88E-06	2.90E-05	1.050167316	-2.070769991	pyrD	dihydroorotate dehydrogenase 2	PA3050	pyrD	dihydroorotate dehydrogenase
PALES_20061	93.57941757	-3.014547195	0.29559203	-10.19833721	2.02E-24	5.36E-23	3.014547195	-8.081074845	PALES_20061	putative carboxypeptidase	PA3054	PA3054	hypothetical protein
PALES_19961	12.27661287	1.41201027	0.547135875	2.580730554	0.00985915	0.019755692	1.41201027	2.661077026	pelA	hypothetical protein	PA3064	pelA	PelA
PALES_19811	112.6596633	-0.715161303	0.280011751	-2.554040324	0.010648092	0.021211428	0.715161303	-1.641666757	PALES_19811	putative export protein	PA3079	PA3079	hypothetical protein
PALES_19791	34.63044104	-1.790505689	0.40276016	-4.44558789	8.77E-06	3.20E-05	1.790505689	-3.459361277	PALES_19791	hypothetical protein	PA3081	PA3081	conserved hypothetical protein
PALES_19781	112.3111727	-1.700031947	0.313013054	-5.43118546	5.60E-08	2.87E-07	1.700031947	-3.249081532	gbt	glycine betaine transmethylase	PA3082	gbt	glycine betaine transmethylase
PALES_19711	76.98859027	1.63914954	0.292603568	5.601946521	2.12E-08	1.16E-07	1.63914954	3.114821608	PALES_19711	hypothetical protein	PA3089	PA3089	hypothetical protein
PALES_19691	128.2825606	-0.761316389	0.258015457	-2.950661937	0.003170938	0.007152661	0.761316389	-1.695036558	PALES_19691	hypothetical protein	PA3091	PA3091	hypothetical protein
PALES_19681	38.05635574	-1.592280604	0.393683388	-4.044571477	5.24E-05	1.70E-04	1.592280604	-3.015256228	fadH1	2,4-dienoyl-CoA reductase FadH1	PA3092	fadH1	2,4-dienoyl-CoA reductase FadH1
PALES_19601	42.96845307	-0.840247199	0.355580437	-2.363029882	0.018126208	0.034175305	0.840247199	-1.790356885	xcpU	General secretion pathway outer membrane protein H precursor	PA3100	xcpU	General secretion pathway outer membrane protein H precursor
PALES_19591	266.1765024	-0.853896191	0.244432353	-3.493384484	4.77E-04	0.001284171	0.853896191	-1.807375399	xcpT	general secretion pathway protein G	PA3101	xcpT	general secretion pathway protein G
PALES_19551	541.4303432	-1.308028529	0.238713597	-5.479488996	4.27E-08	2.22E-07	1.308028529	-2.476029545	xcpQ	general secretion pathway protein D	PA3105	xcpQ	general secretion pathway protein D
PALES_19541	66.88146653	-1.117584728	0.277179702	-4.031986176	5.53E-05	1.78E-04	1.117584728	-2.169834079	PALES_19541	oxidoreductase	PA3106	PA3106	probable short-chain dehydrogenase
PALES_19531	220.8607723	-0.961812775	0.220172232	-4.368456308	1.25E-05	4.47E-05	0.961812775	-1.947755751	metZ	o-succinylhomoserine sulfhydrylase	PA3107	metZ	o-succinylhomoserine sulfhydrylase
PALES_19521	399.5772574	-0.661039025	0.220648172	-2.995896229	0.002736395	0.006276681	0.661039025	-1.581221005	purF	amidophosphoribosyltransferase	PA3108	purF	amidophosphoribosyltransferase
PALES_19501	130.8690423	-0.651028575	0.259438003	-2.509380147	0.012094325	0.02381305	0.651028575	-1.57028734	PALES_19501	putative DedD protein	PA3110	PA3110	hypothetical protein
PALES_19491	185.0176529	-1.259990436	0.248058195	-5.079414679	3.79E-07	1.70E-06	1.259990436	-2.394941532	folC	folylpolyglutamate synthetase	PA3111	folC	folylpolyglutamate synthetase
PALES_19481	155.2026709	-2.043846272	0.25082658	-8.148443726	3.69E-16	4.44E-15	2.043846272	-4.123433873	accD	acetyl-CoA carboxylase subunit beta	PA3112	accD	acetyl-CoA carboxylase beta subunit
PALES_19451	28.3061927	-0.870995662	0.363230651	-2.397913446	0.016488761	0.031311525	0.870995662	-1.828924679	truA	tRNA pseudouridine synthase A	PA3114	truA	tRNA-pseudouridine synthase I
PALES_19441	956.8316749	-1.010577022	0.200820469	-5.032241112	4.85E-07	2.15E-06	1.010577022	-2.014716748	fimV	Motility protein FimV	PA3115	fimV	Motility protein FimV
PALES_19411	160.2458995	0.768434847	0.236677852	3.246754351	0.001167291	0.002896904	0.768434847	1.703420772	leuB	3-isopropylmalate dehydrogenase	PA3118	leuB	3-isopropylmalate dehydrogenase
PALES_19401	72.96805772	1.501236134	0.284358178	5.279384421	1.30E-07	6.29E-07	1.501236134	2.830851623	PALES_19401	putative biotin synthesis protein	PA3119	PA3119	conserved hypothetical protein
PALES_19391	130.5972304	1.159356749	0.245095914	4.73021656	2.24E-06	9.12E-06	1.159356749	2.233578174	leuD	isopropylmalate isomerase small subunit	PA3120	leuD	3-isopropylmalate dehydratase small subunit
PALES_19381	512.9271335	1.840585292	0.269575402	6.827719743	8.63E-12	6.77E-11	1.840585292	3.581553001	leuC	isopropylmalate isomerase large subunit	PA3121	leuC	3-isopropylmalate dehydratase large subunit
PALES_19351	54.83753225	0.877040209	0.296327323	2.959700782	0.00307938	0.006969277	0.877040209	1.836603511	PALES_19351	putative transcriptional regulator	PA3124	PA3124	probable transcriptional regulator
PALES_19341	30.15759147	-1.064064748	0.408626174	-2.604005359	0.009214132	0.018564913	1.064064748	-2.090814033	PALES_19341	putative secreted protein	PA3125	PA3125	hypothetical protein
PALES_19331	3070.742191	1.974382773	0.252805857	7.809877506	5.72E-15	6.30E-14	1.974382773	3.929600837	ibpA	heat-shock protein IbpA	PA3126	ibpA	heat-shock protein IbpA
PALES_19301	24.5024223	-1.424687977	0.406488023	-3.504870739	4.57E-04	0.001236324	1.424687977	-2.68456433	PALES_19301	putative tRNA-dihydrouridine synthase	PA3129	PA3129	conserved hypothetical protein
PALES_19271	17.78768163	1.424199418	0.487160746	2.923469164	0.003461545	0.007756667	1.424199418	2.683655376	PALES_19271	putative hydrolase	PA3132	PA3132	probable hydrolase
PALES_19261	12.83663997	1.947382842	0.57405285	3.392340694	6.93E-04	0.001805551	1.947382842	3.856742543	PALES_19261	putative transcriptional regulator	PA3133	sawR	SawR
PALES_19251	317.4857696	-1.141564079	0.205880268	-5.544795972	2.94E-08	1.57E-07	1.141564079	-2.20620076	gltX	glutamyl-tRNA synthetase	PA3134	gltX	glutamyl-tRNA synthetase
PALES_19241	36.91269751	0.96034611	0.357032649	2.689799135	0.007149504	0.014813024	0.96034611	1.945776641	PALES_19241	putative transcriptional regulator	PA3135	PA3135	probable transcriptional regulator
PALES_19231	29.04197451	-1.257672088	0.38844326	-3.237724058	0.001204873	0.002973104	1.257672088	-2.391096057	PALES_19231	putative secretion protein	PA3136	PA3136	probable secretion protein
PALES_19201	685.1996557	-1.078798404	0.220512334	-4.892236106	9.97E-07	4.23E-06	1.078798404	-2.11227607	PALES_19201	aromatic amino acid aminotransferase	PA3139	PA3139	probable amino acid aminotransferase
PALES_19091	19.3217604	-7.186002343	1.234397247	-5.8214666	5.83E-09	3.39E-08	7.186002343	-145.6137056	PALES_19091	UDP-glucose/GDP-mannose dehydrogenase-like protein	PA3159	wbpA	UDP-N-acetyl-d-glucosamine 6-Dehydrogenase
PALES_19071	41.12177593	-0.991119374	0.326681575	-3.03390044	0.002414141	0.005594171	0.991119374	-1.987726652	ihfB	integration host factor subunit beta	PA3161	himD	integration host factor beta subunit
PALES_19061	5848.42417	-1.265059321	0.19741571	-6.408098518	1.47E-10	1.01E-09	1.265059321	-2.40337092	rpsA	30S ribosomal protein S1	PA3162	rpsA	30S ribosomal protein S1
PALES_19051	141.8356278	-0.736686171	0.238178962	-3.092994293	0.001981479	0.004668947	0.736686171	-1.666343896	cmk	cytidylate kinase	PA3163	cmk	cytidylate kinase
PALES_19031	156.5982367	-0.682851357	0.220769903	-3.093045509	0.001981138	0.004668947	0.682851357	-1.605309371	hisC2	histidinol-phosphate aminotransferase	PA3165	hisC2	histidinol-phosphate aminotransferase
PALES_19021	395.626932	-0.661874049	0.229116014	-2.888816184	0.00386695	0.008560219	0.661874049	-1.582136472	pheA	chorismate mutase	PA3166	pheA	chorismate mutase
PALES_19011	402.9115392	-0.642078645	0.206169919	-3.114317784	0.001843708	0.004365952	0.642078645	-1.560576029	serC	phosphoserine aminotransferase	PA3167	serC	3-phosphoserine aminotransferase
PALES_18991	104.4579225	-1.119574275	0.246464674	-4.542534455	5.56E-06	2.10E-05	1.119574275	-2.17282845	mtnA	methylthioribose-1-phosphate isomerase	PA3169	PA3169	5-methylthioribose-1-phosphate isomerase MtnA
PALES_18971	61.40931309	-0.836258579	0.279308176	-2.994035445	0.00275314	0.006312044	0.836258579	-1.78541392	ubiG	3-demethylubiquinone-9 3-methyltransferase	PA3171	ubiG	3-demethylubiquinone-9 3-methyltransferase
PALES_18961	46.1626267	-0.949648662	0.315838266	-3.006756189	0.002640515	0.006071396	0.949648662	-1.931402248	PALES_18961	phosphoglycolate phosphatase	PA3172	PA3172	probable hydrolase
PALES_18951	58.43671722	-0.966656934	0.292591619	-3.303775203	9.54E-04	0.002407126	0.966656934	-1.954306753	PALES_18951	short chain dehydrogenase	PA3173	PA3173	probable short-chain dehydrogenase
PALES_18891	176.2922472	-1.017424352	0.21868256	-4.652517106	3.28E-06	1.30E-05	1.017424352	-2.02430174	PALES_18891	putative pseudouridine synthase	PA3179	PA3179	conserved hypothetical protein
PALES_18881	41.46877431	1.322260733	0.342395357	3.861795157	1.13E-04	3.42E-04	1.322260733	2.500576484	PALES_18881	putative 7,8-dihydro-8-oxoguanine-triphosphatase	PA3180	PA3180	hypothetical protein
PALES_18831	146.5867727	0.726135556	0.240613746	3.017847352	0.002545771	0.005879136	0.726135556	1.654202159	PALES_18831	putative aldose 1-epimerase	PA3185	PA3185	hypothetical protein
PALES_18821	89.87186328	-0.839189125	0.347369232	-2.415841844	0.015698879	0.029991228	0.839189125	-1.789044317	oprB	Glucose/carbohydrate outer membrane porin OprB precursor	PA3186	oprB	Glucose/carbohydrate outer membrane porin OprB precursor
PALES_18811	60.75490185	-1.502427972	0.329520491	-4.559437167	5.13E-06	1.96E-05	1.502427972	-2.833191211	PALES_18811	putative ATP-binding component of ABC transporter	PA3187	PA3187	probable ATP-binding component of ABC transporter
PALES_18801	13.96810547	-1.44687825	0.51706437	-2.798255566	0.005137944	0.011039731	1.44687825	-2.726175142	PALES_18801	putative permease of ABC sugar transporter	PA3188	PA3188	probable permease of ABC sugar transporter
PALES_18791	12.67066778	-1.568833286	0.538296227	-2.914442287	0.003563247	0.007962048	1.568833286	-2.96664703	PALES_18791	putative permease of ABC sugar transporter	PA3189	PA3189	probable permease of ABC sugar transporter
PALES_18781	271.1912099	-0.887697836	0.240580835	-3.6898111	2.24E-04	0.000643231	0.887697836	-1.850221297	PALES_18781	putative binding protein component of ABC sugar transporter	PA3190	PA3190	probable binding protein component of ABC sugar transporter
PALES_18761	147.1790874	-0.608245867	0.238562029	-2.549634026	0.010783605	0.021445438	0.608245867	-1.524404601	gltR	two-component response regulator GltR	PA3192	gltR	two-component response regulator GltR
PALES_18691	79.17356797	0.980967395	0.268008959	3.660203747	2.52E-04	7.17E-04	0.980967395	1.973788484	PALES_18691	hypothetical protein	PA3198	PA3198	conserved hypothetical protein
PALES_18671	95.82513352	1.248602835	0.281905641	4.429151647	9.46E-06	3.44E-05	1.248602835	2.376111991	PALES_18671	putative PHP domain protein	PA3200	PA3200	conserved hypothetical protein
PALES_18591	16.7841501	-1.356716414	0.488484421	-2.777399555	0.005479577	0.011689273	1.356716414	-2.561016262	PALES_18591	putative nitroreductase family protein	PA3208	PA3208	conserved hypothetical protein
PALES_18571	22.69781086	-1.312038194	0.399315876	-3.285715072	0.001017239	0.002555187	1.312038194	-2.482920715	trkH	potassium uptake protein TrkH	PA3210	trkH	potassium uptake protein TrkH
PALES_18511	70.63249542	0.656480111	0.29631858	2.215453754	0.026728935	0.048233809	0.656480111	1.576232235	PALES_18511	hypothetical protein	PA3216	PA3216	hypothetical protein
PALES_18461	21.2060074	-1.098017635	0.428882318	-2.560183971	0.010461677	0.020866305	1.098017635	-2.140603563	csaA	CsaA protein	PA3221	csaA	CsaA protein
PALES_18451	14.97824835	-1.569098379	0.521655991	-3.007917875	0.002630442	0.006054091	1.569098379	-2.967192197	PALES_18451	putative permease	PA3222	PA3222	hypothetical protein
PALES_18371	40.14573969	0.807781885	0.33426772	2.416571615	0.015667444	0.029943206	0.807781885	1.750517986	PALES_18371	hypothetical protein	PA3230	PA3230	conserved hypothetical protein
PALES_18311	154.7172477	4.350055826	0.344419428	12.63011162	1.44E-36	1.09E-34	4.350055826	20.39375917	PALES_18311	putative glycine betaine-binding protein precursor	PA3236	betX	BetX
PALES_18241	141.5255159	-1.188065208	0.277678069	-4.278570541	1.88E-05	6.53E-05	1.188065208	-2.278469736	minC	septum formation inhibitor	PA3243	minC	cell division inhibitor MinC
PALES_18231	654.8670275	-1.860983911	0.198905191	-9.356135465	8.27E-21	1.54E-19	1.860983911	-3.63255316	minD	cell division inhibitor MinD	PA3244	minD	cell division inhibitor MinD
PALES_18221	173.8190781	-1.636652845	0.229731792	-7.124189614	1.05E-12	9.02E-12	1.636652845	-3.109435831	minE	cell division topological specificity factor MinE	PA3245	minE	cell division topological specificity factor MinE
PALES_18211	37.31233433	-1.716316545	0.341388111	-5.027464308	4.97E-07	2.19E-06	1.716316545	-3.285963705	rluA	pseudouridine synthase RluA	PA3246	rluA	pseudouridine synthase RluA
PALES_18191	27.35978502	1.289768951	0.39132379	3.295912452	9.81E-04	0.002470751	1.289768951	2.444888973	PALES_18191	putative ribosomal-protein-serine acetyltransferase	PA3248	PA3248	Uncharacterized protein
PALES_18181	43.95138263	0.791811611	0.337014571	2.349487765	0.018799262	0.035290363	0.791811611	1.731247048	PALES_18181	putative transcriptional regulator	PA3249	PA3249	probable transcriptional regulator
PALES_18171	238.5409778	1.650416947	0.234362897	7.042142624	1.89E-12	1.59E-11	1.650416947	3.13924352	PALES_18171	putative ABC transporter, periplasmic substrate-binding protein	PA3250	PA3250	hypothetical protein
PALES_18161	47.1235536	1.741647604	0.345776407	5.03691857	4.73E-07	2.10E-06	1.741647604	3.344168645	PALES_18161	hypothetical protein	PA3251	PA3251	hypothetical protein
PALES_18151	43.92469204	2.091539356	0.369186359	5.665267165	1.47E-08	8.15E-08	2.091539356	4.262025888	PALES_18151	putative permease of ABC transporter	PA3252	PA3252	probable permease of ABC transporter
PALES_18141	12.09976404	2.527290225	0.659786776	3.830465107	1.28E-04	3.83E-04	2.527290225	5.76487859	PALES_18141	putative permease of ABC transporter	PA3253	PA3253	probable permease of ABC transporter
PALES_18131	58.37143116	1.109793272	0.31894988	3.47952246	5.02E-04	0.001344106	1.109793272	2.158147203	PALES_18131	putative ATP-binding component of ABC transporter	PA3254	PA3254	probable ATP-binding component of ABC transporter
PALES_18121	68.37411319	0.833143104	0.280654602	2.968570967	0.00299188	0.006790639	0.833143104	1.78156251	PALES_18121	putative HAD-superfamily hydrolase	PA3255	PA3255	hypothetical protein
PALES_18101	1970.774627	1.217883066	0.213462419	5.705374613	1.16E-08	6.52E-08	1.217883066	2.326051544	prc	periplasmic tail-specific protease	PA3257	algO	AlgO
PALES_18091	20.06401631	1.930572161	0.488882918	3.948945831	7.85E-05	2.47E-04	1.930572161	3.812063526	PALES_18091	putative EAL domain/GGDEF domain protein	PA3258	PA3258	hypothetical protein
PALES_18051	459.9873528	-1.478973922	0.223203532	-6.626122406	3.45E-11	2.55E-10	1.478973922	-2.787504089	PALES_18051	putative peptidyl-prolyl cis-trans isomerase, FkbP-type	PA3262	PA3262	probable peptidyl-prolyl cis-trans isomerase, FkbP-type
PALES_18041	28.32969511	-1.139879072	0.373134324	-3.054875949	0.002251536	0.005242926	1.139879072	-2.203625515	rdgC	recombination associated protein	PA3263	PA3263	conserved hypothetical protein
PALES_18011	2411.920646	1.23430087	0.320267953	3.853963095	1.16E-04	3.52E-04	1.23430087	2.352673092	capB	cold acclimation protein B	PA3266	capB	cold acclimation protein B
PALES_18001	81.333564	-0.753735996	0.269343792	-2.798416074	0.005135391	0.011039234	0.753735996	-1.686153637	PALES_18001	putative acetyltransferase	PA3267	PA3267	hypothetical protein
PALES_17991	54.72988134	-0.712338692	0.289499262	-2.460588968	0.013870918	0.026942898	0.712338692	-1.638458	PALES_17991	putative TonB-dependent receptor	PA3268	PA3268	probable TonB-dependent receptor
PALES_17951	268.460403	2.18269008	0.247747275	8.810147692	1.25E-18	1.91E-17	2.18269008	4.53999302	PALES_17951	putative ATP-dependent DNA helicase	PA3272	PA3272	probable ATP-dependent DNA helicase
PALES_17941	29.21567399	1.006241957	0.387352278	2.597743745	0.009383849	0.01885892	1.006241957	2.008671936	PALES_17941	hypothetical protein	PA3273	PA3273	hypothetical protein
PALES_17931	28.80861271	1.648396995	0.43420072	3.796393969	1.47E-04	4.35E-04	1.648396995	3.134851266	PALES_17931	hypothetical protein	PA3274	PA3274	hypothetical protein
PALES_17861	14.35248416	1.591471931	0.56233864	2.830095283	0.004653414	0.010131403	1.591471931	3.013566563	oprO	Pyrophosphate-specific outer membrane porin OprO precursor	PA3280	oprO	Pyrophosphate-specific outer membrane porin OprO precursor
PALES_17831	53.92916403	-1.043093002	0.333173306	-3.130782039	0.001743415	0.004153276	1.043093002	-2.060640741	PALES_17831	hypothetical protein	PA3283	PA3283	conserved hypothetical protein
PALES_17821	57.98668864	-0.929856868	0.301975214	-3.079248971	0.002075232	0.004863345	0.929856868	-1.90508698	PALES_17821	hypothetical protein	PA3284	PA3284	hypothetical protein
PALES_17791	241.2921715	-0.719838223	0.214632733	-3.353813809	7.97E-04	0.002045342	0.719838223	-1.646997337	PALES_17791	3-oxoacyl-(acyl carrier protein) synthase III	PA3286	PA3286	hypothetical protein
PALES_17761	65.2613434	0.897997345	0.293394829	3.060712929	0.002208107	0.005151888	0.897997345	1.863477429	PALES_17761	hypothetical protein	PA3289	PA3289	hypothetical protein
PALES_17741	24.54373656	-2.580580401	0.478076578	-5.39783901	6.74E-08	3.40E-07	2.580580401	-5.981803011	PALES_17741	hypothetical protein	PA3291	tli1	Tli1
PALES_17721	173.7532704	-3.015399947	0.269645719	-11.18282152	4.95E-29	1.90E-27	3.015399947	-8.085852839	PALES_17721	hypothetical protein	PA3294	vgrG4a	VgrG4a
PALES_17671	492.1170157	-1.118930433	0.221955445	-5.041238937	4.63E-07	2.06E-06	1.118930433	-2.171858983	fadD1	acyl-CoA synthetase	PA3299	fadD1	long-chain-fatty-acid--CoA ligase
PALES_17651	128.2517959	-0.956983118	0.256856509	-3.72574992	1.95E-04	5.66E-04	0.956983118	-1.941246224	PALES_17651	putative lysophospholipase	PA3301	PA3301	hypothetical protein
PALES_17641	117.4062926	-1.805772125	0.249870035	-7.226845446	4.94E-13	4.40E-12	1.805772125	-3.496162217	phaJ1	(R)-specific enoyl-CoA hydratase	PA3302	PA3302	conserved hypothetical protein
PALES_17621	38.92032804	1.395331849	0.354693135	3.93391276	8.36E-05	2.61E-04	1.395331849	2.630490516	PALES_17621	putative membrane fusion protein	PA3304	PA3304	conserved hypothetical protein
PALES_17611	64.70259093	1.134152018	0.317482678	3.572327234	3.54E-04	9.81E-04	1.134152018	2.194895141	PALES_17611	hypothetical protein	PA3305	PA3305	hypothetical protein
PALES_17601	40.90483741	1.040891035	0.338208505	3.077660728	0.002086323	0.004886929	1.040891035	2.05749801	alkB	putative alkylated DNA repair protein	PA3306	PA3306	hypothetical protein
PALES_17591	85.17773858	1.161841061	0.268310636	4.330208736	1.49E-05	5.26E-05	1.161841061	2.237427695	PALES_17591	hypothetical protein	PA3307	PA3307	hypothetical protein
PALES_17581	202.2081175	-2.429118423	0.227728469	-10.66673145	1.46E-26	4.47E-25	2.429118423	-5.385642336	hepA	ATP-dependent helicase HepA	PA3308	hepA	RNA helicase HepA
PALES_17561	3653.224924	-4.307088455	0.241485219	-17.83582646	3.73E-71	1.61E-68	4.307088455	-19.79533332	PALES_17561	hypothetical protein	PA3309	PA3309	conserved hypothetical protein
PALES_17551	46.79151054	-0.95513329	0.308993287	-3.091113396	0.001994075	0.004695973	0.95513329	-1.938758746	PALES_17551	hypothetical protein	PA3310	PA3310	conserved hypothetical protein
PALES_17541	130.1398686	1.858906438	0.269848334	6.888708219	5.63E-12	4.50E-11	1.858906438	3.627326069	PALES_17541	hypothetical protein	PA3311	nbdA	NbdA
PALES_17521	217.2613011	-1.494805084	0.252076494	-5.929966175	3.03E-09	1.82E-08	1.494805084	-2.818260721	PALES_17521	putative ABC-type phosphate/phosphonate transport system, periplasmic component	PA3313	PA3313	hypothetical protein
PALES_17511	24.01782279	-1.028100876	0.415115276	-2.47666356	0.013261685	0.025907687	1.028100876	-2.039337956	PALES_17511	putative ATP-binding component of ABC transporter	PA3314	PA3314	probable ATP-binding component of ABC transporter
PALES_17471	13.4082626	1.240360324	0.539603154	2.298652841	0.02152466	0.039809319	1.240360324	2.36257532	PALES_17471	hypothetical protein	PA3318	PA3318	hypothetical protein
PALES_17461	22.78586824	1.092110398	0.410747976	2.658833304	0.007841175	0.016043368	1.092110398	2.1318566	plcN	non-hemolytic phospholipase C precursor	PA3319	plcN	non-hemolytic phospholipase C precursor
PALES_17371	372.791573	-2.29763594	0.251595177	-9.13227339	6.71E-20	1.14E-18	2.29763594	-4.916514643	PALES_17371	putative non-ribosomal peptide synthetase	PA3327	PA3327	probable non-ribosomal peptide synthetase
PALES_17361	46.82916163	-3.043592899	0.37895984	-8.031439153	9.63E-16	1.11E-14	3.043592899	-8.245419522	PALES_17361	putative FAD-dependent monooxygenase	PA3328	PA3328	probable FAD-dependent monooxygenase
PALES_17351	110.8552911	-3.597727326	0.317193021	-11.3423912	8.09E-30	3.35E-28	3.597727326	-12.10664594	PALES_17351	hypothetical protein	PA3329	PA3329	hypothetical protein
PALES_17341	66.7727296	-3.48843617	0.343520382	-10.15496125	3.15E-24	7.97E-23	3.48843617	-11.22338666	PALES_17341	putative short chain dehydrogenase	PA3330	PA3330	probable short chain dehydrogenase
PALES_17331	139.0273253	-3.538679566	0.285483913	-12.39537294	2.77E-35	1.73E-33	3.538679566	-11.62113896	PALES_17331	cytochrome P450	PA3331	PA3331	cytochrome P450
PALES_17321	53.01180249	-4.560547795	0.437294909	-10.42899816	1.83E-25	5.14E-24	4.560547795	-23.59726572	PALES_17321	putative isomerase	PA3332	PA3332	conserved hypothetical protein
PALES_17311	62.81270622	-3.704456113	0.362120892	-10.22988784	1.46E-24	3.91E-23	3.704456113	-13.03624181	fabH2	3-oxoacyl-(acyl carrier protein) synthase III	PA3333	fabH2	3-oxoacyl-[acyl-carrier-protein] synthase III
PALES_17301	15.11234552	-2.748025389	0.53846526	-5.103440452	3.34E-07	1.52E-06	2.748025389	-6.717970168	PALES_17301	putative acyl carrier protein	PA3334	acp3	Acp3
PALES_17291	52.29567413	-2.989451562	0.346639402	-8.624096229	6.46E-18	9.22E-17	2.989451562	-7.941720359	PALES_17291	hypothetical protein	PA3335	PA3335	hypothetical protein
PALES_17281	15.09042153	-2.530583997	0.560742328	-4.512917734	6.39E-06	2.39E-05	2.530583997	-5.778055242	PALES_17281	putative major facilitator superfamily (MFS) transporter	PA3336	PA3336	probable major facilitator superfamily (MFS) transporter
PALES_17271	179.7569321	-3.980231567	0.301164501	-13.21613787	7.08E-40	6.01E-38	3.980231567	-15.78225628	rfaD	ADP-L-glycero-D-mannoheptose 6-epimerase	PA3337	rfaD	ADP-L-glycero-D-mannoheptose 6-epimerase
PALES_17251	30.06347873	-0.988175756	0.360316405	-2.742522247	0.006096932	0.012896313	0.988175756	-1.983675108	PALES_17251	hypothetical protein	PA3339	plpD	patatin-like protein, PlpD
PALES_17241	242.4224903	2.232098297	0.250556373	8.908567234	5.17E-19	8.25E-18	2.232098297	4.69816798	PALES_17241	putative Tfp pilus assembly protein FimV	PA3340	PA3340	hypothetical protein
PALES_17201	195.396709	-1.151852425	0.219993435	-5.235849089	1.64E-07	7.84E-07	1.151852425	-2.221990156	recQ	ATP-dependent DNA helicase RecQ	PA3344	recQ	ATP-dependent DNA helicase RecQ
PALES_17181	294.1383892	0.920977862	0.220878467	4.16961361	3.05E-05	1.03E-04	0.920977862	1.893398208	PALES_17181	putative two-component response regulator	PA3346	hsbR	HptB-dependent secretion and biofilm regulator HsbR
PALES_17171	273.0011169	0.727900033	0.22359155	3.255489903	0.001131969	0.002813651	0.727900033	1.656226556	PALES_17171	putative anti-sigma F factor antagonist	PA3347	hsbA	HptB-dependent secretion and biofilm anti anti-sigma factor HsbA
PALES_17161	417.8725686	1.47419824	0.211809388	6.960023148	3.40E-12	2.76E-11	1.47419824	2.77829201	PALES_17161	putative chemotaxis protein methyltransferase	PA3348	PA3348	probable chemotaxis protein methyltransferase
PALES_17151	1674.747649	1.243306906	0.193495497	6.425508221	1.31E-10	9.08E-10	1.243306906	2.36740561	PALES_17151	putative chemotaxis protein	PA3349	PA3349	probable chemotaxis protein
PALES_17141	123.3694383	0.734169951	0.269650829	2.722668996	0.00647569	0.013622037	0.734169951	1.66344014	flgA	flagellar basal body P-ring biosynthesis protein FlgA	PA3350	PA3350	hypothetical protein
PALES_17131	1222.941105	1.019423808	0.229951703	4.433208341	9.28E-06	3.38E-05	1.019423808	2.027109199	flgM	FlgM	PA3351	flgM	FlgM
PALES_17121	486.1746879	0.8644393	0.209120186	4.133696108	3.57E-05	1.19E-04	0.8644393	1.820631946	flgN	putative export chaperone involved in flagellar synthesis	PA3352	PA3352	hypothetical protein
PALES_17101	58.56542322	1.332604725	0.319123055	4.175833441	2.97E-05	1.00E-04	1.332604725	2.518569818	PALES_17101	hypothetical protein	PA3354	PA3354	hypothetical protein
PALES_17081	169.4098995	-0.717895585	0.253998304	-2.82637945	0.004707746	0.010245003	0.717895585	-1.644781093	PALES_17081	putative glutamine synthetase	PA3356	pauA5	Glutamylpolyamine synthetase
PALES_17071	68.09507336	-0.756409014	0.276272114	-2.737913009	0.006183043	0.013061026	0.756409014	-1.68928063	dsdA	D-serine dehydratase	PA3357	dsdA	D-serine dehydratase
PALES_17041	11.33415037	1.864128979	0.603593397	3.088385309	0.002012474	0.004734939	1.864128979	3.640480745	PALES_17041	putative secretion protein	PA3360	PA3360	probable secretion protein
PALES_17031	1312.815134	1.22033228	0.261022099	4.67520675	2.94E-06	1.17E-05	1.22033228	2.330003755	lecB	fucose-binding lectin PA-IIL	PA3361	lecB	fucose-binding lectin PA-IIL
PALES_17001	28.16134351	-1.538682951	0.387450461	-3.971302412	7.15E-05	2.26E-04	1.538682951	-2.905291556	amiC	aliphatic amidase expression-regulating protein	PA3364	amiC	aliphatic amidase expression-regulating protein
PALES_16991	39.23393065	-2.561201192	0.377100713	-6.791822719	1.11E-11	8.60E-11	2.561201192	-5.901988836	PALES_16991	putative chaperone	PA3365	PA3365	probable chaperone
PALES_16981	125.8997493	-2.257776576	0.243411851	-9.275540899	1.77E-20	3.22E-19	2.257776576	-4.78253848	amiE	acylamide amidohydrolase	PA3366	amiE	aliphatic amidase
PALES_16911	602.3771286	0.737014542	0.252719086	2.916339066	0.003541654	0.007917519	0.737014542	1.666723215	PALES_16911	hypothetical protein	PA3369	PA3369	hypothetical protein
PALES_16691	178.6018015	1.614201453	0.284356309	5.676685906	1.37E-08	7.65E-08	1.614201453	3.061420996	nosR	regulatory protein NosR	PA3391	nosR	regulatory protein NosR
PALES_16671	57.54588496	1.595224609	0.313116637	5.094665753	3.49E-07	1.59E-06	1.595224609	3.021415529	nosD	NosD protein	PA3393	nosD	NosD protein
PALES_16641	869.4398316	-0.742078574	0.226300174	-3.279178096	0.001041099	0.002607117	0.742078574	-1.672583892	fpr	ferredoxin--NADP+ reductase	PA3397	fprA	FprA
PALES_16581	23.60753203	2.894244545	0.519932926	5.566572922	2.60E-08	1.39E-07	2.894244545	7.434545485	PALES_16581	hypothetical protein	PA3403	PA3403	hypothetical protein
PALES_16541	37.59271727	-1.580335827	0.41250703	-3.831051861	1.28E-04	3.83E-04	1.580335827	-2.990394512	hasAp	heme acquisition protein HasAp	PA3407	hasAp	heme acquisition protein HasAp
PALES_16491	9.009572111	2.78831536	0.781887517	3.566133617	3.62E-04	0.001000391	2.78831536	6.908226378	PALES_16491	hypothetical protein	PA3412	PA3412	hypothetical protein
PALES_16441	291.3685772	-0.717726886	0.242769123	-2.956417513	0.003112355	0.007040555	0.717726886	-1.644588774	PALES_16441	putative pyruvate dehydrogenase E1 component, beta chain	PA3416	PA3416	probable pyruvate dehydrogenase E1 component, beta chain
PALES_16381	23.36563574	2.01834895	0.459653662	4.391021144	1.13E-05	4.05E-05	2.01834895	4.051198989	PALES_16381	hypothetical protein	PA3422	PA3422	hypothetical protein
PALES_16341	79.59970948	1.183807332	0.283107587	4.181475121	2.90E-05	9.82E-05	1.183807332	2.271755123	PALES_16341	enoyl-CoA hydratase	PA3426	PA3426	probable enoyl CoA-hydratase/isomerase
PALES_16301	84.37379416	0.672245775	0.263631537	2.54994445	0.010774008	0.021440089	0.672245775	1.593551644	PALES_16301	aldolase II superfamily protein	PA3430	PA3430	probable aldolase
PALES_16291	19.87852141	-2.520605164	0.543655515	-4.636401353	3.55E-06	1.39E-05	2.520605164	-5.738227489	PALES_16291	putative murein hydrolase export regulator	PA3431	PA3431	conserved hypothetical protein
PALES_16261	55.52022061	-1.632839142	0.29621498	-5.512344923	3.54E-08	1.86E-07	1.632839142	-3.101227025	PALES_16261	flavodoxin	PA3435	PA3435	conserved hypothetical protein
PALES_16251	143.1894749	5.332614198	0.438854106	12.15122319	5.65E-34	3.24E-32	5.332614198	40.29738168	PALES_16251	hypothetical protein	PA3436	PA3436	hypothetical protein
PALES_16241	64.75290919	1.46478515	0.304461601	4.81106696	1.50E-06	6.25E-06	1.46478515	2.760223617	PALES_16241	short chain dehydrogenase	PA3437	folM	dihydromonapterin reductase, FolM
PALES_16231	79.58370078	0.817202656	0.298223679	2.740233973	0.006139546	0.012980677	0.817202656	1.761986238	folE1	GTP cyclohydrolase I	PA3438	folE1	GTP cyclohydrolase I precursor
PALES_16101	194.2588171	-1.894081274	0.674801827	-2.8068704	0.005002536	0.010797576	1.894081274	-3.71685208	PALES_16101	putative antioxidant protein	PA3450	lsfA	1-Cys peroxiredoxin LsfA
PALES_16091	110.2869919	1.327593224	0.266854863	4.974963581	6.53E-07	2.83E-06	1.327593224	2.50983622	PALES_16091	hypothetical protein	PA3451	PA3451	hypothetical protein
PALES_16081	435.0393381	1.266510243	0.228541702	5.541703034	3.00E-08	1.59E-07	1.266510243	2.405789212	mqoA	malate:quinone oxidoreductase	PA3452	mqoA	malate:quinone oxidoreductase
PALES_16071	37.63275391	-1.776756432	0.342184417	-5.19239435	2.08E-07	9.77E-07	1.776756432	-3.42654927	PALES_16071	hypothetical protein	PA3453	PA3453	conserved hypothetical protein
PALES_16041	38.36975933	-0.898903846	0.325328314	-2.763066747	0.005726106	0.012176937	0.898903846	-1.864648693	mnmC	5-methylaminomethyl-2-thiouridine methyltransferase	PA3456	PA3456	hypothetical protein
PALES_16021	49.51563147	-2.473590685	0.34666222	-7.135449276	9.65E-13	8.33E-12	2.473590685	-5.554244492	PALES_16021	putative transcriptional regulator	PA3458	PA3458	probable transcriptional regulator
PALES_15981	58.73147922	0.974230718	0.301645944	3.229715959	0.001239133	0.003048151	0.974230718	1.964593346	PALES_15981	putative sensor/response regulator hybrid	PA3462	PA3462	probable sensor/response regulator hybrid
PALES_15451	10.46252602	4.074749982	0.96508331	4.222174333	2.42E-05	8.28E-05	4.074749982	16.85085608	PALES_15451	putative major facilitator superfamily (MFS) transporter	PA3467	PA3467	probable major facilitator superfamily (MFS) transporter
PALES_15411	377.8114875	-0.598271958	0.217530052	-2.750295657	0.005954152	0.01261185	0.598271958	-1.513902148	PALES_15411	malate dehydrogenase	PA3471	PA3471	probable malic enzyme
PALES_15351	1584.117828	0.687949512	0.186289971	3.692896126	2.22E-04	6.36E-04	0.687949512	1.610992203	rhlR	transcriptional regulator RhlR	PA3477	rhlR	transcriptional regulator RhlR
PALES_15341	1502.766676	1.560502577	0.264015978	5.91063688	3.41E-09	2.04E-08	1.560502577	2.949565766	rhlB	rhamnosyltransferase chain B	PA3478	rhlB	rhamnosyltransferase chain B
PALES_15331	4026.844982	1.425090764	0.243859416	5.843902962	5.10E-09	2.99E-08	1.425090764	2.68531394	rhlA	rhamnosyltransferase chain A	PA3479	rhlA	rhamnosyltransferase chain A
PALES_15321	234.3333812	-1.367669481	0.235170358	-5.815654196	6.04E-09	3.50E-08	1.367669481	-2.580533716	dcd	deoxycytidine triphosphate deaminase	PA3480	PA3480	probable deoxycytidine triphosphate deaminase
PALES_15281	74.16514085	-1.189149013	0.28841139	-4.12310004	3.74E-05	1.24E-04	1.189149013	-2.280182049	PALES_15281	hypothetical protein	PA3484	tse3	Tse3
PALES_15241	64.89558106	-1.14369851	0.275701467	-4.148322184	3.35E-05	1.12E-04	1.14369851	-2.209467193	PALES_15241	electron transport complex protein RnfC	PA3491	PA3491	probable ferredoxin
PALES_15231	9.359793202	-1.583346068	0.587774407	-2.693798928	0.007064277	0.014661997	1.583346068	-2.996640605	PALES_15231	putative NADH:ubiquinone oxidoreductase, subunit RnfD	PA3492	PA3492	conserved hypothetical protein
PALES_15201	34.22494062	-1.554335336	0.38050284	-4.08495068	4.41E-05	1.45E-04	1.554335336	-2.936983857	nth	endonuclease III	PA3495	nth	endonuclease III
PALES_15191	338.4279397	-1.763998458	0.30842013	-5.719466041	1.07E-08	6.06E-08	1.763998458	-3.396381355	PALES_15191	hypothetical protein	PA3496	PA3496	hypothetical protein
PALES_15091	172.0254033	-0.745023602	0.223335568	-3.335893192	8.50E-04	0.002167817	0.745023602	-1.676001688	gloA1	lactoylglutathione lyase	PA3524	gloA1	lactoylglutathione lyase
PALES_15081	653.4102714	-1.420112444	0.203062128	-6.993487446	2.68E-12	2.21E-11	1.420112444	-2.676063675	argG	argininosuccinate synthase	PA3525	argG	argininosuccinate synthase
PALES_15071	154.9332627	1.456464392	0.25562374	5.697688309	1.21E-08	6.79E-08	1.456464392	2.744349819	PALES_15071	putative outer membrane protein precursor	PA3526	motY	MotY
PALES_15041	826.6613087	-2.354019413	0.233235095	-10.09290395	5.94E-24	1.46E-22	2.354019413	-5.112466248	PALES_15041	putative peroxidase	PA3529	PA3529	alkylhydroperoxide reductase C
PALES_15031	115.9843861	1.54445526	0.265784727	5.810925534	6.21E-09	3.59E-08	1.54445526	2.916939087	PALES_15031	putative bacterioferritin-associated ferredoxin	PA3530	bfd	bacterioferritin-associated ferredoxin Bfd
PALES_15021	464.9133118	-1.783148866	0.210368057	-8.476329016	2.32E-17	3.12E-16	1.783148866	-3.441765647	bfrB	bacterioferritin	PA3531	bfrB	bacterioferritin
PALES_15001	547.9243629	0.797575186	0.197858346	4.031041411	5.55E-05	1.79E-04	0.797575186	1.738177223	PALES_15001	glutaredoxin-related protein	PA3533	grxD	GrxD
PALES_14981	288.1095365	-1.525146375	0.253664253	-6.012460788	1.83E-09	1.13E-08	1.525146375	-2.878159162	PALES_14981	putative serine protease	PA3535	PA3535	probable serine protease
PALES_14971	35.15396883	0.883497136	0.350395049	2.521431563	0.011687841	0.023079603	0.883497136	1.844841837	PALES_14971	hypothetical protein	PA3536	PA3536	hypothetical protein
PALES_14961	90.20434785	-0.732870107	0.266400519	-2.751008561	0.005941209	0.012594939	0.732870107	-1.661942084	argF	ornithine carbamoyltransferase	PA3537	argF	ornithine carbamoyltransferase, anabolic
PALES_14941	43.91593129	-1.295060167	0.321827196	-4.024085547	5.72E-05	1.83E-04	1.295060167	-2.453872289	PALES_14941	hypothetical protein	PA3539	PA3539	conserved hypothetical protein
PALES_14931	64.80230658	3.299316749	0.384518418	8.580386769	9.46E-18	1.33E-16	3.299316749	9.844491917	algD	GDP-mannose 6-dehydrogenase AlgD	PA3540	algD	GDP-mannose 6-dehydrogenase AlgD
PALES_14891	10.02178945	1.424503179	0.613429995	2.322193552	0.020222516	0.037694263	1.424503179	2.684220482	algE	Alginate production outer membrane protein AlgE precursor	PA3544	algE	Alginate production outer membrane protein AlgE precursor
PALES_14881	15.04224419	2.372762727	0.612247432	3.875496411	1.06E-04	3.25E-04	2.372762727	5.179320108	algG	alginate-c5-mannuronan-epimerase AlgG	PA3545	algG	alginate-c5-mannuronan-epimerase AlgG
PALES_14821	27.87479415	0.991350244	0.385450073	2.571929059	0.010113361	0.02022247	0.991350244	1.988044767	algA	phosphomannose isomerase / guanosine 5'-diphospho-D-mannose pyrophosphorylase	PA3551	algA	phosphomannose isomerase / guanosine 5'-diphospho-D-mannose pyrophosphorylase
PALES_14811	18.84343692	1.732633911	0.486146245	3.56401788	3.65E-04	0.001007324	1.732633911	3.32334003	PALES_14811	UDP-4-amino-4-deoxy-L-arabinose--oxoglutarate aminotransferase	PA3552	arnB	ArnB
PALES_14791	24.67221727	2.196052763	0.448472034	4.896744049	9.74E-07	4.14E-06	2.196052763	4.582239172	PALES_14791	bifunctional UDP-glucuronic acid decarboxylase/UDP-4-amino-4-deoxy-L-arabinose formyltransferase	PA3554	arnA	ArnA
PALES_14741	28.03575676	1.552668477	0.393434544	3.946446747	7.93E-05	2.49E-04	1.552668477	2.933592488	PALES_14741	putative nucleotide sugar dehydrogenase	PA3559	PA3559	probable nucleotide sugar dehydrogenase
PALES_14711	47.61367185	0.962003716	0.343504867	2.800553382	0.005101507	0.010976319	0.962003716	1.948013554	fruI	phosphotransferase system transporter enzyme I, FruI	PA3562	fruI	phosphotransferase system transporter enzyme I, FruI
PALES_14651	102.5338889	-2.128107878	0.283092999	-7.517345494	5.59E-14	5.46E-13	2.128107878	-4.371437819	PALES_14651	putative acetyl-coa synthetase	PA3568	PA3568	probable acetyl-coa synthetase
PALES_14641	148.8555844	-3.346645948	0.289568803	-11.55734288	6.78E-31	3.04E-29	3.346645948	-10.17280724	mmsB	3-hydroxyisobutyrate dehydrogenase	PA3569	mmsB	3-hydroxyisobutyrate dehydrogenase
PALES_14631	334.2606832	-2.929214049	0.220036621	-13.31239337	1.96E-40	1.79E-38	2.929214049	-7.616953292	mmsA	methylmalonate-semialdehyde dehydrogenase	PA3570	mmsA	methylmalonate-semialdehyde dehydrogenase
PALES_14621	32.8423332	0.976967847	0.370823364	2.63459086	0.008423875	0.017110435	0.976967847	1.968324176	mmsR	transcriptional regulator MmsR	PA3571	mmsR	transcriptional regulator MmsR
PALES_14611	201.8753298	-2.174760553	0.277059056	-7.849447651	4.18E-15	4.65E-14	2.174760553	-4.515108177	PALES_14611	hypothetical protein	PA3572	PA3572	hypothetical protein
PALES_14571	43.28904575	1.116544127	0.330408576	3.379283132	7.27E-04	0.001880143	1.116544127	2.168269565	PALES_14571	hypothetical protein	PA3576	PA3576	hypothetical protein
PALES_14561	139.3704911	1.173334102	0.24855951	4.720535946	2.35E-06	9.53E-06	1.173334102	2.255323055	PALES_14561	putative phenazine biosynthesis protein, PhzF family	PA3578	PA3578	conserved hypothetical protein
PALES_14531	584.2129597	0.662873649	0.194567961	3.406900317	6.57E-04	0.001722314	0.662873649	1.583233066	glpF	glycerol uptake facilitator protein	PA3581	glpF	glycerol uptake facilitator protein
PALES_14491	24.19119505	1.014765206	0.412062214	2.462650472	0.013791429	0.026803785	1.014765206	2.020574024	glpM	membrane protein GlpM	PA3585	glpM	membrane protein GlpM
PALES_14471	56.86298011	1.916419189	0.321711383	5.956951754	2.57E-09	1.55E-08	1.916419189	3.774849663	metR	transcriptional regulator MetR	PA3587	metR	transcriptional regulator MetR
PALES_14381	13.02764961	1.478531795	0.545620654	2.709816396	0.006732046	0.014089296	1.478531795	2.786649966	PALES_14381	putative amino acid permease	PA3597	PA3597	probable amino acid permease
PALES_14371	54.82829613	1.035885526	0.327144719	3.166444289	0.001543149	0.00372093	1.035885526	2.050371777	PALES_14371	putative carbon-nitrogen hydrolase family protein	PA3598	PA3598	conserved hypothetical protein
PALES_14301	72.82281586	-1.029021819	0.37046444	-2.77765342	0.005475298	0.011689273	1.029021819	-2.04064018	PALES_14301	putative transmembrane protein	PA3605	PA3605	hypothetical protein
PALES_14291	49.66527076	1.158278019	0.328714826	3.523656153	4.26E-04	0.001157838	1.158278019	2.23190871	PALES_14291	hypothetical protein	PA3606	PA3606	conserved hypothetical protein
PALES_14271	55.73518274	-0.816970645	0.327232549	-2.496605696	0.012538829	0.024616901	0.816970645	-1.761702902	potB	polyamine transport protein PotB	PA3608	potB	polyamine transport protein PotB
PALES_14251	12.36117506	-1.570041008	0.550078244	-2.854213969	0.004314346	0.009462508	1.570041008	-2.969131536	potD	polyamine transport protein PotD	PA3610	potD	polyamine transport protein PotD
PALES_14241	205.1022151	-0.662963782	0.252547711	-2.625103114	0.008662273	0.017557165	0.662963782	-1.583331983	PALES_14241	putative secreted protein	PA3611	PA3611	hypothetical protein
PALES_14221	551.5515074	-3.744620788	0.263769102	-14.19658619	9.62E-46	1.24E-43	3.744620788	-13.40427039	PALES_14221	hypothetical protein	PA3613	PA3613	hypothetical protein
PALES_14211	583.1511655	-1.606301427	0.234064215	-6.862652734	6.76E-12	5.35E-11	1.606301427	-3.044702834	PALES_14211	putative metallo-beta-lactamase superfamily protein	PA3614	PA3614	hypothetical protein
PALES_14201	368.1357815	-0.983491348	0.240045715	-4.097100208	4.18E-05	1.38E-04	0.983491348	-1.977244591	PALES_14201	putative lysine decarboxylase	PA3615	PA3615	hypothetical protein
PALES_14191	88.6034993	0.809936036	0.28331525	2.858780226	0.004252733	0.009335986	0.809936036	1.753133713	recX	recombination regulator RecX	PA3616	PA3616	conserved hypothetical protein
PALES_14181	1267.544341	0.762831019	0.235570952	3.238221916	0.001202772	0.002969589	0.762831019	1.696817045	recA	recombinase A	PA3617	recA	RecA protein
PALES_14141	44.14750994	-2.145418646	0.346763565	-6.186978284	6.13E-10	3.99E-09	2.145418646	-4.424206259	fdxA	ferredoxin I	PA3621	fdxA	ferredoxin I
PALES_14121	1470.029545	0.831728098	0.180760503	4.601271205	4.20E-06	1.63E-05	0.831728098	1.779815996	PALES_14121	putative lipoprotein NlpD	PA3623	PA3623	conserved hypothetical protein
PALES_14111	171.8774928	-0.60998895	0.225188097	-2.708797484	0.006752754	0.014120205	0.60998895	-1.526247519	pcm	protein-L-isoaspartate O-methyltransferase	PA3624	pcm	L-isoaspartate protein carboxylmethyltransferase type II
PALES_14101	148.123487	-0.728640599	0.226397998	-3.218405658	0.001289054	0.00315951	0.728640599	-1.65707695	surE	stationary phase survival protein SurE	PA3625	surE	survival protein SurE
PALES_14091	88.35740692	-0.837413599	0.26606482	-3.147404456	0.001647269	0.003947967	0.837413599	-1.786843893	truD	tRNA pseudouridine synthase D	PA3626	PA3626	conserved hypothetical protein
PALES_14081	80.48376513	-0.792161988	0.274136347	-2.889664196	0.003856535	0.008541139	0.792161988	-1.731667554	ispF	2-C-methyl-D-erythritol 2,4-cyclodiphosphate synthase	PA3627	ygbB	2C-methyl-D-erythritol 2,4-cyclodiphosphate synthase
PALES_14051	21.54470625	1.191757225	0.436939415	2.72751138	0.006381406	0.013456135	1.191757225	2.284308061	PALES_14051	putative transcriptional regulator	PA3630	gfnR	glutathione-dependent formaldehyde neutralization regulator GfnR
PALES_14041	67.94016637	-0.778155364	0.276171514	-2.817652524	0.004837613	0.010494001	0.778155364	-1.714936745	PALES_14041	putative inner membrane protein	PA3631	PA3631	conserved hypothetical protein
PALES_14031	14.57496662	-1.222853344	0.490398007	-2.493593624	0.012645723	0.024785826	1.222853344	-2.334078923	PALES_14031	hypothetical protein	PA3632	PA3632	conserved hypothetical protein
PALES_14001	770.2611275	-1.102745281	0.195609912	-5.637471397	1.73E-08	9.48E-08	1.102745281	-2.14762973	eno	phosphopyruvate hydratase	PA3635	eno	enolase
PALES_13991	560.307243	-0.60653933	0.228726443	-2.651811143	0.008006131	0.016359756	0.60653933	-1.522602477	kdsA	2-dehydro-3-deoxyphosphooctonate aldolase	PA3636	kdsA	2-dehydro-3-deoxyphosphooctonate aldolase
PALES_13961	432.0065975	-1.791244412	0.210058353	-8.527365796	1.50E-17	2.05E-16	1.791244412	-3.461133075	accA	acetyl-CoA carboxylase carboxyltransferase subunit alpha	PA3639	accA	acetyl-coenzyme A carboxylase carboxyl transferase (alpha subunit)
PALES_13951	655.970247	-0.785789855	0.203806755	-3.855563353	1.15E-04	3.50E-04	0.785789855	-1.724035946	dnaE	DNA polymerase III subunit alpha	PA3640	dnaE	DNA polymerase III, alpha chain
PALES_13941	53.3999487	-1.567312011	0.316391197	-4.953715614	7.28E-07	3.14E-06	1.567312011	-2.963520446	PALES_13941	putative amino acid permease	PA3641	PA3641	probable amino acid permease
PALES_13931	24.69768578	-1.35525181	0.403231679	-3.360975541	7.77E-04	0.002000595	1.35525181	-2.558417673	rnhB	ribonuclease HII	PA3642	rnhB	ribonuclease HII
PALES_13921	48.29134795	-1.220772881	0.32439146	-3.763270707	1.68E-04	4.92E-04	1.220772881	-2.33071545	lpxB	lipid-A-disaccharide synthase	PA3643	lpxB	lipid A-disaccharide synthase
PALES_13911	407.281896	-0.930992322	0.220281166	-4.226381843	2.37E-05	8.14E-05	0.930992322	-1.906586944	lpxA	UDP-N-acetylglucosamine acyltransferase	PA3644	lpxA	UDP-N-acetylglucosamine acyltransferase
PALES_13901	301.0652298	-0.968130735	0.240368003	-4.027702196	5.63E-05	1.81E-04	0.968130735	-1.956304216	fabZ	(3R)-hydroxymyristoyl-ACP dehydratase	PA3645	fabZ	(3R)-hydroxymyristoyl-[acyl carrier protein] dehydratase
PALES_13891	482.4923422	-1.124232153	0.203991794	-5.511163618	3.56E-08	1.87E-07	1.124232153	-2.17985497	lpxD	UDP-3-O-[3-hydroxymyristoyl] glucosamine N-acyltransferase	PA3646	lpxD	UDP-3-O-[3-hydroxylauroyl] glucosamine N-acyltransferase
PALES_13881	171.525836	-1.259278729	0.220407979	-5.713399003	1.11E-08	6.24E-08	1.259278729	-2.393760358	PALES_13881	putative outer membrane protein precursor	PA3647	PA3647	probable outer membrane protein precursor
PALES_13871	1555.771836	-0.986373806	0.228243788	-4.321580083	1.55E-05	5.46E-05	0.986373806	-1.981199012	PALES_13871	putative outer membrane protein precursor	PA3648	opr86	outer membrane protein Opr86
PALES_13861	168.5921418	-0.666008513	0.247480437	-2.691156198	0.007120485	0.014765768	0.666008513	-1.586677049	PALES_13861	putative membrane-associated zinc metalloprotease	PA3649	mucP	MucP
PALES_13851	124.835198	-1.438748107	0.250431281	-5.74508146	9.19E-09	5.23E-08	1.438748107	-2.710855301	dxr	1-deoxy-d-xylulose 5-phosphate reductoisomerase	PA3650	dxr	1-deoxy-d-xylulose 5-phosphate reductoisomerase
PALES_13841	22.62062398	-1.497199487	0.442328558	-3.384813078	7.12E-04	0.001849717	1.497199487	-2.822942	cdsA	phosphatidate cytidylyltransferase	PA3651	cdsA	phosphatidate cytidylyltransferase
PALES_13831	157.0524738	-1.978581814	0.238674973	-8.289858759	1.13E-16	1.43E-15	1.978581814	-3.94105481	uppS	undecaprenyl pyrophosphate synthetase	PA3652	uppS	undecaprenyl pyrophosphate synthetase
PALES_13821	292.0914711	-1.939031627	0.223635678	-8.670493187	4.30E-18	6.29E-17	1.939031627	-3.834481812	frr	ribosome recycling factor	PA3653	frr	ribosome recycling factor
PALES_13811	234.2848161	-2.130115484	0.271766926	-7.838023253	4.58E-15	5.06E-14	2.130115484	-4.377525199	pyrH	uridylate kinase	PA3654	pyrH	uridylate kinase
PALES_13801	1435.022947	-2.687302753	0.209743249	-12.81234448	1.40E-37	1.15E-35	2.687302753	-6.441080637	tsf	elongation factor Ts	PA3655	tsf	elongation factor Ts
PALES_13791	3281.627999	-3.073020186	0.225950531	-13.60041142	3.98E-42	4.12E-40	3.073020186	-8.41533198	rpsB	30S ribosomal protein S2	PA3656	rpsB	30S ribosomal protein S2
PALES_13781	369.2133805	-0.709359435	0.218888577	-3.240733	0.001192228	0.002949555	0.709359435	-1.635077971	map	methionine aminopeptidase	PA3657	map	methionine aminopeptidase
PALES_13741	33.11791387	-1.35274279	0.345451102	-3.915873425	9.01E-05	2.79E-04	1.35274279	-2.553972144	PALES_13741	hypothetical protein	PA3661	PA3661	hypothetical protein
PALES_13201	79.97541498	1.493811992	0.303782171	4.917378743	8.77E-07	3.75E-06	1.493811992	2.816321415	PALES_13201	putative arsenate reductase, glutaredoxin family	PA3664	PA3664	conserved hypothetical protein
PALES_13171	120.8733283	0.924964723	0.24213641	3.820015025	1.33E-04	3.98E-04	0.924964723	1.898637815	PALES_13171	putative pyridoxal-phosphate dependent enzyme	PA3667	PA3667	probable pyridoxal-phosphate dependent enzyme
PALES_13161	18.63525096	1.452098196	0.5224934	2.779170406	0.005449793	0.011641404	1.452098196	2.736056828	PALES_13161	putative Fe-S center assembly protein	PA3668	PA3668	conserved hypothetical protein
PALES_13141	23.54746274	-1.820046648	0.42969244	-4.235696229	2.28E-05	7.83E-05	1.820046648	-3.530926152	PALES_13141	putative auxiliary component of ABC transporter	PA3670	PA3670	hypothetical protein
PALES_13121	18.18444239	-1.794357126	0.513406484	-3.495002853	4.74E-04	0.001277133	1.794357126	-3.46860877	PALES_13121	putative ATP-binding component of ABC transporter	PA3672	PA3672	probable ATP-binding component of ABC transporter
PALES_13111	122.4755156	-0.733206628	0.235353096	-3.115347274	0.001837285	0.004354241	0.733206628	-1.662329791	plsB	glycerol-3-phosphate acyltransferase	PA3673	plsB	glycerol-3-phosphate acyltransferase
PALES_13101	128.8633916	-1.317043915	0.243563595	-5.407392323	6.39E-08	3.24E-07	1.317043915	-2.491550673	PALES_13101	putative lipoprotein	PA3674	PA3674	hypothetical protein
PALES_13091	95.54949459	-1.139297014	0.28204256	-4.039450697	5.36E-05	1.73E-04	1.139297014	-2.202736636	PALES_13091	hypothetical protein	PA3675	PA3675	hypothetical protein
PALES_13081	43.60019493	-1.472006134	0.317120257	-4.641791561	3.45E-06	1.35E-05	1.472006134	-2.774073734	PALES_13081	putative Resistance-Nodulation-Cell Division (RND) efflux transporter	PA3676	mexK	MexK
PALES_13071	46.1940647	-2.198549824	0.32813268	-6.700185493	2.08E-11	1.58E-10	2.198549824	-4.590177122	PALES_13071	putative Resistance-Nodulation-Cell Division (RND) efflux membrane fusion protein precursor	PA3677	mexJ	MexJ
PALES_13041	22.17058574	-1.336208219	0.405968024	-3.291412473	9.97E-04	0.002509292	1.336208219	-2.524868444	PALES_13041	hypothetical protein	PA3680	PA3680	conserved hypothetical protein
PALES_13001	189.4348894	0.909854543	0.256782987	3.543282024	3.95E-04	0.001080552	0.909854543	1.878856057	PALES_13001	hypothetical protein	PA3684	PA3684	hypothetical protein
PALES_12991	35.10344134	-1.152783447	0.361941915	-3.18499571	0.001447562	0.003504661	1.152783447	-2.223424547	PALES_12991	putative protease with chaperone activity	PA3685	yeaZ	YeaZ
PALES_12981	455.7961084	-2.234782892	0.222055664	-10.06406615	7.96E-24	1.95E-22	2.234782892	-4.706918563	adk	adenylate kinase	PA3686	adk	adenylate kinase
PALES_12961	286.6626859	1.651670099	0.214908309	7.685464121	1.52E-14	1.58E-13	1.651670099	3.141971511	PALES_12961	hypothetical protein	PA3688	PA3688	hypothetical protein
PALES_12921	2061.122587	-0.632243254	0.238514162	-2.650757711	0.008031143	0.016396774	0.632243254	-1.549973182	PALES_12921	putative outer membrane protein precursor	PA3692	lptF	Lipotoxon F, LptF
PALES_12871	305.2512066	0.588354197	0.216154413	2.721916197	0.00649046	0.013631686	0.588354197	1.503530565	PALES_12871	hypothetical protein	PA3697	PA3697	hypothetical protein
PALES_12841	643.6302198	-1.466018231	0.271873785	-5.392275051	6.96E-08	3.50E-07	1.466018231	-2.762583805	lysS	lysyl-tRNA synthetase	PA3700	lysS	lysyl-tRNA synthetase
PALES_12821	445.7096066	-0.694458484	0.208226724	-3.335107378	8.53E-04	0.002172787	0.694458484	-1.618276899	PALES_12821	putative peptide chain release factor 2	PA3701	PA3701	NA
PALES_12741	591.807661	0.597158937	0.202140018	2.95418464	0.003134964	0.007084959	0.597158937	1.512734642	wspA	putative chemotaxis transducer	PA3708	wspA	probable chemotaxis transducer
PALES_12731	36.39827567	-1.291677388	0.338113351	-3.820249583	1.33E-04	3.98E-04	1.291677388	-2.44812528	PALES_12731	putative major facilitator superfamily (MFS) transporter	PA3709	PA3709	probable major facilitator superfamily (MFS) transporter
PALES_12721	105.8282193	-0.769901811	0.240202949	-3.205213824	0.001349622	0.003291001	0.769901811	-1.705153728	PALES_12721	putative GMC-type oxidoreductase	PA3710	PA3710	probable GMC-type oxidoreductase
PALES_12701	168.875813	0.61089979	0.228656677	2.671690146	0.00754703	0.015528398	0.61089979	1.527211414	PALES_12701	hypothetical protein	PA3712	PA3712	hypothetical protein
PALES_12681	51.18859269	2.82704155	0.430445234	6.567714844	5.11E-11	3.72E-10	2.82704155	7.096174811	PALES_12681	putative two-component response regulator	PA3714	PA3714	probable two-component response regulator
PALES_12661	221.2373359	-1.565255182	0.213791698	-7.321403012	2.45E-13	2.27E-12	1.565255182	-2.959298409	PALES_12661	hypothetical protein	PA3716	PA3716	hypothetical protein
PALES_12621	8.736383717	1.669223709	0.66410501	2.513493623	0.011954194	0.023556648	1.669223709	3.180434134	PALES_12621	hypothetical protein	PA3720	PA3720	hypothetical protein
PALES_12601	92.3145188	1.297648235	0.27509898	4.717023065	2.39E-06	9.68E-06	1.297648235	2.458278272	PALES_12601	hypothetical protein	PA3722	PA3722	hypothetical protein
PALES_12581	5361.124755	-1.7582721	0.205737546	-8.546189718	1.27E-17	1.76E-16	1.7582721	-3.382927127	lasB	elastase LasB	PA3724	lasB	elastase LasB
PALES_12571	49.42137673	-1.001696977	0.302714738	-3.309045946	9.36E-04	0.002367749	1.001696977	-2.002353894	recJ	single-stranded-DNA-specific exonuclease RecJ	PA3725	recJ	single-stranded-DNA-specific exonuclease RecJ
PALES_12561	31.71216829	-1.763260836	0.371736571	-4.743307424	2.10E-06	8.61E-06	1.763260836	-3.394645296	PALES_12561	hypothetical protein	PA3726	PA3726	conserved hypothetical protein
PALES_12551	30.62892866	-1.23987696	0.391828253	-3.164337818	0.001554363	0.003742276	1.23987696	-2.361783891	PALES_12551	hypothetical protein	PA3727	PA3727	hypothetical protein
PALES_12541	263.3214069	-2.136395635	0.208833473	-10.23013987	1.45E-24	3.91E-23	2.136395635	-4.396622405	PALES_12541	hypothetical protein	PA3728	PA3728	hypothetical protein
PALES_12531	318.3899729	-2.163682622	0.243521299	-8.884983093	6.39E-19	1.00E-17	2.163682622	-4.48057107	PALES_12531	hypothetical protein	PA3729	PA3729	conserved hypothetical protein
PALES_12521	34.48462136	-1.145493763	0.343685744	-3.33296851	8.59E-04	0.002186131	1.145493763	-2.21221831	PALES_12521	hypothetical protein	PA3730	PA3730	hypothetical protein
PALES_12511	182.6678606	-1.231985988	0.240732602	-5.117653269	3.09E-07	1.42E-06	1.231985988	-2.348901129	PALES_12511	putative phage shock protein	PA3731	PA3731	conserved hypothetical protein
PALES_12501	110.3614973	-0.93402537	0.278181004	-3.357617363	7.86E-04	0.002021771	0.93402537	-1.91059947	PALES_12501	hypothetical protein	PA3732	PA3732	Uncharacterized protein
PALES_12451	168.0550095	-1.175367982	0.223689509	-5.254461809	1.48E-07	7.14E-07	1.175367982	-2.258504803	thrC	threonine synthase	PA3735	thrC	threonine synthase
PALES_12441	179.0607974	-1.165261534	0.224957055	-5.179928827	2.22E-07	1.04E-06	1.165261534	-2.242738686	hom	homoserine dehydrogenase	PA3736	hom	homoserine dehydrogenase
PALES_12401	236.6996162	1.953014575	0.241054756	8.101954117	5.41E-16	6.43E-15	1.953014575	3.871827223	PALES_12401	hypothetical protein	PA3740	PA3740	hypothetical protein
PALES_12391	20.41685097	-1.540179838	0.455686295	-3.379912577	7.25E-04	0.001876863	1.540179838	-2.908307545	PALES_12391	putative ong-chain acyl-CoA thioester hydrolase	PA3741	PA3741	hypothetical protein
PALES_12381	357.985589	-1.970999976	0.225755191	-8.730696155	2.53E-18	3.77E-17	1.970999976	-3.920397595	rplS	50S ribosomal protein L19	PA3742	rplS	50S ribosomal protein L19
PALES_12371	786.6005516	-2.294510029	0.195401833	-11.74252052	7.72E-32	3.74E-30	2.294510029	-4.905873483	trmD	tRNA (guanine-N(1)-)-methyltransferase	PA3743	trmD	tRNA (guanine-N1)-methyltransferase
PALES_12361	781.4866701	-2.048995846	0.206138066	-9.939919831	2.79E-23	6.54E-22	2.048995846	-4.13817841	rimM	16S rRNA-processing protein RimM	PA3744	rimM	16S rRNA processing protein
PALES_12351	117.5309005	-2.062098109	0.251110565	-8.211912992	2.18E-16	2.70E-15	2.062098109	-4.175931679	rpsP	30S ribosomal protein S16	PA3745	rpsP	30S ribosomal protein S16
PALES_12341	287.5704726	-1.373230726	0.223502649	-6.144136243	8.04E-10	5.17E-09	1.373230726	-2.590500255	ffh	signal recognition particle protein Ffh	PA3746	ffh	signal recognition particle protein Ffh
PALES_12321	53.36394552	-0.842089914	0.300283488	-2.804316409	0.005042339	0.010868687	0.842089914	-1.79264512	PALES_12321	putative hemolysin containing a CBS domain	PA3748	PA3748	conserved hypothetical protein
PALES_12311	20.82267143	1.938497828	0.478785094	4.048784834	5.15E-05	1.67E-04	1.938497828	3.833063314	PALES_12311	putative major facilitator superfamily (MFS) transporter	PA3749	PA3749	probable major facilitator superfamily (MFS) transporter
PALES_12251	78.36954686	1.271168169	0.294299661	4.319298789	1.57E-05	5.51E-05	1.271168169	2.413569163	PALES_12251	MutT/nudix family protein	PA3755	PA3755	conserved hypothetical protein
PALES_12241	441.6272212	0.985266062	0.265968828	3.704441876	2.12E-04	6.11E-04	0.985266062	1.979678372	PALES_12241	hypothetical protein	PA3756	PA3756	hypothetical protein
PALES_12231	57.59275833	2.138848627	0.352096382	6.074611204	1.24E-09	7.84E-09	2.138848627	4.404104274	nagR	Transcriptional regulator of N-Acetylglucosamine catabolism operon	PA3757	nagR	Transcriptional regulator of N-Acetylglucosamine catabolism operon
PALES_12221	41.10107605	1.075662022	0.328923361	3.270251216	0.00107452	0.002683479	1.075662022	2.107689024	PALES_12221	putative N-acetylglucosamine-6-phosphate deacetylase	PA3758	PA3758	probable N-acetylglucosamine-6-phosphate deacetylase
PALES_12211	24.88170754	1.434671098	0.409833139	3.500622473	4.64E-04	0.001254058	1.434671098	2.703205325	PALES_12211	putative aminotransferase	PA3759	PA3759	probable aminotransferase
PALES_12201	49.43388847	1.44642863	0.333964667	4.331082812	1.48E-05	5.25E-05	1.44642863	2.725325653	PALES_12201	N-Acetyl-D-Glucosamine phosphotransferase system transporter	PA3760	PA3760	N-Acetyl-D-Glucosamine phosphotransferase system transporter
PALES_12161	553.469346	-1.125133424	0.19907052	-5.651933931	1.59E-08	8.74E-08	1.125133424	-2.18121718	purL	phosphoribosylformylglycinamidine synthase	PA3763	purL	phosphoribosylformylglycinamidine synthase
PALES_12121	92.43214263	1.512242583	0.269209554	5.617343659	1.94E-08	1.06E-07	1.512242583	2.852531035	PALES_12121	putative Cytosine/adenosine deaminase	PA3767	PA3767	conserved hypothetical protein
PALES_12051	319.3887999	-1.634081521	0.223540935	-7.309987874	2.67E-13	2.45E-12	1.634081521	-3.103898802	guaA	GMP synthase	PA3769	guaA	GMP synthase
PALES_12041	523.280572	-1.356204031	0.202855387	-6.685570705	2.30E-11	1.74E-10	1.356204031	-2.560106862	guaB	inosine 5'-monophosphate dehydrogenase	PA3770	guaB	inosine-5'-monophosphate dehydrogenase
PALES_12031	36.05068889	1.206228806	0.357239561	3.37652639	7.34E-04	0.001898052	1.206228806	2.307337116	PALES_12031	putative transcriptional regulator	PA3771	PA3771	probable transcriptional regulator
PALES_12021	16.08525262	1.63456936	0.535966464	3.049760515	0.002290239	0.005322623	1.63456936	3.104948543	PALES_12021	hypothetical protein	PA3772	PA3772	hypothetical protein
PALES_12011	6.518546898	2.655346277	0.895659594	2.964682445	0.003029955	0.006867224	2.655346277	6.299975755	PALES_12011	putative permease	PA3773	PA3773	hypothetical protein
PALES_11961	36.89179398	-0.768564095	0.330871305	-2.322849044	0.020187263	0.037649627	0.768564095	-1.703573384	PALES_11961	putative transcriptional regulator	PA3778	PA3778	probable transcriptional regulator
PALES_11951	37.42217844	-1.671279014	0.368411207	-4.536449989	5.72E-06	2.16E-05	1.671279014	-3.184968301	PALES_11951	putative TRAP-type C4-dicarboxylate transport	PA3779	PA3779	hypothetical protein
PALES_11921	20.67528227	1.236003931	0.434301417	2.845958782	0.004427793	0.00968898	1.236003931	2.355451998	PALES_11921	putative transcriptional regulator	PA3782	PA3782	probable transcriptional regulator
PALES_11901	92.48224738	0.939648662	0.288391836	3.258235995	0.001121071	0.00278802	0.939648662	1.918061079	PALES_11901	hypothetical protein	PA3784	PA3784	hypothetical protein
PALES_11891	164.2782097	1.538808507	0.238354776	6.455958364	1.08E-10	7.55E-10	1.538808507	2.905544413	PALES_11891	putative membrane or periplasmic protein	PA3785	PA3785	conserved hypothetical protein
PALES_11881	194.7606252	1.53119806	0.224520426	6.819860848	9.11E-12	7.13E-11	1.53119806	2.890257556	PALES_11881	hypothetical protein	PA3786	PA3786	hypothetical protein
PALES_11871	324.0459385	1.633058496	0.248519641	6.571144585	4.99E-11	3.64E-10	1.633058496	3.101698585	PALES_11871	putative peptidase	PA3787	PA3787	conserved hypothetical protein
PALES_11861	123.2691022	1.288422155	0.332964386	3.869549441	1.09E-04	3.33E-04	1.288422155	2.442607666	PALES_11861	hypothetical protein	PA3788	PA3788	hypothetical protein
PALES_11841	332.0621981	-1.374035214	0.26316454	-5.221201968	1.78E-07	8.45E-07	1.374035214	-2.591945195	oprC	Putative copper transport outer membrane porin OprC precursor	PA3790	oprC	Putative copper transport outer membrane porin OprC precursor
PALES_11821	1454.99697	0.732459262	0.201533678	3.634426115	2.79E-04	7.86E-04	0.732459262	1.66146887	leuA	2-isopropylmalate synthase	PA3792	leuA	2-isopropylmalate synthase
PALES_11761	95.56812623	-0.624485453	0.256073059	-2.438700332	0.014740186	0.028422378	0.624485453	-1.541660884	PALES_11761	putative aminotransferase	PA3798	PA3798	probable aminotransferase
PALES_11741	236.1670225	-1.198356284	0.207124872	-5.785670602	7.22E-09	4.14E-08	1.198356284	-2.294780691	PALES_11741	hypothetical protein	PA3800	PA3800	conserved hypothetical protein
PALES_11731	141.3732927	-1.289020811	0.238527243	-5.404082133	6.51E-08	3.30E-07	1.289020811	-2.443621453	PALES_11731	hypothetical protein	PA3801	PA3801	conserved hypothetical protein
PALES_11721	176.1117826	-0.963373798	0.216574774	-4.448227178	8.66E-06	3.16E-05	0.963373798	-1.9498644	hisS	histidyl-tRNA synthetase	PA3802	hisS	histidyl-tRNA synthetase
PALES_11711	284.8863708	-1.168612792	0.208954717	-5.592660512	2.24E-08	1.21E-07	1.168612792	-2.247954434	ispG	4-hydroxy-3-methylbut-2-en-1-yl diphosphate synthase	PA3803	gcpE	probable isoprenoid biosynthetic protein GcpE
PALES_11701	176.2189539	-0.763838364	0.228537243	-3.342292727	8.31E-04	0.00212414	0.763838364	-1.698002243	PALES_11701	hypothetical protein	PA3804	PA3804	hypothetical protein
PALES_11691	179.9165813	-0.59092426	0.225659242	-2.61865747	0.008827654	0.017846723	0.59092426	-1.50621139	pilF	type 4 fimbrial biogenesis protein PilF	PA3805	pilF	type 4 fimbrial biogenesis protein PilF
PALES_11681	478.9852643	-1.082162137	0.19342855	-5.594635002	2.21E-08	1.20E-07	1.082162137	-2.117206718	PALES_11681	putative Fe-S-cluster redox enzyme	PA3806	PA3806	conserved hypothetical protein
PALES_11671	493.0611916	-1.832707547	0.203643491	-8.999588151	2.27E-19	3.70E-18	1.832707547	-3.562049455	ndk	nucleoside diphosphate kinase	PA3807	ndk	nucleoside diphosphate kinase
PALES_11661	128.9858152	1.62282307	0.252163152	6.435607486	1.23E-10	8.53E-10	1.62282307	3.079770975	PALES_11661	hypothetical protein	PA3808	PA3808	conserved hypothetical protein
PALES_11651	128.4703087	0.972488172	0.262804206	3.700428489	2.15E-04	6.20E-04	0.972488172	1.962221863	fdx2	ferredoxin	PA3809	fdx2	ferredoxin [2Fe-2S]
PALES_11641	330.0269497	1.094331988	0.202315479	5.409037375	6.34E-08	3.22E-07	1.094331988	2.135141951	hscA	chaperone protein HscA	PA3810	hscA	heat shock protein HscA
PALES_11631	413.8317134	0.818136464	0.222070052	3.684136861	2.29E-04	6.56E-04	0.818136464	1.763127082	hscB	co-chaperone HscB	PA3811	hscB	heat shock protein HscB
PALES_11621	174.3816652	0.834042955	0.235280576	3.544886576	3.93E-04	0.001074614	0.834042955	1.782674068	iscA	putative iron-binding protein IscA	PA3812	iscA	probable iron-binding protein IscA
PALES_11611	495.0797031	0.740919748	0.219473771	3.375891998	7.36E-04	0.001900368	0.740919748	1.67124095	iscU	scaffold protein	PA3813	iscU	probable iron-binding protein IscU
PALES_11601	1559.895674	0.884118539	0.227660354	3.883498042	1.03E-04	3.16E-04	0.884118539	1.845636626	iscS	cysteine desulfurase	PA3814	iscS	L-cysteine desulfurase (pyridoxal phosphate-dependent)
PALES_11591	555.7045755	1.327217555	0.208616582	6.361994545	1.99E-10	1.35E-09	1.327217555	2.509182759	PALES_11591	putative Rrf2 family protein	PA3815	iscR	IscR
PALES_11561	181.9449906	-1.3719159	0.221986808	-6.180168611	6.40E-10	4.17E-09	1.3719159	-2.588140433	PALES_11561	extragenic suppressor protein SuhB	PA3818	PA3818	extragenic suppressor protein SuhB
PALES_11541	124.9533509	-1.835834687	0.240538979	-7.632171292	2.31E-14	2.35E-13	1.835834687	-3.569778816	secF	preprotein translocase subunit SecF	PA3820	secF	secretion protein SecF
PALES_11531	362.1542416	-2.250430289	0.208387843	-10.79923979	3.47E-27	1.12E-25	2.250430289	-4.758247412	secD	preprotein translocase subunit SecD	PA3821	secD	secretion protein SecD
PALES_11521	159.8781462	-1.703042356	0.234274171	-7.269441383	3.61E-13	3.24E-12	1.703042356	-3.255868328	yajC	preprotein translocase subunit YajC	PA3822	PA3822	conserved hypothetical protein
PALES_11511	71.91879311	-2.155390695	0.284198978	-7.584090237	3.35E-14	3.36E-13	2.155390695	-4.454892735	tgt	queuine tRNA-ribosyltransferase	PA3823	tgt	queuine tRNA-ribosyltransferase
PALES_11501	51.8899715	-0.927356186	0.303695926	-3.053568081	0.002261374	0.005260682	0.927356186	-1.901787675	queA	S-adenosylmethionine:tRNA ribosyltransferase-isomerase	PA3824	queA	S-adenosylmethionine:trna ribosyltransferase-isomerase
PALES_11491	84.35549241	1.492438862	0.300417756	4.967878337	6.77E-07	2.93E-06	1.492438862	2.813642168	PALES_11491	hypothetical protein	PA3825	PA3825	Cyclic-guanylate-specific phosphodiesterase
PALES_11461	162.016988	-0.604546777	0.228056743	-2.650861223	0.008028682	0.016396774	0.604546777	-1.520501012	PALES_11461	putative permease	PA3828	lptF	Lipopolysaccharide export system permease protein LptF
PALES_11411	220.4986764	1.473682561	0.224806836	6.555328076	5.55E-11	4.03E-10	1.473682561	2.77729911	PALES_11411	hypothetical protein	PA3833	PA3833	hypothetical protein
PALES_11401	612.4579991	-0.595957806	0.190722546	-3.124737042	0.001779641	0.004233212	0.595957806	-1.511475722	valS	valyl-tRNA synthetase	PA3834	valS	valyl-tRNA synthetase
PALES_11381	304.5521891	-0.752923302	0.233115302	-3.229832168	0.001238629	0.003048151	0.752923302	-1.685204066	PALES_11381	putative ABC-type transport protein, periplasmic c	PA3836	PA3836	hypothetical protein
PALES_11371	24.2055447	-1.768725934	0.406893439	-4.346902076	1.38E-05	4.91E-05	1.768725934	-3.407528996	PALES_11371	putative permease of ABC transporter	PA3837	PA3837	probable permease of ABC transporter
PALES_11361	40.0481265	-1.203751956	0.34898869	-3.449257783	5.62E-04	0.001485785	1.203751956	-2.303379228	PALES_11361	putative ATP-binding component of ABC transporter	PA3838	PA3838	probable ATP-binding component of ABC transporter
PALES_11341	44.38446965	-0.919540878	0.33776323	-2.722442224	0.006480136	0.013622037	0.919540878	-1.891513245	PALES_11341	putative SAM-dependent methyltransferase	PA3840	PA3840	conserved hypothetical protein
PALES_11321	69.72349596	1.734376911	0.306620929	5.656420509	1.55E-08	8.56E-08	1.734376911	3.327357569	PALES_11321	putative chaperone	PA3842	spcS	specific Pseudomonas chaperone for ExoS, SpcS
PALES_11291	22.0943535	1.557353072	0.440345267	3.536663588	4.05E-04	0.00110672	1.557353072	2.943133679	PALES_11291	putative transcriptional regulator	PA3845	PA3845	probable transcriptional regulator
PALES_11281	121.0132737	1.601855855	0.315995251	5.069240285	3.99E-07	1.79E-06	1.601855855	3.035335219	PALES_11281	putative hydrolase, isochorismatase family	PA3846	PA3846	hypothetical protein
PALES_11261	111.5687617	0.757960155	0.255584502	2.965595133	0.003020979	0.006850145	0.757960155	1.691097868	PALES_11261	putative periplasmic transport protein	PA3848	PA3848	hypothetical protein
PALES_11181	76.35840334	1.034107436	0.279181297	3.704071322	2.12E-04	6.11E-04	1.034107436	2.047846296	PALES_11181	hypothetical protein	PA3856	PA3856	hypothetical protein
PALES_11171	639.6124893	1.33224024	0.245071272	5.436133862	5.44E-08	2.81E-07	1.33224024	2.517933603	pcs	phosphatidylcholine synthase	PA3857	pcs	phosphatidylcholine synthase
PALES_11161	433.2012319	1.819941197	0.217508597	8.367214995	5.90E-17	7.69E-16	1.819941197	3.530668075	PALES_11161	putative amino acid-binding protein	PA3858	PA3858	probable amino acid-binding protein
PALES_11151	38.85566605	-1.730345846	0.38012629	-4.552028865	5.31E-06	2.02E-05	1.730345846	-3.318073503	PALES_11151	carboxylesterase	PA3859	PA3859	carboxylesterase
PALES_11131	407.9531856	-1.057805974	0.216279029	-4.890931776	1.00E-06	4.25E-06	1.057805974	-2.081763204	rhl	ATP-dependent RNA helicase RhlB	PA3861	rhl	ATP-dependent RNA helicase RhlB
PALES_11091	297.5943089	2.056114899	0.218252249	9.420818832	4.48E-21	8.48E-20	2.056114899	4.158648932	PALES_11091	putative amino acid binding protein	PA3865	PA3865	probable amino acid binding protein
PALES_11091	297.5943089	2.056114899	0.218252249	9.420818832	4.48E-21	8.48E-20	2.056114899	4.158648932	PALES_11091	putative amino acid binding protein	PA3865	PA3865	pyocin S4 immunity protein
PALES_11071	21.94327372	-1.079131336	0.401384115	-2.688525271	0.00717684	0.014863186	1.079131336	-2.112763578	PALES_11071	putative peptidyl-prolyl cis-trans isomerase, PpiC-type	PA3871	PA3871	probable peptidyl-prolyl cis-trans isomerase, PpiC-type
PALES_11061	14.52668582	-1.659783659	0.529007607	-3.137542137	0.001703708	0.004068875	1.659783659	-3.159691396	narI	respiratory nitrate reductase gamma chain	PA3872	narI	respiratory nitrate reductase gamma chain
PALES_11041	42.09261393	-0.969687333	0.371860614	-2.607663453	0.009116254	0.018386101	0.969687333	-1.958416113	narH	respiratory nitrate reductase beta chain	PA3874	narH	respiratory nitrate reductase beta chain
PALES_11031	138.6748784	-1.603700429	0.321765552	-4.984065002	6.23E-07	2.72E-06	1.603700429	-3.039218564	narG	respiratory nitrate reductase alpha chain	PA3875	narG	respiratory nitrate reductase alpha chain
PALES_11011	30.94262259	-3.050542431	0.470964325	-6.477226127	9.34E-11	6.60E-10	3.050542431	-8.285233923	narK1	nitrite extrusion protein 1	PA3877	narK1	nitrite extrusion protein 1
PALES_11001	157.9893522	0.824012596	0.238884139	3.449423639	5.62E-04	0.001485785	0.824012596	1.770322986	narX	two-component sensor NarX	PA3878	narX	two-component sensor NarX
PALES_10991	80.80251634	-1.356513912	0.263918887	-5.139889487	2.75E-07	1.27E-06	1.356513912	-2.560656814	narL	transcriptional regulator NarL	PA3879	narL	two-component response regulator NarL
PALES_10981	26.35611345	-1.361725661	0.391723719	-3.47624	5.08E-04	0.001358373	1.361725661	-2.569923939	PALES_10981	hypothetical protein	PA3880	PA3880	conserved hypothetical protein
PALES_10891	32.37905904	-1.237139208	0.420926837	-2.939083704	0.003291842	0.007411319	1.237139208	-2.357306265	PALES_10891	putative permease of ABC transporter	PA3888	opuCD	OpuC ABC transporter, permease protein, OpuCD
PALES_10861	57.76089319	-0.760874963	0.315167021	-2.414196009	0.015769976	0.030066655	0.760874963	-1.694518001	PALES_10861	putative ATP-binding component of ABC transporter	PA3891	opuCA	OpuC ABC transporter, ATP-binding protein, OpuCA
PALES_10851	17.83759326	-1.264585106	0.43719537	-2.892494281	0.003821961	0.008476412	1.264585106	-2.40258106	PALES_10851	putative fusaric acid resistance protein	PA3892	PA3892	conserved hypothetical protein
PALES_10801	94.65618344	4.977884708	0.476350087	10.4500552	1.46E-25	4.22E-24	4.977884708	31.51320772	PALES_10801	hypothetical protein	PA3897	PA3897	hypothetical protein
PALES_10791	119.8294816	2.838514877	0.300209301	9.455119692	3.23E-21	6.24E-20	2.838514877	7.152833588	PALES_10791	putative transcriptional regulator	PA3898	PA3898	probable transcriptional regulator
PALES_10781	134.3201365	3.515497758	0.345150746	10.18539812	2.30E-24	6.02E-23	3.515497758	11.43589805	PALES_10781	RNA polymerase sigma factor	PA3899	fecI	FecI
PALES_10771	28.06613385	2.87341353	0.486808165	5.902558203	3.58E-09	2.14E-08	2.87341353	7.32796966	PALES_10771	putative transmembrane sensor	PA3900	fecR	FecR
PALES_10761	72.48619558	2.753687027	0.342270661	8.045349301	8.60E-16	9.95E-15	2.753687027	6.744385621	fecA	Fe(III) dicitrate transport protein FecA	PA3901	fecA	Fe(III) dicitrate transport protein FecA
PALES_10741	301.4130571	-1.253072845	0.246776589	-5.07776223	3.82E-07	1.72E-06	1.253072845	-2.383485493	prfC	peptide chain release factor 3	PA3903	prfC	peptide chain release factor 3
PALES_10731	45.97668021	-1.152921778	0.339029245	-3.400655834	6.72E-04	0.001758262	1.152921778	-2.223637748	PALES_10731	hypothetical protein	PA3904	PA3904	hypothetical protein
PALES_10721	56.32214136	-2.288105957	0.318403548	-7.186182345	6.66E-13	5.83E-12	2.288105957	-4.884144749	PALES_10721	hypothetical protein	PA3905	PA3905	hypothetical protein
PALES_10711	34.58467372	-1.883367943	0.364063934	-5.173179115	2.30E-07	1.07E-06	1.883367943	-3.689353278	PALES_10711	hypothetical protein	PA3906	PA3906	hypothetical protein
PALES_10701	124.1348901	-2.239832505	0.290436329	-7.711957085	1.24E-14	1.29E-13	2.239832505	-4.723422231	PALES_10701	hypothetical protein	PA3907	PA3907	hypothetical protein
PALES_10691	144.142748	-2.033330595	0.244740741	-8.308100171	9.72E-17	1.24E-15	2.033330595	-4.093487799	PALES_10691	hypothetical protein	PA3908	PA3908	hypothetical protein
PALES_10661	17.57946051	-1.670432572	0.470304486	-3.551810839	3.83E-04	0.001047935	1.670432572	-3.1831002	PALES_10661	Putative lipid carrier protein	PA3911	PA3911	conserved hypothetical protein
PALES_10651	20.47239013	-2.49990852	0.485199501	-5.152331184	2.57E-07	1.19E-06	2.49990852	-5.656495564	PALES_10651	putative peptidase	PA3912	PA3912	conserved hypothetical protein
PALES_10641	26.79513387	-2.507002917	0.427807819	-5.860114764	4.63E-09	2.73E-08	2.507002917	-5.684379666	PALES_10641	putative protease	PA3913	PA3913	probable protease
PALES_10581	1145.883723	2.212477869	0.198622892	11.13908796	8.09E-29	2.98E-27	2.212477869	4.634706141	PALES_10581	hypothetical protein	PA3919	PA3919	conserved hypothetical protein
PALES_10561	313.1772782	0.90521904	0.239069714	3.786422903	1.53E-04	4.52E-04	0.90521904	1.87282882	PALES_10561	putative transcriptional regulator	PA3921	PA3921	probable transcriptional regulator
PALES_10531	518.5533763	1.055521974	0.229350483	4.602222583	4.18E-06	1.62E-05	1.055521974	2.078470071	PALES_10531	acyl-CoA synthetase	PA3924	PA3924	probable medium-chain acyl-CoA ligase
PALES_10501	21.90171685	1.559817427	0.457412187	3.410091532	6.49E-04	0.001704166	1.559817427	2.948165321	PALES_10501	putative transcriptional regulator	PA3927	PA3927	probable transcriptional regulator
PALES_10491	112.3867508	1.493033094	0.261245443	5.715058904	1.10E-08	6.19E-08	1.493033094	2.814801318	PALES_10491	hypothetical protein	PA3928	PA3928	hypothetical protein
PALES_10481	109.138711	1.173140982	0.262374145	4.47125223	7.78E-06	2.86E-05	1.173140982	2.255021177	cioB	cyanide insensitive terminal oxidase	PA3929	cioB	cyanide insensitive terminal oxidase
PALES_10471	359.9483838	1.90797768	0.213026055	8.956546109	3.35E-19	5.40E-18	1.90797768	3.752826726	cioA	cyanide insensitive terminal oxidase	PA3930	cioA	cyanide insensitive terminal oxidase
PALES_10381	34.41595125	-2.639886053	0.435670861	-6.059358766	1.37E-09	8.55E-09	2.639886053	-6.232824337	PALES_10381	putative periplasmic taurine-binding protein precursor	PA3938	PA3938	probable periplasmic taurine-binding protein precursor
PALES_10371	8.380345824	1.892246552	0.7098091	2.665852763	0.007679332	0.015746107	1.892246552	3.712128242	PALES_10371	hypothetical protein	PA3939	PA3939	hypothetical protein
PALES_10361	747.5312169	-1.543381709	0.233514047	-6.609374172	3.86E-11	2.84E-10	1.543381709	-2.914769316	PALES_10361	putative DNA binding protein	PA3940	PA3940	probable DNA binding protein
PALES_10351	20.58032171	1.587366703	0.45835166	3.463207052	5.34E-04	0.00141794	1.587366703	3.005003565	PALES_10351	putative phosphatase/hydrolase	PA3941	PA3941	hypothetical protein
PALES_10341	96.95684715	0.796344257	0.25504331	3.122388339	0.001793901	0.00426074	0.796344257	1.736694818	tesB	acyl-CoA thioesterase II	PA3942	tesB	acyl-CoA thioesterase II
PALES_10331	87.95389243	1.845164387	0.28679105	6.433828353	1.24E-10	8.61E-10	1.845164387	3.592938864	PALES_10331	hypothetical protein	PA3943	PA3943	conserved hypothetical protein
PALES_10321	55.51870356	0.959688758	0.366164237	2.620924329	0.008769172	0.017751134	0.959688758	1.944890265	PALES_10321	putative acetyltransferase	PA3944	PA3944	conserved hypothetical protein
PALES_10311	378.4967059	1.582111816	0.226860239	6.973949365	3.08E-12	2.52E-11	1.582111816	2.994078021	PALES_10311	putative acetyltransferase, GNAT family	PA3945	PA3945	conserved hypothetical protein
PALES_10291	26.07690904	1.466382906	0.43904746	3.339918891	8.38E-04	0.00213893	1.466382906	2.763282202	rocR	RocR	PA3947	rocR	RocR
PALES_10271	132.532501	0.615516056	0.237593519	2.590626461	0.009580142	0.01922903	0.615516056	1.532105938	rocA1	two-component response regulator RocA1	PA3948	rocA1	Two-component response regulator RocA1
PALES_10251	110.072882	0.792868238	0.250560678	3.164376174	0.001554158	0.003742276	0.792868238	1.732515475	PALES_10251	putative ATP-dependent RNA helicase	PA3950	PA3950	probable ATP-dependent RNA helicase
PALES_10241	123.3285191	2.825571014	0.290981116	9.710496189	2.72E-22	5.85E-21	2.825571014	7.088945378	PALES_10241	hypothetical protein	PA3951	PA3951	conserved hypothetical protein
PALES_10231	195.8710248	2.409173818	0.294284175	8.186555791	2.69E-16	3.29E-15	2.409173818	5.311700555	PALES_10231	hypothetical protein	PA3952	PA3952	hypothetical protein
PALES_10181	89.68160961	2.325099016	0.327633462	7.096646974	1.28E-12	1.09E-11	2.325099016	5.011001661	PALES_10181	short chain dehydrogenase	PA3957	PA3957	probable short-chain dehydrogenase
PALES_10171	59.70692807	-0.663713638	0.285454994	-2.325107816	0.020066196	0.03747634	0.663713638	-1.58415515	PALES_10171	putative nuclease or phosphatase	PA3958	PA3958	hypothetical protein
PALES_10131	133.6335912	-0.65490927	0.269441483	-2.43061782	0.015073104	0.028993775	0.65490927	-1.57451693	PALES_10131	hypothetical protein	PA3962	PA3962	hypothetical protein
PALES_10091	172.3634824	0.651511606	0.231521526	2.814043334	0.004892263	0.010588399	0.651511606	1.570813177	PALES_10091	hypothetical protein	PA3966	PA3966	hypothetical protein
PALES_10081	49.60887065	-0.781181774	0.319073078	-2.448284825	0.014353814	0.027733598	0.781181774	-1.718538026	PALES_10081	hypothetical protein	PA3967	PA3967	hypothetical protein
PALES_10061	57.15726967	1.568944969	0.310114174	5.059249462	4.21E-07	1.88E-06	1.568944969	2.966876696	PALES_10061	hypothetical protein	PA3969	PA3969	conserved hypothetical protein
PALES_10051	182.2572737	0.816912575	0.224362666	3.641036133	2.72E-04	7.68E-04	0.816912575	1.761631993	amn	AMP nucleosidase	PA3970	amn	AMP nucleosidase
PALES_10041	51.71138641	1.842357622	0.322295673	5.716358539	1.09E-08	6.15E-08	1.842357622	3.585955592	PALES_10041	hypothetical protein	PA3971	PA3971	hypothetical protein
PALES_10031	228.9541068	0.983460329	0.227889569	4.315512695	1.59E-05	5.60E-05	0.983460329	1.97720208	PALES_10031	putative acyl-CoA dehydrogenase	PA3972	PA3972	probable acyl-CoA dehydrogenase
PALES_10021	60.78545319	1.657783197	0.322584583	5.139065172	2.76E-07	1.27E-06	1.657783197	3.155313159	PALES_10021	putative transcriptional regulator	PA3973	PA3973	probable transcriptional regulator
PALES_10011	290.5518945	0.989301681	0.222448459	4.447329899	8.69E-06	3.18E-05	0.989301681	1.985223834	ladS	Lost Adherence Sensor, LadS	PA3974	ladS	Lost Adherence Sensor, LadS
PALES_09981	204.6032504	-1.33903223	0.224432265	-5.96630893	2.43E-09	1.47E-08	1.33903223	-2.5298156	hemL	glutamate-1-semialdehyde aminotransferase	PA3977	hemL	glutamate-1-semialdehyde 2,1-aminomutase
PALES_09971	194.9744537	0.685653751	0.21795606	3.145834762	0.001656135	0.003965219	0.685653751	1.60843067	PALES_09971	hypothetical protein	PA3978	PA3978	hypothetical protein
PALES_09961	40.71209694	-0.849964378	0.327512681	-2.595210589	0.009453298	0.018990465	0.849964378	-1.80245642	PALES_09961	hypothetical protein	PA3979	PA3979	hypothetical protein
PALES_09951	172.374875	-1.155804014	0.235392667	-4.910110536	9.10E-07	3.88E-06	1.155804014	-2.228084602	PALES_09951	hypothetical protein	PA3980	PA3980	conserved hypothetical protein
PALES_09911	33.31222317	-1.650943477	0.359395918	-4.593662293	4.36E-06	1.68E-05	1.650943477	-3.140389435	lnt	apolipoprotein N-acyltransferase	PA3984	lnt	apolipoprotein N-acyltransferase
PALES_09901	32.07465051	2.271280676	0.418828966	5.42293122	5.86E-08	2.99E-07	2.271280676	4.827514779	PALES_09901	hypothetical protein	PA3985	PA3985	conserved hypothetical protein
PALES_09891	322.2245799	1.780137761	0.268212715	6.637037186	3.20E-11	2.39E-10	1.780137761	3.434589694	PALES_09891	hypothetical protein	PA3986	PA3986	hypothetical protein
PALES_09881	1057.184923	-0.648647104	0.191813605	-3.381653268	7.21E-04	0.001867044	0.648647104	-1.567697389	leuS	leucyl-tRNA synthetase	PA3987	leuS	leucyl-tRNA synthetase
PALES_09871	284.9016334	-0.802268376	0.22550412	-3.557666152	3.74E-04	0.001028411	0.802268376	-1.743840845	PALES_09871	hypothetical protein	PA3988	lptE	LPS-assembly lipoprotein LptE
PALES_09861	55.4272051	-1.469533012	0.313109805	-4.693347156	2.69E-06	1.07E-05	1.469533012	-2.769322386	holA	DNA polymerase III subunit delta	PA3989	holA	DNA polymerase III, delta subunit
PALES_09831	161.6687838	-0.669766953	0.232185757	-2.884616874	0.003918903	0.008663125	0.669766953	-1.590815973	PALES_09831	putative murein transglycosylase	PA3992	sltB3	SltB3
PALES_09811	46.55287015	1.730821388	0.344516053	5.023920872	5.06E-07	2.23E-06	1.730821388	3.31916739	PALES_09811	putative transcriptional regulator	PA3995	PA3995	probable transcriptional regulator
PALES_09771	629.4551137	-1.027469144	0.233417543	-4.40185057	1.07E-05	3.87E-05	1.027469144	-2.038445159	dacC	D-ala-D-ala-carboxypeptidase	PA3999	dacC	D-ala-D-ala-carboxypeptidase
PALES_09741	60.35444296	-0.770519889	0.277642039	-2.775227736	0.005516307	0.011762349	0.770519889	-1.705884404	rodA	rod shape-determining protein	PA4002	rodA	rod shape-determining protein
PALES_09731	208.3461454	-0.759601113	0.265072541	-2.865634859	0.00416174	0.009165851	0.759601113	-1.693022461	pbpA	penicillin-binding protein 2	PA4003	pbpA	penicillin-binding protein 2
PALES_09691	202.1500238	-0.596198201	0.230231965	-2.589554416	0.009610023	0.019272738	0.596198201	-1.511727599	proA	gamma-glutamyl phosphate reductase	PA4007	proA	gamma-glutamyl phosphate reductase
PALES_09671	25.76169142	1.957340972	0.431279625	4.538449905	5.67E-06	2.14E-05	1.957340972	3.883455601	PALES_09671	putative O-methyltransferase	PA4009	PA4009	hypothetical protein
PALES_09641	103.5512943	1.5640462	0.338913285	4.614886074	3.93E-06	1.53E-05	1.5640462	2.956819549	PALES_09641	hypothetical protein	PA4012	PA4012	hypothetical protein
PALES_09591	309.1975313	1.045633564	0.227260872	4.601027684	4.20E-06	1.63E-05	1.045633564	2.064272692	PALES_09591	hypothetical protein	PA4017	PA4017	conserved hypothetical protein
PALES_09551	99.4539548	1.038586783	0.262843032	3.951357496	7.77E-05	2.45E-04	1.038586783	2.054214426	PALES_09551	putative transcriptional regulator	PA4021	PA4021	probable transcriptional regulator
PALES_09531	164.3337326	3.093126108	0.335270216	9.22577063	2.82E-20	4.98E-19	3.093126108	8.533432133	PALES_09531	putative transport protein	PA4023	PA4023	probable transport protein
PALES_09521	237.4374157	2.042355989	0.241595349	8.453622972	2.82E-17	3.73E-16	2.042355989	4.119176626	eutB	ethanolamine ammonia-lyase large subunit	PA4024	eutB	ethanolamine ammonia-lyase large subunit
PALES_09511	95.10592522	2.498543814	0.288356944	8.664760338	4.52E-18	6.58E-17	2.498543814	5.651147377	PALES_09511	ethanolamine ammonia-lyase small subunit	PA4025	PA4025	probable ethanolamine ammonia-lyase light chain
PALES_09501	157.9697818	1.880963264	0.256139054	7.343523894	2.08E-13	1.94E-12	1.880963264	3.683209	PALES_09501	putative acetyltransferase	PA4026	PA4026	probable acetyltransferase
PALES_09491	179.0504365	2.040956752	0.239144471	8.534409101	1.41E-17	1.94E-16	2.040956752	4.115183467	PALES_09491	hypothetical protein	PA4027	PA4027	hypothetical protein
PALES_09471	38.85052007	-1.667785626	0.351983841	-4.73824486	2.16E-06	8.80E-06	1.667785626	-3.177265447	PALES_09471	hypothetical protein	PA4029	PA4029	conserved hypothetical protein
PALES_09461	36.91838461	-1.275029628	0.367290838	-3.471444144	5.18E-04	0.001381317	1.275029628	-2.420037877	PALES_09461	hypothetical protein	PA4030	PA4030	conserved hypothetical protein
PALES_09451	389.0576996	-2.622160097	0.211600382	-12.3920386	2.89E-35	1.78E-33	2.622160097	-6.156712059	ppa	inorganic pyrophosphatase	PA4031	ppa	inorganic pyrophosphatase
PALES_09411	24.83723663	-1.14906167	0.386486227	-2.973098628	0.002948097	0.006710484	1.14906167	-2.217696084	PALES_09411	hypothetical protein	PA4035	PA4035	hypothetical protein
PALES_09401	14.31615837	-1.183556062	0.487026652	-2.430166928	0.01509187	0.029018133	1.183556062	-2.271359492	PALES_09401	putative two-component sensor	PA4036	PA4036	probable two-component sensor
PALES_09361	43.14610916	1.506300875	0.353005616	4.267073404	1.98E-05	6.86E-05	1.506300875	2.840807108	PALES_09361	hypothetical protein	PA4040	PA4040	hypothetical protein
PALES_09351	46.89357437	1.174648495	0.323229033	3.634105773	2.79E-04	7.86E-04	1.174648495	2.257378744	PALES_09351	putative racemase	PA4041	PA4041	hypothetical protein
PALES_09331	76.25295228	-0.662552874	0.26201987	-2.528635995	0.011450672	0.022667753	0.662552874	-1.582881082	ispA	geranyltranstransferase	PA4043	ispA	geranyltranstransferase
PALES_09271	75.28227208	0.960373566	0.272418686	3.525358628	4.23E-04	0.001151739	0.960373566	1.945813672	PALES_09271	hypothetical protein	PA4049	PA4049	hypothetical protein
PALES_09161	594.5194797	1.871459226	0.20652321	9.061738039	1.28E-19	2.14E-18	1.871459226	3.659024881	PALES_09161	putative thioredoxin	PA4061	PA4061	probable thioredoxin
PALES_09101	3239.580508	-4.080600363	0.21120466	-19.3205982	3.60E-83	8.57E-80	4.080600363	-16.919328	oprG	Outer membrane protein OprG precursor	PA4067	oprG	Outer membrane protein OprG precursor
PALES_09071	158.8425521	0.719659295	0.23212664	3.100287392	0.00193333	0.004566807	0.719659295	1.646793084	PALES_09071	putative dTDP-4-rhamnose reductase-related protein	PA4069	PA4069	hypothetical protein
PALES_09061	28.02516319	2.25755989	0.442922037	5.096968991	3.45E-07	1.57E-06	2.25755989	4.781820218	PALES_09061	DNA-binding transcriptional activator FeaR	PA4070	PA4070	probable transcriptional regulator
PALES_09031	22.27343103	-1.084682921	0.403121299	-2.690711021	0.007129993	0.014779039	1.084682921	-2.120909293	PALES_09031	putative aldehyde dehydrogenase	PA4073	PA4073	probable aldehyde dehydrogenase
PALES_09001	9.561062772	-1.644755444	0.584280257	-2.815011159	0.004877554	0.010575818	1.644755444	-3.126948467	PALES_09001	hypothetical protein	PA4076	PA4076	hypothetical protein
PALES_08981	240.2269216	-1.559658783	0.253060014	-6.163197251	7.13E-10	4.61E-09	1.559658783	-2.947841148	PALES_08981	putative nonribosomal peptide synthetase	PA4078	PA4078	probable nonribosomal peptide synthetase
PALES_08961	32.25555208	-1.311804056	0.366658355	-3.577728528	3.47E-04	9.63E-04	1.311804056	-2.48251779	PALES_08961	putative response regulator	PA4080	PA4080	probable response regulator
PALES_08921	11.55169863	1.518581238	0.576269782	2.635191512	0.008408982	0.017087483	1.518581238	2.865091548	cupB3	usher CupB3	PA4084	cupB3	usher CupB3
PALES_08861	323.5080734	2.029091689	0.336199483	6.035380161	1.59E-09	9.87E-09	2.029091689	4.081478024	PALES_08861	hypothetical protein	PA4090	PA4090	hypothetical protein
PALES_08851	68.20025691	1.019971133	0.288724475	3.532679839	4.11E-04	0.001122241	1.019971133	2.027878384	hpaA	4-hydroxyphenylacetate 3-monooxygenase large chain	PA4091	hpaA	4-hydroxyphenylacetate 3-monooxygenase large chain
PALES_08791	27.50892929	0.956660374	0.387134983	2.471128719	0.013468733	0.026258231	0.956660374	1.940811998	PALES_08791	putative transcriptional regulator	PA4094	PA4094	probable transcriptional regulator
PALES_08671	11.43238458	-1.969111552	0.570405919	-3.452123279	5.56E-04	0.00147255	1.969111552	-3.915269327	PALES_08671	hypothetical protein	PA4105	PA4105	hypothetical protein
PALES_08661	20.08108518	-3.074216253	0.510594256	-6.020859458	1.73E-09	1.08E-08	3.074216253	-8.422311609	PALES_08661	hypothetical protein	PA4106	PA4106	conserved hypothetical protein
PALES_08651	309.6633298	-6.197202783	0.411440368	-15.06221378	2.87E-51	5.46E-49	6.197202783	-73.37429252	PALES_08651	hypothetical protein	PA4107	efhP	EfhP
PALES_08641	281.2759229	2.09207005	0.237023459	8.826426125	1.08E-18	1.66E-17	2.09207005	4.263593957	PALES_08641	putative HDIG domain protein	PA4108	PA4108	cyclic di-GMP phosphodiesterase
PALES_08601	26.86547969	0.865950909	0.37843656	2.28823269	0.022123974	0.0407592	0.865950909	1.822540544	PALES_08601	hypothetical protein	PA4111	PA4111	hypothetical protein
PALES_08591	409.1521175	1.049226368	0.206145939	5.089726101	3.59E-07	1.63E-06	1.049226368	2.069419842	PALES_08591	putative sensor/response regulator hybrid	PA4112	PA4112	probable sensor/response regulator hybrid
PALES_08561	433.8745263	1.63120262	0.210335613	7.755237444	8.82E-15	9.40E-14	1.63120262	3.097711141	PALES_08561	putative decarboxylase family protein	PA4115	PA4115	conserved hypothetical protein
PALES_08551	53.05248693	1.430308599	0.364710293	3.921766474	8.79E-05	2.73E-04	1.430308599	2.695043573	PALES_08551	putative heme oxygenase	PA4116	bphO	heme oxygenase, BphO
PALES_08491	23.00502758	-1.038885899	0.420649724	-2.469717296	0.013521987	0.026329667	1.038885899	-2.054640374	PALES_08491	putative 4-hydroxyphenylacetate degradation bifunctional isomerase	PA4122	PA4122	conserved hypothetical protein
PALES_08421	301.9543097	-1.244992102	0.223340537	-5.574411707	2.48E-08	1.33E-07	1.244992102	-2.370172567	PALES_08421	hypothetical protein	PA4129	PA4129	hypothetical protein
PALES_08411	1071.580485	-1.068079449	0.195313966	-5.46852574	4.54E-08	2.36E-07	1.068079449	-2.096640409	PALES_08411	putative sulfite or nitrite reductase	PA4130	PA4130	probable sulfite or nitrite reductase
PALES_08401	577.0382183	-2.826605341	0.226563956	-12.475971	1.01E-35	6.67E-34	2.826605341	-7.094029557	PALES_08401	putative iron-sulfur protein	PA4131	PA4131	probable iron-sulfur protein
PALES_08391	336.4674096	-2.632192818	0.209815828	-12.54525385	4.22E-36	2.91E-34	2.632192818	-6.199675988	PALES_08391	putative transcriptional regulator, GntR family	PA4132	PA4132	conserved hypothetical protein
PALES_08361	54.00049426	-2.191548998	0.335848752	-6.52540462	6.78E-11	4.86E-10	2.191548998	-4.567956772	PALES_08361	putative transcriptional regulator	PA4135	PA4135	probable transcriptional regulator
PALES_08331	35.60198282	-1.424976444	0.367452332	-3.877989932	1.05E-04	3.22E-04	1.424976444	-2.685101163	tyrS	tyrosyl-tRNA synthetase	PA4138	tyrS	tyrosyl-tRNA synthetase
PALES_07881	84.76414353	-3.272280789	0.318888185	-10.26153036	1.05E-24	2.85E-23	3.272280789	-9.661724994	PALES_07881	hypothetical protein	PA4139	PA4139	hypothetical protein
PALES_07871	12.25352523	-1.26264636	0.51105702	-2.470656524	0.013486528	0.026282149	1.26264636	-2.399354552	PALES_07871	putative cholesterol oxidase	PA4140	PA4140	hypothetical protein
PALES_07861	23159.97041	-3.097468159	0.210808934	-14.69324897	7.12E-49	1.25E-46	3.097468159	-8.559153723	PALES_07861	hypothetical protein	PA4141	PA4141	hypothetical protein
PALES_07851	441.746621	-2.460433561	0.259686967	-9.474613194	2.68E-21	5.28E-20	2.460433561	-5.503821042	PALES_07851	putative secretion protein	PA4142	PA4142	probable secretion protein
PALES_07841	59.58914505	-2.519260546	0.313280278	-8.041554875	8.87E-16	1.02E-14	2.519260546	-5.732881848	PALES_07841	putative toxin transporter	PA4143	PA4143	probable toxin transporter
PALES_07831	48.08116133	-2.136552084	0.329688965	-6.480508338	9.14E-11	6.48E-10	2.136552084	-4.39709921	PALES_07831	putative outer membrane protein precursor	PA4144	PA4144	probable outer membrane protein precursor
PALES_07821	27.48373407	-0.873037868	0.364356564	-2.396108524	0.016570183	0.031428489	0.873037868	-1.831515446	PALES_07821	putative transcriptional regulator	PA4145	PA4145	probable transcriptional regulator
PALES_07801	79.97038844	1.970105237	0.323173473	6.096122982	1.09E-09	6.87E-09	1.970105237	3.917966974	acoR	transcriptional regulator AcoR	PA4147	acoR	transcriptional regulator AcoR
PALES_07721	47.25654831	3.05332841	0.402171725	7.592101128	3.15E-14	3.16E-13	3.05332841	8.301248947	PALES_07721	putative oxidoreductase	PA4155	PA4155	hypothetical protein
PALES_07711	168.7238291	2.422393063	0.311266359	7.782379934	7.12E-15	7.67E-14	2.422393063	5.360594707	PALES_07711	putative TonB-dependent receptor	PA4156	fvbA	FvbA
PALES_07701	31.53072843	-0.870558479	0.355010573	-2.452204373	0.014198399	0.027482093	0.870558479	-1.828370541	PALES_07701	putative transcriptional regulator	PA4157	PA4157	probable transcriptional regulator
PALES_07691	21.38228525	3.238199919	0.575875211	5.62309309	1.88E-08	1.03E-07	3.238199919	9.436160247	fepC	ferric enterobactin transport protein FepC	PA4158	fepC	ferric enterobactin transport protein FepC
PALES_07681	64.54049327	3.125075206	0.389191209	8.029665462	9.77E-16	1.12E-14	3.125075206	8.724516646	fepB	iron-enterobactin transporter periplasmic binding protein	PA4159	fepB	ferrienterobactin-binding periplasmic protein precursor FepB
PALES_07671	16.80160079	3.989861655	0.752335204	5.303303149	1.14E-07	5.57E-07	3.989861655	15.8879563	fepD	ferric enterobactin transport protein FepD	PA4160	fepD	ferric enterobactin transport protein FepD
PALES_07661	18.78825824	4.107153634	0.73671191	5.574979283	2.48E-08	1.33E-07	4.107153634	17.23361714	fepG	ferric enterobactin transport protein FepG	PA4161	fepG	ferric enterobactin transport protein FepG
PALES_07631	32.42664693	0.980604995	0.362342298	2.706294569	0.006803866	0.014220828	0.980604995	1.973292737	PALES_07631	hypothetical protein	PA4164	PA4164	hypothetical protein
PALES_07601	23.88543984	2.297181778	0.465467673	4.935212285	8.01E-07	3.44E-06	2.297181778	4.914967164	dkgB	2,5-diketo-D-gluconate reductase B	PA4167	PA4167	probable oxidoreductase
PALES_07591	121.2693221	1.832947297	0.308646743	5.938657514	2.87E-09	1.73E-08	1.832947297	3.562641453	fpvB	second ferric pyoverdine receptor FpvB	PA4168	fpvB	second ferric pyoverdine receptor FpvB
PALES_07561	53.67310234	0.80697321	0.321712705	2.508365999	0.012129096	0.023861751	0.80697321	1.749537042	PALES_07561	putative protease	PA4171	PA4171	probable protease
PALES_07521	712.8744515	-1.521288521	0.235903791	-6.44876674	1.13E-10	7.91E-10	1.521288521	-2.87047307	piv	protease IV	PA4175	piv	protease IV
PALES_07511	79.31867951	1.219898264	0.283174666	4.307935734	1.65E-05	5.77E-05	1.219898264	2.329302909	ppiC2	peptidyl-prolyl cis-trans isomerase C2	PA4176	ppiC2	peptidyl-prolyl cis-trans isomerase C2
PALES_07471	265.5391025	0.984278901	0.23683983	4.155884167	3.24E-05	1.09E-04	0.984278901	1.978324244	PALES_07471	acetolactate synthase	PA4180	PA4180	probable acetolactate synthase large subunit
PALES_07461	14.78552939	-3.311966859	1.230374974	-2.691835359	0.007106002	0.014742163	3.311966859	-9.931191795	PALES_07461	hypothetical protein	PA4181	PA4181	hypothetical protein
PALES_07451	29.49023364	-1.44778067	0.367072526	-3.944127026	8.01E-05	2.51E-04	1.44778067	-2.727880924	PALES_07451	putative transcriptional regulator	PA4182	PA4182	hypothetical protein
PALES_07441	15.07535595	1.095070041	0.489775284	2.235862192	0.0253608	0.046097325	1.095070041	2.136234525	PALES_07441	hypothetical protein	PA4183	PA4183	hypothetical protein
PALES_07421	71.87224066	1.328445691	0.282353595	4.704900922	2.54E-06	1.02E-05	1.328445691	2.511319683	PALES_07421	putative transcriptional regulator	PA4185	PA4185	probable transcriptional regulator
PALES_07411	78.918889	2.112708472	0.307469487	6.871278496	6.36E-12	5.04E-11	2.112708472	4.325025001	PALES_07411	putative oxidoreductase	PA4186	PA4186	hypothetical protein
PALES_07311	45.83949091	2.306784553	0.38071176	6.059136576	1.37E-09	8.55E-09	2.306784553	4.947790973	PALES_07311	putative two-component response regulator	PA4196	bfiR	BfiR
PALES_07301	105.6566482	2.253636611	0.279868386	8.052487255	8.11E-16	9.48E-15	2.253636611	4.768834153	PALES_07301	putative two-component sensor	PA4197	bfiS	BfiS
PALES_07291	111.6935553	1.972525977	0.293122041	6.729367638	1.70E-11	1.31E-10	1.972525977	3.924546565	PALES_07291	acyl-CoA synthetase	PA4198	PA4198	probable AMP-binding enzyme
PALES_07281	161.0931008	0.729161568	0.231764683	3.146128905	0.001654471	0.003963228	0.729161568	1.657675443	PALES_07281	putative acyl-CoA dehydrogenase	PA4199	PA4199	probable acyl-CoA dehydrogenase
PALES_07271	58.72420466	0.834561337	0.295994366	2.81951764	0.004809589	0.010442737	0.834561337	1.783314725	PALES_07271	hypothetical protein	PA4200	PA4200	hypothetical protein
PALES_07261	149.9190981	0.834817245	0.257697585	3.239522968	0.001197298	0.002960558	0.834817245	1.783631081	ddlA	D-alanine-D-alanine ligase A	PA4201	ddlA	D-alanine-D-alanine ligase A
PALES_07251	64.14498985	0.679629373	0.280490223	2.423005577	0.01539269	0.029513001	0.679629373	1.60172822	PALES_07251	hypothetical protein	PA4202	nmoA	nitronate monooxygenase NmoA
PALES_07231	100.6664869	-0.649111454	0.291359775	-2.227869154	0.025889242	0.046914384	0.649111454	-1.568202054	PALES_07231	putative 3-carboxymuconate cyclase	PA4204	ppgL	periplasmic gluconolactonase, PpgL
PALES_07221	111.831126	-4.111976313	0.342229866	-12.01524682	2.95E-33	1.58E-31	4.111976313	-17.29132253	mexG	hypothetical protein	PA4205	mexG	hypothetical protein
PALES_07211	104.0477957	-3.634779284	0.378648847	-9.599340685	8.05E-22	1.64E-20	3.634779284	-12.42160149	mexH	putative Resistance-Nodulation-Cell Division (RND) efflux membrane fusion protein precursor	PA4206	mexH	probable Resistance-Nodulation-Cell Division (RND) efflux membrane fusion protein precursor
PALES_07201	178.1458467	-3.565120167	0.283646586	-12.56888095	3.13E-36	2.26E-34	3.565120167	-11.8360859	mexI	putative Resistance-Nodulation-Cell Division (RND) efflux transporter	PA4207	mexI	probable Resistance-Nodulation-Cell Division (RND) efflux transporter
PALES_07191	80.77694078	-3.638570948	0.354289976	-10.27003639	9.62E-25	2.63E-23	3.638570948	-12.45429065	opmD	putative outer membrane protein precursor	PA4208	opmD	probable outer membrane protein precursor
PALES_07181	121.3470082	-2.217330991	0.258675305	-8.57186964	1.02E-17	1.42E-16	2.217330991	-4.650323212	phzM	putative phenazine-specific methyltransferase	PA4209	phzM	probable phenazine-specific methyltransferase
PALES_07171	20.28719943	-2.950404118	0.502723578	-5.868839749	4.39E-09	2.59E-08	2.950404118	-7.729655509	phzA1	putative phenazine biosynthesis protein	PA4210	phzA1	probable phenazine biosynthesis protein
PALES_07101	332.3308994	-2.906210746	0.257149122	-11.30165534	1.29E-29	5.28E-28	2.906210746	-7.496466563	phzS	hypothetical protein	PA4217	phzS	flavin-containing monooxygenase
PALES_07091	275.9335313	1.392766265	0.225028504	6.189288194	6.04E-10	3.94E-09	1.392766265	2.625816801	PALES_07091	putative transporter	PA4218	ampP	AmpP
PALES_07081	152.5183428	1.919894426	0.281856794	6.811595335	9.65E-12	7.52E-11	1.919894426	3.783953674	PALES_07081	hypothetical protein	PA4219	ampO	AmpO
PALES_07071	62.3393241	1.648771797	0.344839071	4.781278959	1.74E-06	7.20E-06	1.648771797	3.135665782	PALES_07071	hypothetical protein	PA4220	PA4220	hypothetical protein
PALES_07061	3115.111544	1.415825818	0.195544957	7.240410803	4.47E-13	4.00E-12	1.415825818	2.668124188	fptA	Fe(III)-pyochelin outer membrane receptor precursor	PA4221	fptA	Fe(III)-pyochelin outer membrane receptor precursor
PALES_07051	263.6035297	0.607527293	0.256910569	2.364742312	0.01804262	0.034031201	0.607527293	1.523645518	PALES_07051	putative ATP-binding component of ABC transporter	PA4222	PA4222	probable ATP-binding component of ABC transporter
PALES_07011	1249.325951	0.703502386	0.248219686	2.834192554	0.004594164	0.010020757	0.703502386	1.628453344	pchE	dihydroaeruginoic acid synthetase	PA4226	pchE	dihydroaeruginoic acid synthetase
PALES_06991	1613.026799	0.596966071	0.246820112	2.41862815	0.015579157	0.029798428	0.596966071	1.512532426	pchD	pyochelin biosynthesis protein PchD	PA4228	pchD	pyochelin biosynthesis protein PchD
PALES_06981	348.4107743	0.740000891	0.243066206	3.044441686	0.002331126	0.005412356	0.740000891	1.67017687	pchC	pyochelin biosynthetic protein PchC	PA4229	pchC	pyochelin biosynthetic protein PchC
PALES_06931	303.4888958	-1.485093892	0.212284981	-6.995755808	2.64E-12	2.17E-11	1.485093892	-2.79935391	uvrA	excinuclease ABC subunit A	PA4234	uvrA	excinuclease ABC subunit A
PALES_06921	189.3891566	-2.071185625	0.242953454	-8.525030596	1.53E-17	2.08E-16	2.071185625	-4.202318834	bfrA	bacterioferritin	PA4235	ftnA	bacterial ferritin
PALES_06911	2306.118171	-1.999807445	0.215653305	-9.273252026	1.81E-20	3.26E-19	1.999807445	-3.99946616	katA	catalase	PA4236	katA	catalase
PALES_06901	921.8340339	-2.582912149	0.202475461	-12.75666758	2.86E-37	2.27E-35	2.582912149	-5.991478883	rplQ	50S ribosomal protein L17	PA4237	rplQ	50S ribosomal protein L17
PALES_06891	1691.175524	-2.159679513	0.195690601	-11.03619436	2.56E-28	9.07E-27	2.159679513	-4.468155865	rpoA	DNA-directed RNA polymerase subunit alpha	PA4238	rpoA	DNA-directed RNA polymerase alpha chain
PALES_06881	857.9267811	-2.103409828	0.200995482	-10.46496072	1.25E-25	3.67E-24	2.103409828	-4.297238436	rpsD	30S ribosomal protein S4	PA4239	rpsD	30S ribosomal protein S4
PALES_06871	1686.631446	-2.315891571	0.251935641	-9.192393601	3.84E-20	6.74E-19	2.315891571	-4.979122711	rpsK	30S ribosomal protein S11	PA4240	rpsK	30S ribosomal protein S11
PALES_06861	606.471137	-2.037866235	0.212342324	-9.597079822	8.22E-22	1.67E-20	2.037866235	-4.106377428	rpsM	30S ribosomal protein S13	PA4241	rpsM	30S ribosomal protein S13
PALES_06851	1702.550159	-1.715747477	0.184759876	-9.286364069	1.60E-20	2.92E-19	1.715747477	-3.284667819	secY	preprotein translocase subunit SecY	PA4243	secY	secretion protein SecY
PALES_06841	732.8726274	-1.918800623	0.192430473	-9.97139692	2.03E-23	4.79E-22	1.918800623	-3.781085895	rplO	50S ribosomal protein L15	PA4244	rplO	50S ribosomal protein L15
PALES_06831	380.8451357	-2.047157159	0.214036319	-9.564531686	1.13E-21	2.28E-20	2.047157159	-4.132907741	rpmD	50S ribosomal protein L30	PA4245	rpmD	50S ribosomal protein L30
PALES_06821	1208.988588	-1.916149229	0.208754216	-9.178972602	4.35E-20	7.53E-19	1.916149229	-3.774143371	rpsE	30S ribosomal protein S5	PA4246	rpsE	30S ribosomal protein S5
PALES_06811	644.5657728	-2.038521058	0.21145451	-9.640470937	5.39E-22	1.11E-20	2.038521058	-4.108241689	rplR	50S ribosomal protein L18	PA4247	rplR	50S ribosomal protein L18
PALES_06801	1227.939652	-1.972154667	0.209907401	-9.39535554	5.70E-21	1.07E-19	1.972154667	-3.923536625	rplF	50S ribosomal protein L6	PA4248	rplF	50S ribosomal protein L6
PALES_06791	663.172664	-1.569244532	0.199089761	-7.882095611	3.22E-15	3.62E-14	1.569244532	-2.967492805	rpsH	30S ribosomal protein S8	PA4249	rpsH	30S ribosomal protein S8
PALES_06781	551.8797667	-2.401211862	0.248934523	-9.645957629	5.11E-22	1.06E-20	2.401211862	-5.282467046	rpsN	30S ribosomal protein S14	PA4250	rpsN	30S ribosomal protein S14
PALES_06771	1859.586759	-2.474887674	0.205247483	-12.05806589	1.76E-33	9.84E-32	2.474887674	-5.559240028	rplE	50S ribosomal protein L5	PA4251	rplE	50S ribosomal protein L5
PALES_06761	424.997464	-2.608292209	0.215929784	-12.07935358	1.36E-33	7.69E-32	2.608292209	-6.097814269	rplX	50S ribosomal protein L24	PA4252	rplX	50S ribosomal protein L24
PALES_06751	455.8549756	-2.373310738	0.212832377	-11.15107943	7.07E-29	2.67E-27	2.373310738	-5.181287859	rplN	50S ribosomal protein L14	PA4253	rplN	50S ribosomal protein L14
PALES_06741	201.2038323	-2.803304214	0.243951519	-11.49123493	1.46E-30	6.43E-29	2.803304214	-6.980373407	rpsQ	30S ribosomal protein S17	PA4254	rpsQ	30S ribosomal protein S17
PALES_06731	101.1599184	-2.319522617	0.282602079	-8.207733722	2.25E-16	2.79E-15	2.319522617	-4.991670196	rpmC	50S ribosomal protein L29	PA4255	rpmC	50S ribosomal protein L29
PALES_06721	471.3804528	-2.408723658	0.2223809	-10.83152221	2.44E-27	8.00E-26	2.408723658	-5.310043421	rplP	50S ribosomal protein L16	PA4256	rplP	50S ribosomal protein L16
PALES_06711	1346.287794	-2.131046552	0.21967603	-9.700860618	2.99E-22	6.40E-21	2.131046552	-4.380351225	rpsC	30S ribosomal protein S3	PA4257	rpsC	30S ribosomal protein S3
PALES_06701	428.1505282	-2.085480836	0.231285452	-9.016913154	1.93E-19	3.19E-18	2.085480836	-4.244165269	rplV	50S ribosomal protein L22	PA4258	rplV	50S ribosomal protein L22
PALES_06691	1490.419839	-2.343627142	0.277107323	-8.457470981	2.73E-17	3.63E-16	2.343627142	-5.075771564	rpsS	30S ribosomal protein S19	PA4259	rpsS	30S ribosomal protein S19
PALES_06681	1338.292373	-2.352327278	0.210925201	-11.15242401	6.97E-29	2.65E-27	2.352327278	-5.106473358	rplB	50S ribosomal protein L2	PA4260	rplB	50S ribosomal protein L2
PALES_06671	283.3834944	-2.333553564	0.246729423	-9.457946031	3.14E-21	6.10E-20	2.333553564	-5.040453577	rplW	50S ribosomal protein L23	PA4261	rplW	50S ribosomal protein L23
PALES_06661	658.6000317	-2.208382867	0.193975878	-11.38483243	4.98E-30	2.09E-28	2.208382867	-4.621569462	rplD	50S ribosomal protein L4	PA4262	rplD	50S ribosomal protein L4
PALES_06651	1835.155985	-1.990502219	0.200785391	-9.913580902	3.63E-23	8.47E-22	1.990502219	-3.97375305	rplC	50S ribosomal protein L3	PA4263	rplC	50S ribosomal protein L3
PALES_06641	1676.268096	-1.884597346	0.194469209	-9.690980667	3.29E-22	6.99E-21	1.884597346	-3.692498528	rpsJ	30S ribosomal protein S10	PA4264	rpsJ	30S ribosomal protein S10
PALES_06511	2373.285031	-2.423355428	0.22000281	-11.01511124	3.23E-28	1.14E-26	2.423355428	-5.36417174	tufB	elongation factor Tu	PA4265	tufA	elongation factor Tu
PALES_06631	2756.623683	-2.25562486	0.206789238	-10.90784456	1.06E-27	3.57E-26	2.25562486	-4.775410849	tufA	elongation factor Tu	PA4265	tufA	elongation factor Tu
PALES_06621	3177.764256	-2.226382077	0.227665268	-9.779190705	1.38E-22	3.04E-21	2.226382077	-4.679589814	fusA1	elongation factor G	PA4266	fusA1	elongation factor G
PALES_06611	1728.674126	-2.200935117	0.248399652	-8.860459735	7.97E-19	1.23E-17	2.200935117	-4.597772611	rpsG	30S ribosomal protein S7	PA4267	rpsG	30S ribosomal protein S7
PALES_06601	1694.970556	-2.176139742	0.220941743	-9.849382533	6.90E-23	1.57E-21	2.176139742	-4.519426598	rpsL	30S ribosomal protein S12	PA4268	rpsL	30S ribosomal protein S12
PALES_06591	3953.034954	-1.621125373	0.182987783	-8.859200017	8.06E-19	1.24E-17	1.621125373	-3.076148974	rpoC	DNA-directed RNA polymerase subunit beta'	PA4269	rpoC	DNA-directed RNA polymerase beta* chain
PALES_06581	3497.25399	-1.143489042	0.190086132	-6.015636327	1.79E-09	1.11E-08	1.143489042	-2.209146419	rpoB	DNA-directed RNA polymerase subunit beta	PA4270	rpoB	DNA-directed RNA polymerase beta chain
PALES_06571	1498.079989	-2.973574529	0.193423524	-15.37338615	2.47E-53	5.34E-51	2.973574529	-7.854799928	rplL	50S ribosomal protein L7/L12	PA4271	rplL	50S ribosomal protein L7 / L12
PALES_06561	3151.713071	-2.813636952	0.21219853	-13.25945541	3.98E-40	3.44E-38	2.813636952	-7.030547059	rplJ	50S ribosomal protein L10	PA4272	rplJ	50S ribosomal protein L10
PALES_06551	1209.78031	-1.972735512	0.207213718	-9.520293998	1.73E-21	3.45E-20	1.972735512	-3.9251166	rplA	50S ribosomal protein L1	PA4273	rplA	50S ribosomal protein L1
PALES_06541	947.6079801	-2.032680174	0.200024546	-10.16215366	2.93E-24	7.48E-23	2.032680174	-4.091642715	rplK	50S ribosomal protein L11	PA4274	rplK	50S ribosomal protein L11
PALES_06531	395.9081507	-1.303091158	0.204761014	-6.363961233	1.97E-10	1.34E-09	1.303091158	-2.46757025	nusG	transcription antitermination protein NusG	PA4275	nusG	transcription antitermination protein NusG
PALES_06521	578.5254139	-1.366368735	0.20241202	-6.750432791	1.47E-11	1.14E-10	1.366368735	-2.578208135	secE	preprotein translocase subunit SecE	PA4276	secE	secretion protein SecE
PALES_06511	2373.285031	-2.423355428	0.22000281	-11.01511124	3.23E-28	1.14E-26	2.423355428	-5.36417174	tufB	elongation factor Tu	PA4277	tufB	elongation factor Tu
PALES_06631	2756.623683	-2.25562486	0.206789238	-10.90784456	1.06E-27	3.57E-26	2.25562486	-4.775410849	tufA	elongation factor Tu	PA4277	tufB	elongation factor Tu
PALES_06501	33.71338734	-1.132777536	0.355020582	-3.190737641	0.001419101	0.003442768	1.132777536	-2.192805019	PALES_06501	hypothetical protein	PA4278	PA4278	hypothetical protein
PALES_06491	30.3550844	-1.835989994	0.423904864	-4.331136886	1.48E-05	5.25E-05	1.835989994	-3.570163125	PALES_06491	pantothenate kinase	PA4279	PA4279	hypothetical protein
PALES_06481	50.73556119	-1.441798941	0.310031294	-4.650494867	3.31E-06	1.31E-05	1.441798941	-2.716593948	birA	biotin--protein ligase	PA4280	birA	BirA bifunctional protein
PALES_46761	2136.582156	1.884959968	0.19484101	9.674349191	3.88E-22	8.19E-21	1.884959968	3.693426756	pprB	two-component response regulator, PprB	PA4296	pprB	two-component response regulator, PprB
PALES_46881	436.5557601	0.770453767	0.20353165	3.785424853	1.53E-04	4.53E-04	0.770453767	1.705806222	pctC	chemotactic transducer PctC	PA4307	pctC	chemotactic transducer PctC
PALES_46921	196.0186848	-1.45626293	0.226285176	-6.435520682	1.23E-10	8.53E-10	1.45626293	-2.743966618	purU	formyltetrahydrofolate deformylase	PA4314	purU1	formyltetrahydrofolate deformylase
PALES_46951	234.7383964	-1.39165088	0.251486236	-5.533705951	3.14E-08	1.66E-07	1.39165088	-2.623787498	PALES_46951	hypothetical protein	PA4317	PA4317	hypothetical protein
PALES_46961	36.285415	-1.550038376	0.34284324	-4.521128591	6.15E-06	2.31E-05	1.550038376	-2.928249282	PALES_46961	hypothetical protein	PA4318	PA4318	hypothetical protein
PALES_46981	95.81478975	-1.030568944	0.315014791	-3.271493826	0.001069809	0.002674523	1.030568944	-2.042829707	PALES_46981	hypothetical protein	PA4320	PA4320	hypothetical protein
PALES_46991	53.81005258	-1.363841914	0.317160295	-4.300165996	1.71E-05	5.96E-05	1.363841914	-2.573696461	PALES_46991	hypothetical protein	PA4321	PA4321	hypothetical protein
PALES_47001	48.7394732	-1.774301837	0.315922188	-5.61626219	1.95E-08	1.07E-07	1.774301837	-3.420724313	PALES_47001	putative methanol dehydrogenase regulatory protein	PA4322	PA4322	conserved hypothetical protein
PALES_47011	24.9077877	-1.671282523	0.396945032	-4.210362614	2.55E-05	8.71E-05	1.671282523	-3.184976048	PALES_47011	hypothetical protein	PA4323	PA4323	hypothetical protein
PALES_47031	62.24931334	1.165383592	0.296739892	3.927289944	8.59E-05	2.68E-04	1.165383592	2.24292844	PALES_47031	hypothetical protein	PA4325	PA4325	hypothetical protein
PALES_47041	143.3247303	2.015125002	0.246069236	8.189260196	2.63E-16	3.23E-15	2.015125002	4.042156003	PALES_47041	putative lipoprotein	PA4326	PA4326	hypothetical protein
PALES_47111	301.6231452	-1.835613988	0.242311438	-7.575432678	3.58E-14	3.58E-13	1.835613988	-3.569232762	PALES_47111	putative fumarase	PA4333	PA4333	probable fumarase
PALES_47131	48.80109066	-0.85318039	0.323562031	-2.636837169	0.008368299	0.017019359	0.85318039	-1.806478883	PALES_47131	hypothetical protein	PA4335	PA4335	hypothetical protein
PALES_47141	325.4260214	-0.989495958	0.260020441	-3.805454497	1.42E-04	4.20E-04	0.989495958	-1.985491189	PALES_47141	putative amidase/protease	PA4336	PA4336	conserved hypothetical protein
[truncated: 585 more rows]
